# Supplementary material for: The interplay of RNA:DNA hybrid structure and G-quadruplexes determines the outcome of R-loop-replisome collisions
Source: eLife journal article supplement (doi:10.7554/elife.72286), 2021-09-08
Supplement: fig1-data4 [file elife-72286-fig1-data4-v2.pzfx]

<?xml version="1.0" encoding="UTF-8"?><GraphPadPrismFile PrismXMLVersion="5.00">
<Created>
<OriginalVersion CreatedByProgram="GraphPad Prism" CreatedByVersion="7.0a.118" Login="kumarc1" DateTime="2020-11-18T11:33:17-05:00"></OriginalVersion>
<MostRecentVersion CreatedByProgram="GraphPad Prism" CreatedByVersion="9.0.0.86" Login="root" DateTime="2021-07-22T13:19:58-04:00"></MostRecentVersion>
</Created>
<InfoSequence>
<Ref ID="Info0"></Ref>
<Ref ID="Info1" Selected="1"></Ref>
</InfoSequence>
<Info ID="Info0">
<Title>Project info 1</Title>
<Notes></Notes>
<Constant><Name>Experiment Date</Name><Value>2020-11-18</Value></Constant>
<Constant><Name>Experiment ID</Name><Value></Value></Constant>
<Constant><Name>Notebook ID</Name><Value></Value></Constant>
<Constant><Name>Project</Name><Value></Value></Constant>
<Constant><Name>Experimenter</Name><Value></Value></Constant>
<Constant><Name>Protocol</Name><Value></Value></Constant>
</Info>

<Info ID="Info1">
<Title>Project info 1</Title>
<Notes></Notes>
<Constant><Name>Experiment Date</Name><Value>2020-11-18</Value></Constant>
<Constant><Name>Experiment ID</Name><Value></Value></Constant>
<Constant><Name>Notebook ID</Name><Value></Value></Constant>
<Constant><Name>Project</Name><Value></Value></Constant>
<Constant><Name>Experimenter</Name><Value></Value></Constant>
<Constant><Name>Protocol</Name><Value></Value></Constant>
</Info>

<TableSequence Selected="1">
<Ref ID="Table0"></Ref>
<Ref ID="Table3"></Ref>
<Ref ID="Table4" Selected="1"></Ref>
</TableSequence>
<Table ID="Table0" XFormat="numbers" YFormat="replicates" Replicates="1" TableType="XY" EVFormat="AsteriskAfterNumber">
<Title>Raw CD &amp; HO ClaI-Center</Title>
<RowTitlesColumn Width="39">
<Subcolumn></Subcolumn>
</RowTitlesColumn>
<XColumn Width="81" Subcolumns="1" Decimals="0">
<Title></Title>
<Subcolumn>
<d>1</d>
<d>2</d>
<d>3</d>
<d>9</d>
<d>10</d>
<d>11</d>
<d>12</d>
<d>13</d>
<d>17</d>
<d>18</d>
<d>19</d>
<d>22</d>
<d>22</d>
<d>26</d>
<d>27</d>
<d>28</d>
<d>29</d>
<d>30</d>
<d>31</d>
<d>32</d>
<d>33</d>
<d>34</d>
<d>35</d>
<d>36</d>
<d>37</d>
<d>38</d>
<d>38</d>
<d>39</d>
<d>40</d>
<d>41</d>
<d>42</d>
<d>43</d>
<d>44</d>
<d>45</d>
<d>46</d>
<d>47</d>
<d>49</d>
<d>52</d>
<d>53</d>
<d>54</d>
<d>55</d>
<d>56</d>
<d>57</d>
<d>58</d>
<d>59</d>
<d>60</d>
<d>61</d>
<d>62</d>
<d>63</d>
<d>64</d>
<d>65</d>
<d>66</d>
<d>67</d>
<d>68</d>
<d>69</d>
<d>70</d>
<d>71</d>
<d>72</d>
<d>73</d>
<d>74</d>
<d>75</d>
<d>76</d>
<d>77</d>
<d>78</d>
<d>79</d>
<d>80</d>
<d>81</d>
<d>83</d>
<d>84</d>
<d>85</d>
<d>86</d>
<d>87</d>
<d>88</d>
<d>89</d>
<d>90</d>
<d>91</d>
<d>92</d>
<d>93</d>
<d>94</d>
<d>95</d>
<d>96</d>
<d>97</d>
<d>98</d>
<d>101</d>
<d>102</d>
<d>103</d>
<d>115</d>
<d>116</d>
<d>117</d>
<d>118</d>
<d>119</d>
<d>120</d>
<d>121</d>
<d>122</d>
<d>123</d>
<d>124</d>
<d>127</d>
<d>128</d>
<d>129</d>
<d>130</d>
<d>131</d>
<d>132</d>
<d>133</d>
<d>134</d>
<d>135</d>
<d>136</d>
<d>137</d>
</Subcolumn>
</XColumn>
<XAdvancedColumn Version="1" Width="81" Decimals="0" Subcolumns="1">
<Title></Title>
<Subcolumn>
<d>1</d>
<d>2</d>
<d>3</d>
<d>9</d>
<d>10</d>
<d>11</d>
<d>12</d>
<d>13</d>
<d>17</d>
<d>18</d>
<d>19</d>
<d>22</d>
<d>22</d>
<d>26</d>
<d>27</d>
<d>28</d>
<d>29</d>
<d>30</d>
<d>31</d>
<d>32</d>
<d>33</d>
<d>34</d>
<d>35</d>
<d>36</d>
<d>37</d>
<d>38</d>
<d>38</d>
<d>39</d>
<d>40</d>
<d>41</d>
<d>42</d>
<d>43</d>
<d>44</d>
<d>45</d>
<d>46</d>
<d>47</d>
<d>49</d>
<d>52</d>
<d>53</d>
<d>54</d>
<d>55</d>
<d>56</d>
<d>57</d>
<d>58</d>
<d>59</d>
<d>60</d>
<d>61</d>
<d>62</d>
<d>63</d>
<d>64</d>
<d>65</d>
<d>66</d>
<d>67</d>
<d>68</d>
<d>69</d>
<d>70</d>
<d>71</d>
<d>72</d>
<d>73</d>
<d>74</d>
<d>75</d>
<d>76</d>
<d>77</d>
<d>78</d>
<d>79</d>
<d>80</d>
<d>81</d>
<d>83</d>
<d>84</d>
<d>85</d>
<d>86</d>
<d>87</d>
<d>88</d>
<d>89</d>
<d>90</d>
<d>91</d>
<d>92</d>
<d>93</d>
<d>94</d>
<d>95</d>
<d>96</d>
<d>97</d>
<d>98</d>
<d>101</d>
<d>102</d>
<d>103</d>
<d>115</d>
<d>116</d>
<d>117</d>
<d>118</d>
<d>119</d>
<d>120</d>
<d>121</d>
<d>122</d>
<d>123</d>
<d>124</d>
<d>127</d>
<d>128</d>
<d>129</d>
<d>130</d>
<d>131</d>
<d>132</d>
<d>133</d>
<d>134</d>
<d>135</d>
<d>136</d>
<d>137</d>
</Subcolumn>
</XAdvancedColumn>
<YColumn Width="81" Decimals="0" Subcolumns="1">
<Title>CD</Title>
<Subcolumn>
<d>2469</d>
<d>2124</d>
<d>2094</d>
<d>2102</d>
<d>1951</d>
<d>1810</d>
<d>2780</d>
<d>2106</d>
<d>2615</d>
<d>2870</d>
<d>2394</d>
<d>2537</d>
<d>2519</d>
<d>2384</d>
<d>2582</d>
<d>2031</d>
<d>2301</d>
<d>2337</d>
<d>2759</d>
<d>2082</d>
<d>2373</d>
<d>2504</d>
<d>2544</d>
<d>1965</d>
<d>2407</d>
<d>2951</d>
<d>2412</d>
<d>2252</d>
<d>2582</d>
<d>2103</d>
<d>2382</d>
<d>2501</d>
<d>2329</d>
<d>2114</d>
<d>2717</d>
<d>2111</d>
<d>2506</d>
<d>2620</d>
<d>2315</d>
<d>1947</d>
<d>2010</d>
<d>2299</d>
<d>2482</d>
<d>2359</d>
<d>2907</d>
<d>2673</d>
<d>2713</d>
<d>2879</d>
<d>2443</d>
<d>2156</d>
<d>2899</d>
<d>3077</d>
<d>2431</d>
<d>2814</d>
<d>2811</d>
<d>2199</d>
<d>2427</d>
<d>2072</d>
<d>2073</d>
<d>2626</d>
<d>2132</d>
<d>2991</d>
<d>2199</d>
<d>2415</d>
<d>2346</d>
<d>2724</d>
<d>2738</d>
<d>2457</d>
<d>2558</d>
<d>1930</d>
<d>2696</d>
<d>2251</d>
<d>2070</d>
<d>2440</d>
<d>2468</d>
<d>2546</d>
<d>2497</d>
<d>2280</d>
<d>3012</d>
<d>2246</d>
<d>2905</d>
<d>2324</d>
<d>2091</d>
<d>3055</d>
<d>2555</d>
<d>2004</d>
<d>2994</d>
<d>2776</d>
<d>2668</d>
<d>2556</d>
<d>2229</d>
<d>2240</d>
<d>2508</d>
<d>2108</d>
<d>2513</d>
<d>2136</d>
<d>3040</d>
<d>2244</d>
<d>2192</d>
<d>2256</d>
<d>2433</d>
</Subcolumn>
</YColumn>
<YColumn Width="81" Decimals="0" Subcolumns="1">
<Title>HO</Title>
<Subcolumn>
<d>2453</d>
<d>2905</d>
<d>3240</d>
<d>2980</d>
<d>2564</d>
<d>2931</d>
<d>2747</d>
<d>2444</d>
<d>2514</d>
<d>2959</d>
<d>2593</d>
<d>2884</d>
<d>3257</d>
<d>2710</d>
<d>3249</d>
<d>2274</d>
<d>2920</d>
<d>2442</d>
<d>2732</d>
<d>3113</d>
<d>3378</d>
<d>2874</d>
<d>2905</d>
<d>2886</d>
<d>2931</d>
<d>3168</d>
<d>2532</d>
<d>3035</d>
<d>2598</d>
<d>3112</d>
<d>2993</d>
<d>2943</d>
<d>2839</d>
<d>2918</d>
<d>2527</d>
<d>3138</d>
<d>2959</d>
<d>2722</d>
<d>2644</d>
<d>3170</d>
<d>3152</d>
<d>2701</d>
<d>2734</d>
<d>2842</d>
<d>2434</d>
<d>2732</d>
<d>2173</d>
<d>2183</d>
<d>2217</d>
<d>2534</d>
<d>3319</d>
<d>2789</d>
<d>2523</d>
<d>2454</d>
<d>2529</d>
<d>2535</d>
<d>2804</d>
<d>2948</d>
<d>2774</d>
<d>2350</d>
<d>2808</d>
<d>2678</d>
<d>3243</d>
<d>2392</d>
<d>2356</d>
<d>3027</d>
<d>2377</d>
<d>2682</d>
<d>3376</d>
<d>2789</d>
<d>2696</d>
<d>2708</d>
<d>2182</d>
<d>2350</d>
<d>2470</d>
<d>2862</d>
<d>2659</d>
<d>2743</d>
<d>2698</d>
<d>2752</d>
<d>2787</d>
<d>3039</d>
<d>2451</d>
<d>3128</d>
<d>2424</d>
<d>2992</d>
<d>2995</d>
<d>3000</d>
<d>2327</d>
<d>2819</d>
<d>2199</d>
<d>2330</d>
<d>3219</d>
<d>3193</d>
<d>3133</d>
<d>3040</d>
<d>2902</d>
<d>2865</d>
<d>2900</d>
<d>2822</d>
<d>2771</d>
<d>2805</d>
<d>3004</d>
<d>3301</d>
<d>2943</d>
<d>3137</d>
<d>2805</d>
<d>2786</d>
</Subcolumn>
</YColumn>
</Table>
<Table ID="Table3" XFormat="numbers" YFormat="replicates" Replicates="1" TableType="XY" EVFormat="AsteriskAfterNumber">
<Title>Frequency distribution ACS-Center</Title>
<RowTitlesColumn Width="39">
<Subcolumn></Subcolumn>
</RowTitlesColumn>
<XColumn Width="81" Subcolumns="1" Decimals="0">
<Title></Title>
<Subcolumn>
<d>1800</d>
<d>1900</d>
<d>2000</d>
<d>2100</d>
<d>2200</d>
<d>2300</d>
<d>2400</d>
<d>2500</d>
<d>2600</d>
<d>2700</d>
<d>2800</d>
<d>2900</d>
<d>3000</d>
<d>3100</d>
<d>3200</d>
<d>3300</d>
<d>3400</d>
</Subcolumn>
</XColumn>
<XAdvancedColumn Version="1" Width="81" Decimals="0" Subcolumns="1">
<Title></Title>
<Subcolumn>
<d>1800</d>
<d>1900</d>
<d>2000</d>
<d>2100</d>
<d>2200</d>
<d>2300</d>
<d>2400</d>
<d>2500</d>
<d>2600</d>
<d>2700</d>
<d>2800</d>
<d>2900</d>
<d>3000</d>
<d>3100</d>
<d>3200</d>
<d>3300</d>
<d>3400</d>
</Subcolumn>
</XAdvancedColumn>
<YColumn Width="81" Decimals="0" Subcolumns="1">
<Title>CD</Title>
<Subcolumn>
<d>1</d>
<d>2</d>
<d>5</d>
<d>15</d>
<d>8</d>
<d>11</d>
<d>13</d>
<d>14</d>
<d>8</d>
<d>7</d>
<d>5</d>
<d>5</d>
<d>5</d>
<d>2</d>
<d>0</d>
<d>0</d>
<d>0</d>
</Subcolumn>
</YColumn>
<YColumn Width="81" Decimals="0" Subcolumns="1">
<Title>HO</Title>
<Subcolumn>
<d>0</d>
<d>0</d>
<d>0</d>
<d>0</d>
<d>5</d>
<d>3</d>
<d>9</d>
<d>11</d>
<d>4</d>
<d>14</d>
<d>15</d>
<d>16</d>
<d>12</d>
<d>6</d>
<d>8</d>
<d>3</d>
<d>2</d>
</Subcolumn>
</YColumn>
</Table>
<Table ID="Table4" XFormat="numbers" YFormat="replicates" Replicates="1" TableType="XY" EVFormat="AsteriskAfterNumber">
<Title>Frequency distribution ClaI-Center_with guassian curve</Title>
<RowTitlesColumn Width="39">
<Subcolumn></Subcolumn>
</RowTitlesColumn>
<XColumn Width="81" Subcolumns="1" Decimals="0">
<Title></Title>
<Subcolumn>
<d>1900</d>
<d>2000</d>
<d>2100</d>
<d>2200</d>
<d>2300</d>
<d>2400</d>
<d>2500</d>
<d>2600</d>
<d>2700</d>
<d>2800</d>
<d>2900</d>
<d>3000</d>
<d>3100</d>
<d>3200</d>
<d>3300</d>
<d>3400</d>
<d>3500</d>
</Subcolumn>
</XColumn>
<XAdvancedColumn Version="1" Width="81" Decimals="0" Subcolumns="1">
<Title></Title>
<Subcolumn>
<d>1900</d>
<d>2000</d>
<d>2100</d>
<d>2200</d>
<d>2300</d>
<d>2400</d>
<d>2500</d>
<d>2600</d>
<d>2700</d>
<d>2800</d>
<d>2900</d>
<d>3000</d>
<d>3100</d>
<d>3200</d>
<d>3300</d>
<d>3400</d>
<d>3500</d>
</Subcolumn>
</XAdvancedColumn>
<YColumn Width="81" Decimals="0" Subcolumns="1">
<Title>CD</Title>
<Subcolumn>
<d>1</d>
<d>2</d>
<d>5</d>
<d>15</d>
<d>8</d>
<d>11</d>
<d>13</d>
<d>14</d>
<d>8</d>
<d>7</d>
<d>5</d>
<d>5</d>
<d>5</d>
<d>2</d>
<d>0</d>
<d>0</d>
<d>0</d>
</Subcolumn>
</YColumn>
<YColumn Width="81" Decimals="0" Subcolumns="1">
<Title>HO</Title>
<Subcolumn>
<d>0</d>
<d>0</d>
<d>0</d>
<d>0</d>
<d>5</d>
<d>3</d>
<d>9</d>
<d>11</d>
<d>4</d>
<d>14</d>
<d>15</d>
<d>16</d>
<d>12</d>
<d>6</d>
<d>8</d>
<d>3</d>
<d>2</d>
</Subcolumn>
</YColumn>
</Table>

<!--Analyses, graphs and layouts as compressed binary. Don&apos;t edit this part of the file.-->

<Template dt:dt="bin.base64" xmlns:dt="urn:schemas-microsoft-com:datatypes">eF7sXQdgVEX6n002Ib0AAkrxAYKAEDYbQhIEsxDAcCLk6HAKhGSB1TSTpVqIiliw
INgpImADUTwbHnrEhg08Cyh3lgPbIYogiH9Ehf/8Zt7sm33Z8pJsMAnvB5Np38x8
80198+Z9m5czdOiFowb2sVTGEUKWWJZYwqgpJBPCHiIzachLYcQLC8M19zhqwqjf
SUq0wCAYS0brgxjCKsecS8gQ6oogyJHbP1sIsVKbWgQFn6QQbjCGOJZatREuwgB/
pZkwYcKECRMmGi6w1pswYcKECRMmGjewnuNZXTpEMGHChAkTJkyYMGHChAkTJkyc
Ypjn7SZMmDBhwkTjx9dWnLUPoq5R4YQMt2q2cZw8eZIssVhIs8Qo5u9orWxGSKTq
i7W2iRxPohJFlhF8D2ElP7VXQ4JgBRnbvv1TfOuxP6Y0qpC6mpFc5s8loduSxBFc
cJTRfmz/7LnFRcpsZ3mFq7RkQKfUFFsnxVlSUFroKpkxoNPYMUN7ZXbKviCmf8fB
I3PGTMwbopQVuSrcSt7YQcOH5SidevXuPbCsrMjZu/fgMYOVvOHDRo9RaB69ew8Z
0UnpNNPtLuvXu/ecOXNS8kGVUlBaDMKK3nnlpWXOcve84TSzXjRBSqG7sBMthufu
xQ4NLXQVuC+Iie5/uXPeBTQLNbOycleJOyUvf4ZzaGl5cb47hVtuynkeopzl/Xsj
BU2oZuA7B7er4HKnO6Wg3JnvLvWkie5f4abRMyTyy0qncdr+vdW4IFm63M7igeXl
+fO0TPPhhUtjyk8eRiqGtCorU1Iz7FPsqVPsaZnUypJZ9FOAymSFO9/tHFqUP0PO
FKXMcJZfYOvfWzgZz709kuwtauIJ81mIVIu8i3NLy13zS0vc+UWjnBVNpXH8VAsp
KdNFF2TY+/dmDv+5nfqWGFnuclKG3XSUNZ128FEpWYKp3hL0neGpb4rRBflFVExN
pxl0FUIa1v9TG+A4GEcXIVdBE5uPfFTK0wgNcjYSDDe5oeCnYp7WaCBDomLWtDG8
nLJ8ui2b4iqZXjpFyMxXW+RdnJc3OA+0OaWFzhH5xU5NVB75+CzKT6sZbbaAmVZv
N7nh5JYLWguJo+FON9txyfupgGz4aiu/jSW1ltRccht6OB1Tnl9SUcSWt9GMF8Z6
oxa+gSpJ7I0drTSMxhjjKp2RX53VRiV9P3WQ+CnJ71XUAMStL8lrgh1YeNmsCrez
EIGjnAWe6aoxtYU+G2MV1OUaQMqBo/iuoG+mvBKJ4PRM72CpkeDzxfyf3g9oh27i
HUFfQ122ovF6pXpt9YIEZ2TafAX3tXkHN7AeQEUxjO5VUrSVfLCr2FmCw6Om0QGM
VFCXawApB47iDe6ne2R5BzfcflBtRWsq7V+tYhKTDXap1vgfW5LvbylrIi0UoIa6
bAPIOXAUH4uNcrH2LSf9WtYEu4K+irp8RfP5WZf9BDfu5bqsrNDnjNYkWt9f5SRG
G8JTrJ+SBuYNG8ffvmmtorJps6XYbUbP0NzzyqR2rdZAOqGN0TeWh9lAZVTn1R+r
gXKROfXPqNiJ6zkVjPbvzV5dXhATWcm/7mrG3jlzDCx35Rdpb12DQtY4w/PBK2BL
jfNZIr055vnwjHOdRbOdtPr5WnRAyPxEOq5m+mWgh+Ya5nqoMyF3Ef4unBA7ET4U
DiruQxaaT2iy4T6R32Lmyj1JyN1kZzMtvPbcmrpwTJgwYcKEiT8b2BEs96zI28js
MPM7eBN/BsIcWWyfTkg06UL/5tK9e+mM8vxipXS6Mip/jpIzWOmq5I5Ucoryh/XK
cdLHq3ISQ3rqrmJic2oN47Z3zOkLISMM834kiUDEEI6F/Ea4pDaTnmq8HtGq0eN8
zwMF0J+lj1FDxINFIEQpV1GqDjVIEWoMIGexkuXpTjynIH41u+mLEP746A19bnJK
X9hPRH0BUWehGhRqRSMJHgkJkyskDmnGEtwRJiSemgRqEqlB+yVT05yaFtS0pOYM
alpR05qaNtScSQ1q15aadtTg2nM2UQgvkT+6Ug6syEtrRdgOlsfQcucVs5wlBfOU
Qheeq6fNwoUAKQswz5O19DxVIk7LYrCzoqDcVeZ2zXYqOCyh+bgKKqQsPIjS2l9I
0cEz900snlQNEYsHVkPEaAbDxGgvw8RoWMPE6AGGidFVfBDHKAqpTow+JRPHKgGI
0fkME6OXGiZGdzZMjH5vmBgDxDAxer9hYgw5w8QYm4aJMYgNE2O0GybGtGCYGPOH
YWKMcMPEmJEME2PqMkyMOc4wMSZDw8SYNQ0TY3r1QTyU5NIZZW90czIVndiECRNN
Amx4S24MfrF5qA2iDKbkJU50MEtZQe196eTn9dzvFU6xRA3X+3NVf6FIl6radYeQ
C50TDdbIGJDnTpbz/Z6nlMc9zyyCwhfkljKWQkzigLEU8nJgLIXJFWAshckVYCyF
yRVgLIXJFWAshckVYCyFyRVgLIXJFWAshckVYCyFyRVgLMWp5ipLfdFjIdHsp7VG
lJYUuUqU6S433vT4PnmWX/pMmeNyz1RmzMqvqHDllygFs8pnO4n/F0E4EbwwfxYn
/pv90uHO/Aq3UnHFrPxyZwVKHe0qKXAq80pnKQUzSyucSn7FvOJiJy26QMkZVqF0
y69Qyp0FpTSspNBZ2L2nQhktLHVWlCx1K8X5lzuVCmdJhXfZDRXVXwRx3SgWchKG
Np//F0H+oL0IQqr+pBvRzqTFaw24feEpVpo4lJZfgugpBbTXRvAZSRFqiNdGXHoc
OBsGEO/92kimEhQy5JS+oL02goSRI4aSr9dFAFqg/l8bsSIJ51nU08F4GEJHlb8X
RVZfL4rA0Jj8aUVODH06HmcVueVXRKJXUeYVZITEKJyXCAnksNHvg8c2pBv8wVN4
EKVNY2KCc/C8fBObL4s8iOJdzjAx+qZhYvNlkQdR5ssiCVFN8GUR6biH2P470UNv
woSJpoV98oygflMxxVecBARjDyEDUwgmEkwf2LvDzSFd2XLc4WD2ppXcnrDB8cD9
wOPZgsQLEh3P6+ACo7bIwl84xyFRrkMOlYFUmByphTwWsOlRDRe2HgiXr6m9RhJi
sBuIIxbSrtl1ZHdYH7ZhA3h+PB3nDs8+mo9LVfjCvXxWL1+Ely/Sy9fMyyde8HFf
tJcvxssX64ez6lybPtNn+kyf6TN9NfVVevmuDUDZcNfGOC9fvJcvwcuX6OVL8vIl
e/mae/laePlaevnO8PK18vK19vK18fKd6eU7y8vX1svXzsvX3svXwct3tpdP8fJ1
8/J18vJ19vKd4+Xr4uXr6uU7N0AJ3b18Pbx853n5enr5enn5Urx8vb18Ni9fqpfP
7uVL8/JdWInTZrGbFI/f3akTYTiyQZg45wFyKx8h2gM822VWpf168EKR9lC2yK0a
GJ1IGYCOgZ0Sr77//hcpnZ8HAIDlKbtl2nnsTCYc6Ve9vWDBSf6XUZx8i7a7GieS
oi6qy5PLyQrad1TnSdS2Mpvb3v7t7IxfCwUO6Si1sGGMeuKAgcVlRS73rEJnD+fc
sm69bCnpPbp1m9DrYmd+Sffeowd3n2zvHh9DhiWhjWqSIo8dEMpveEheEhqzWvDf
yXwaNGamU5mozM4vmuWsUIpnVbiVaU5luvrWyUXDuk0vzy/AKXZFT6XMWV4ABcYz
nNRTWq4UlM4qcVd0x2m1moN7Zr5bmZ5fVKS4StylyjRXSYVS6JzuKnEWKtPm0Win
MkHJn+uqSCF/T7qGlv/n8vAM7//PJOFhiDmfZc+f6Czv4nTKM2L+8PL9lTwrXgr9
abxLCDgSTJgwUVs0tdOpUXyaG003CoR4lhSCVYSMHowdphyMaZFFoUo0egx7H+EP
T3t+vkOsiK/TPRXkEYbFks2qpKPmTNqxffsALsO3yfmCEOCnYmwqe7tjtaB8bBDY
/sDTAM5byQ/ygVfNMzBnZBMmGgH+1BkZCPGMLGyRhb9wjlPzvsCEiYaAwOcEwVHX
9A0GYpDWEY05G8xpsrk16VaitnAD+YO7iYGuADMiFbjUJnAqUuQ65NM7frvVPL0z
T+9q+6xjnt7VjXcJAUeCCRMmaoum9qxont75ycCckU2YaARoajOysEUW/sI5zNM7
E6cPAp8TBEdd0zcYiEFaRzTmbMzTOw01T5HrGFeJvT3WQv4N9fiAe/kJAWMner6g
BlIcqsv2EHfRx4ZCx2NEIdqtQF8Arf+ayMDZi0Bjy3ecKnmcZfKv00MneZuQfNmj
puQZvCV/oYMrubunErknknvJ/cwmZDrhuX5HI16npjfdIo7UkrI4fN96SjRdgCng
vkr+6TIK3ykdffdkuvpkVuKr8RIfEmacCn3GzS+qKFUqZpbOYU+3o4fgadiZXzBT
Kcsvz6dZOstTlGHTWVEsx7JZbidIaWpV5UBPkVJ9iJ7jos/PJaVKUWnJDGc5jkiR
fUlKfC/2SbXF0/ioeQz5mrbyfY4XKxHyouM7NmHpu8c9Dk1z4SNqLhw9CP8EHLGP
kquJduEYFEKBhHbIERIoORNufuOqjyO7O4ZbeSEoGNBYQPEyC+xkJXRQcmKWpSXP
da9VWbD4YAFSlFnAkU8IoeQkXXLt8mXPuVUWwnywgNErWICSg5A3xMvnOr9Jue9I
ttoQscFZCHlDXPTm1VcdeHOQaAgDLIS8IRyRj7d9/9Ec0RA+WBBdEixgzIS8IRL2
z7/QfbCzGBE9qrOAISqzEPKGiNvfus+bH6wRDeGDBfHmR7AQ8obY/dVrl1sSy0RD
+GABJxOChfNIPTRE7s1nzF68IEU0xHnVWcBWUWYh5A3xH3tWv8vbrhMN4YMFrNwy
CyFviLt//ub4jnOvFA3hgwV5UELxyWDnjHInXb64Gi1nYWmxyK1WUHK43VM0REJw
Fkapa3yhSllHKDnHXnM9/fst36mzo8UAC+Jn2ZXQ8KLkFG7p/cgnq/apLIQZYGH0
LParNaP5dkfkVGsoOQu/3vtW98gxakOEG2FhXspckT4EUHI+vuj3jg90CldZsBpg
YdTFo4eI9CGAkvNl1v0k61uLykKEARYGDsspEOlDACVHmXPg9spPxEoZGYQFuOle
Fj8TO8NZKI5C6wQxKAlRB+XJ4CyMmFU8jW5jaY900c0w09BVl04pWOgqZkcfLOB0
FiwI/WYhXyM+e/yJkr9/dB5jAYVUZ0H8GpFgIeRrxLCDd7bI2/SIyoKv7St2SjIL
IV8jmn/xcY8fPq5QWQi0fQUL9bJ9tR0+fGdMz1/Y7JgccPsqWAh5Q1x3z1dfjxrM
B2VywO2rYCHkDfGW44FD2fsFC762r3jXLFiol+3rwatHfDAjgQ/KZJ/bV9ypklkI
eUM8VznhjQ8SPCPCBwuYlGUWQt4Qk3qc03vC+BLRED5YwHGKYKFetq+H1jwUvjc2
VTSEj40bJmaZhZA3xD/Cp12TPfJR0RA+WEDRMgshb4gThR9XfpAwXzSEDxbkQVnv
29fkgNtXwUJotoweKDmJyWunxT7Bt6/JAbevgoWQb18XtOg2/MHX+fY1OeD2VbAQ
8u1r+rq0S2Y/P0FtiEDbVw8Lod6+blr7ba9fB0aoLATavnr6Qqi3r312fvb7gi/5
Djo54PbV0xdCvX19cEnnM4Y/NFhlIdD2FSzAXa/b1+SA21fBQj1tX88Rs6OHBd9H
9oIF4QdrAsZSyGfBxlJADALGUphcAcZSmFwBxlKYXAHGUphcAcZSmFwBxlKYXAHG
UphcAcZSmFwBxlKYXAHGUpxqrrIcUZU8h2h2GWlU/hwlZ7DSVckdKf9wDKn+IzEM
Yd4lne6QZRRLbGrTxBF+og4D2T+kmr+apkGbPMLflsOtB15hXw4HHWzKQ/L1S1zr
w0j0Hi76MLiEwQhylIWxkXw7owTO9dDyngOIFCdoCtGjfA1LQIxLuaQ4rwuHop68
fJxxi1j0UtAjVIDHIhR86mMTK/trHk+t4MbZMNxsMFi0w3w939E8JEn6euMIO+0F
M7DxSxHAHZ6GAfRZCeb0QLG4bOYPS9SUS9n0CTzvdcMw0cGrKPL2VUWEIbVoFj0f
fquIomHDAIGrqPcLoFgjVRRVEeuAv6qg+v6rgtQ5g+tUGdFW+syBmlZGLIO1r0zu
yAZQmZvVimg3HqPUFRq/+YaK5roq3KUzyvPZObOf5bqf75+CU1dxfDrl9flUmLmK
C0AMxlbxNarRrxqmaVhGjFe49cCkwD5gVldxeRTMIfhWGT/wx4EZYC79+zY7XOcQ
413suL1X8WzCV3ExBYlVHH4g2Cou1FDALdIAAVbxBfIqLu475pVxPyi0VVxcRZRj
+VQKvgHBE2xcogcFGwwWbRXXT2p+lzj/qziKQzayCMRkqgeKDYRAqzjKEauFiNVX
UWx85FW8ehVxDWKQq0RRn42qV1a/auxit9TxWkpKFmOx+BeCeNnvSwjGVxNeWfQD
QF9ZUZ68NOqzrcE6v4tlAipKHhaocqLrhaJygit95cQ11+CVM7Tua5Wj5Kegcv73
AWE12QcMdlYUlLvK3K7ZTqXCne+maVwFFeY+ICggBv/7AGEgvPYWbtyEG/36Y5qG
YcR4hVsP/T5ABlbw5brRrA8T411Oqe0DELpDihGLmLqce/YBgK9ZQ+wDxG9uChjd
B4jr9ggFQKHtA8R1UzmWT63yUw6AGmFqxQyn3wcIWjFnevYB2zzBCFjFfO8Pg/sZ
uMg+5n6Yms2W3cNYtAqEp1OjRNgYDYreF7aEuVOoORSpeMLfCufhoN8UZauWj0LN
1GjioT9k5fTXUVMZsaka/RJqbJFVjAbuQ9R9hLxv8d7HwFbUFALy9K6Q2sXpYTSd
Qk5tnB5G0ymkdnF6GE2nEP9xyeQ4/fsLNWNK3flFSskscWOGf9BIWlksODznYc65
BUWzCp2FIvJMOXKaqwSqgtSo1hbLxa4SV/GsYtLMYrGnd1HyuE44V5GTJNBIZ6Er
v4REWiwZ1ePy54qE7H6j1WIZ7S5MUQY7Z7v4r0QnqCFDystLWeGMrrnFMrx0DuUm
i2aZMwzhxQhvabGMLSvzGb7rNK+/tpGDweSHngJ5AIGeQwL1TO05ZDARm8iz6L/2
JIP9PC4ho+iW4lL6WFBKN2PzqL2YPVUQcg+drldR/yam1ZLQ+bMN+YKa58k6wq8h
C+CbZfAGuz3hvGYQ/vO7YG0U4Re2sf2/lPAPZTF1lxK+EUV956nhWCIWq/SIu0cN
gx9zNmhQ502E/34xHk8ws2MRwbL0hepGq4iduXjuEvITywf4gRvx/pcPz2OH9wKC
Xy0mZE8u3GBuD1nN3AivtOzJZdEqEK5QY7PwiR+LxiYLXzQQnhfGw+F+X3LnhZNq
CwJ2dvssqxkN3DeFae5u4at90r8VrtHMtK42FxCGP5NPPYymU4j/uGS2eXmImlRb
Kgm3WGx0FFhUd2pmqg2zlz01Kz0lHZOdvY89g4X0tafBTrNlcH+fNHuK3Z6RwU0m
SUKcLSU1K9OWlZFms9vS0hFmz0rJzLBl2jNS7X3SM212FpaWYU/J6tsnM92ebren
sbT2PlmpKX2ybOlZNK09NQNhu8gGgtuijYBV/RGCPDlD1mIPKreKQG0m52b0XwRN
ySeiFnRyaksnwi7U7kVNujqZDSAt6R67JXEyLQSYPluS26ipPjkjH/AGW0x44At+
sIbfokeeiMOELU4XuqjhoOulumGwsRVHGQMI/3l6zH/Y8cONvPG6A25MzpjY4cbk
fJvqhmDF5CxUgAn5ickZZRibnNmxSegmZ7Zzt/CdPibqqWF8okY4CefhoN/kZ3Ju
I03ImyX3BD+T8zFpcr7PnJxV/Jl86mE0nUL8xyVLM16mNOMxN51q2LxmT0/rk2JP
Z9vUTFsfdfLLyrKnZLDAtLSMTEaXkZlOZ7Ssvnb2P43PcTQo00Ynrkx7ui0zlYVl
pvTJSLVlpfdJTcvK6sPmM3sGnQ37pGXZ6NyYbrPz+TGzjz0lzU596Rm2LBtLu4s8
TZnd2HgY1h+HyhM15H4qJupY0pVOjDZqn69O1Dl0whtPzeXqRL2A2stCMlFjXkOd
uhJtF21Tw0EH5bZios4h2kQ9XnUjb1wcERM1Tl3ERL1MdUO8gY6Aw+kU3Inavt/y
KgNzRpvXtmoC/we9aEUYrAsPqUZ/sGiahmXETAS3HhiZ3eCgQ0r/wreMmleI9wvf
K+jfV3288MWIZgetXi980VPOVWNAJR/qwgR74QsIjkQamAAHvWXyQa/YsPm+tiU+
Ya5+bUvmE7mit/u7tsVPKTTU4oUvikM2sgjqvkQIIu2FL8oR+13Btq8qIgypRbMY
riKKhs1XpmBVFK2pB2iNVFFURbw+8FcVsfr4rorh17n+KyPaKhSVEUtx7Stj6PVt
fVfG/1ptpWziVM7PWi29rJ0yx+WeqcyYlc9V/xXMKp/tJOYCbgTmAt6UjBiqcOuh
X8DlwXEFNa8SbQGXwwTEUBfvUr0XcGzIsYALKnlhhKnvBRzTFeh9L+DJPmL5LAq+
AcQiV0xC/hZw1FyG39XN/wKO4oQqEIH6WMBZOepCIdj2VUWEyQu44Sr6XyZ8VVG0
ph7GlwleFVGav6rIa171qtRiAddXJjRrHq8MOiVQ+8rUcAGvn8r4X8AjKJsYrSNK
S4pcJdC/i9eHtVvO+43Jn1bkRPpysbSbl7D8A2Lwv7QLA+FlWLjRLyWmaVhGDGK4
9dAv7TKwKN+mG+L6MDEJ4MROQFvaEfo/KUY8RWGsAfV9CQvnesjX9yWsM3zE8vlV
1EbUDueQeFHTmvDaIVAs7YIWucJ41r2uzOaFVRIXI6ocBvd1cJH72KsQZNvGwi9G
4egyLzzP8wpGseIVTCUT5fvWqR763eqFLNC/H6nRr27G6SHybtZjHnolQqOfGqvR
2+I4Pfgpi+T84L1qVLPdnrR7mvG0N4MmarPGZ3PkU0nykX+LMk+eSS31F8Eq2SWH
qTH81Q/KIrGbmPsJajbF7hl2hGwK8976iAZEagH9mhI4TkPo4io97upxGkIRp5BT
Wx5w6svTUD2u0uOuHqdBHydDH1fbPP3FJZN7aNRSi+53X+MslkHOCncv7FnUW1mJ
FosCaJr7EtQQdoEqWvWMHoz3SNoNK3ysYDydesuqW1l56XQX3e8UuS53FrlmlpYW
didta5LRhTRJibOC67VzuT3c+1B311qN0lS/iXx1KtlaiGCoSaPF5ZSW0A1cvqvE
XUFivUrXbraVlbLoJDW6M8ImCJE294R6fh02vyS/aN58ykMbvNEz20aNanBtoz1V
YOnEomshvK0A8WShh/FH2kIi1o8k+q8F6Uya05UpngyiW9mL6ZPM36i/mPrnU/8N
5Gyyjvqfp/7XqP89Sr+XtCW/07AES2vSxRJP7JZEMtDCz0GHW1qSqZZWZLalHU3T
zsK3BAJYvcA7bNQNHHUm/CIfVjesjzh7RTUGEX4kiq3FxYQ/YeF57G8qPeQDfZKg
xzYIP+QMetwhuYGaswl/0lqn0iPueZUesnpNDYP/PcL5QRl7CX+lii3V72pa8Jug
1iWZmi4Wng5xdgunRfqBFp4nNk7DLXx7hYuJUy3cRvrZFr6Co4+Jx1X+OpjLBkZs
p5AvZIT6+d9OeZ69tQ2VP4AAO1RaJbbBUAi7Sc7cCE+yJFW7l4Lw1RZOD7ctTHNX
hVWnB+OPqRs2bMwyw7Cp4+Gb6cZMTw8hKvFV7E6OfIMe+S9pppWlRFUvi12ejFK8
wmWI/Fc35/nDPbVFVa7/DZWMQMNJH4fcBUIVJ0MfFyhdbeNk6OMCpattnAx9XKB0
9REnQx9X23Qy9HGB8vQXJ13qtKekp5IIC24psvuRaWmpKWkISE2x29PhSMtISe/L
HFkpaYw2KyWrbyZ+Xyk1Hfd0EpDaloUAe3pGH6z99vS+KSygTxru71CK1D64SGNL
ycjKtOM+T6YtJdXGCk5Jy7LDMXqwcoFiQ1xqBmj5X+lSZ0NnNUd3qVNedCFrLDqh
XHQFoum/KNqm/NLjWdTuTE1P1Z9O56oL6ew0ns1ZhD4eR6q38qPpIyKnWex5FUDI
3TR+OTXPk7cIn9XUQylGi5kONhYSsItFDH7UDTf14UbdsRgLup6qG2VgYRaL6IWE
54+64/6Q+IjYRXh+WLRK1XSgw6VP5IMy8XALN2SMh17QYGG8W02LBXK56gbEAokF
FUAbwIgFEgunsQWSneeaC6QeIn9zgRQIFCdDHxcoXW3jZOjjAqWrjzgZ+rjappOh
jwuUp784aYFMS8niq06WrQ9bdVIzUvrwVSctky82fVPS2TpEl59MviClptjS2KqT
kWLjq06mnQXYszL5qtPHnpLBVp1UuvzIq06mzZ6GlSUrMyWTLWr2lL7pGf5XHWmB
bOis6i/TmgtkQ1og/b8jjKQ5XURC9I4wR7r4Y74d9A+Iwf/bQXQPNCmEh6EDo38b
ZZqGZcS0B7cemAb+h8akY0//dhD4q49JUQ6DCwZTBEZQlVu++KMfU2IyQzgg3g7K
NwdloMeBDhODSAMYfTuIiQf5Oiq4HxTa20FMRfpYvlvnE7JWO0xW2NzOJHxyhRE8
C1oB7e0gAUG1dWXTSodwhj8wkHRf/Wv2EfapAygxm8ozuy+hCOzyzJfayoYqgCE5
Hah85YMKGFnZxCMM/3C6ulCSVT9eMosrKdWF4jnjQzLOju8rKf71HekrJ3LyVTnj
V1R45cQhr75y4g1y8Mp57tsYq5x+T1I/lfO1tr7C1tZm5tp66gEx+F9b0azm2tq4
TE3WVnkUIN1DdIj6ChMQwx/rFegcFb7WVtiAv7VVzFp6iLUVDIo0gNG1FV8fI1/f
a6vQolF9bRXpRe0gPcy0eLiAHxOV4Fl/ZON145RXyt8863ttFOwJCCb0MD7D8krx
T7SrVwpPQfDLy0f1SoVobZQrF5rlg1cObQnoKyd2V8ErF4K1MfSVq742vuJoztZG
sI3y/Kj/Uxe6UeH8J8MAcIgnZNhqZqc1IAax0EEuLdgO95GI6dFPxrVKEHKaS+zU
ABb14mAYO0URLbuK3EK0/SXSaPL11fYCWpw+DZpLhBXS0u0eSkKqHKpDakG5lMmO
lmxKF2Gt2MAIYx1cQF3NGVaTXDUERqYCBBcCckpf8XcyCfG+y80ZnhAAIa0JhivH
oWxmKfkOTxBQNU3yR7HnPfFlB55VpBxyVziYXbie22X3cnvCBsm/ifX/MJZDOJVu
hBcPAhMd/v08h3CWQyQd7VHkYfZZOl6QGMHqd9O/ObGgurwQV7OcBGqfkz6lHqDZ
WCle8wj4/nWRQHiMKMS7r/mCsXzFtgEIni+oNzq86wDbWFlyrYOXZTxfPMkKBM8X
1Po6gN5YWXLOwcsyni+f/ziC5wtquQ6iHsbKkhG8LMBYvnXrS8IYK6th9iUY423e
MPuSoDVWlozgZQHG8q1bXwKt8TZvmH0JtMbbvCH1pS6Vi/QRbOcxluG5bHj53kM+
+rWxhwqOYQ6PUwV/9DUGufQ5rIbADUy5i19ki9hFakk3qvZNqr2R/So59gC4kxAA
toGcoIsqCLl7Ad7boahmk5itCcIuCeIch8epQghCn6sv1EoQnlgDgkDP8QWegV4Q
+hY8bQWhPgxIW+oN64HjbGjwLbGfoeFY4GC2SEtt70+zA6NWgqi/oSEYEPDuEZus
NesR2pNMcNRKEPXXI/SPFqetICJ5sAcTvVaN6kMjsCDqfY6oydDQC0CAZ6AXhP5d
bN16RL0Lov56BM5cZJyGgmjDNoWAUOzTid0cVTfJ7JyfV2jJwM7sWErePsvvAJYM
7Og5cJUVByiVHQjo5lo/i1ofvz9hhZVEL4rflsCP7NomEHKILFQr8Cl5gPBmEbzC
Rv56c4jR1ze8pUYIr2GSV3hLMrfa2bQM35thUQ9fUBxcZtHkuojK6EFxz8Q9ErEu
ukPcHXG3R9wa3Tfu0Tis2zWXGQ5K6x+ybIBulUsILx+HeZxn9pdV/0ZVCLpDxeOr
uV243hFD+OEqx+rV67xsAH0wnLbCXFJIadEzwojDE4urctXR3ZPnCpJl0d45Cci1
AGXgnRDIPBXmQCL9yayAnNXlkhsQBYthBuZ9VUBA5CVOK1WcpAISHAm3x6BeWliV
gxuHA4OYJ3EM5AaodHjbAG9GnFx3c9hYXYsiE8NTmSuOnB9WmyEhi1wPeUj0iTke
e2v8IxETYj6OnRl/e4Qj5sfYyvjGNyQAnE7rh8STapw6JKZOdTBbnJrHPEaHRES1
/a030HvCQjAkZMi14ENCv7WU4WdIiI6jh5yVU3IDomCjQ0JAPyRUI7s9Rq2X6g/N
kDgnsneYGBJD6m1IRJH11sPxWFnfs7ZK4CtrqwS+sjaeIaHfW4ATeW/RQ60H353I
4BR45Vdz+Yo6+4ImX+xc/hXRj+1cNlDZYucCO6zJyTf8T5BvGDk/slPUmXHnRE+J
HBp1NJZEz4mcHPV57D4qTJtFlW+3GsjXwpXS1C/08uXjHPAvQXn3KOJakt6shted
5HPG7TTuClbPPirFeZX8ViB2IK3ptKQGU3njZqGfiwS9iMKScKYs7E15NNnUl2/C
0PS4yZCismqlq0Qk24kUk32khNrnOWrT3EjJ868OrbmLolYnfBe9JHFJ1OsJb0QX
JT4W9VnCxugxiVpzW2vU3NZG2NzbCG/ufxBoPKze3GhsC04sqtRgKm+cX0wY43IX
OfWti0e4aLInJXjr8jaqz9Z9P9wSW2W9Ju7n8C6xK6yT4uKsA2IXWgfhkaWWrfs+
3UZfQ9PDhiqFKqtmI/xnGj5JtbvQcDpNe2yEx1Eb5cMeQMMXSjbC/bXuwvDatu6e
E7x1fzjhezBDir5ad2KDb91D8d/E7Em4L65lQnTsSwnuuJ4JHWPXJVxCWbSH17x1
7eHWbnvo1PQNXYlg30fzORSv2Qh/iYZHx3LbTcNbSjbC11G7o2qDj56SjXB/rXtr
TG1bd02QsYs9vQWHbFVqMJU3jtwmpqrN25WgIL7jrd68kYy1P6+R40hR/KDoUYn2
mCXx06NTEhNibkq4JrpV4i90y61YeSNH1WC/o1hBVd/w3chA7RoZ+zTkgEd43qxW
1qw0rlLQ9mSUOYN7qXdS+eO+3KKiFfm5WLjaghfVoQW1XKtDbsH90eMT/0NbMCEm
LfF52oJdY9omroo5nVrQorYg3LwFI/y0YO7IhtaCCeS6iMPx79BnDjzLwdwecSL+
nxEpdFILC6v5M0cYT1DP0Lcglz+wkmSKQAOQexvyW6mgPdQqDMSf2sg9EJq23MVo
EbY/BJY7Uode7m0clZUo4SbLtWxF7DGoKL9gBcsERzzXESWyegVl+AuXARJBh4Pj
yspKsnPnTjJ16lTmh71v3z6vw+XGQNMU4a+uRuTR0GhMmDBR//ih0kr4QnWAOMK1
hQ7PZUEXBxMmTHjhAEmyaptYQIwifyudkdXQpDFpTJrGS6OtrVhpxdrqj9pIjiaN
SXO60WijiFrmKDJpTJpa0GijyErM5zwTJmoDbRTh6N0cRSZM1BzaKMIdHnMUmTBR
c2ijCHelzFFkwkTN8YOj0nG95/qHpn9ureeyPz/RX8d+t4IOuGof0nC/Y6BGgWsh
8j0Wfk2kyjEqaiQNnjQ7vyib2spZhMydfOC+HSPapia9Gd+9XV7yncdGffRLRI8f
czdMbj4oaVSnNZGP/9yyuHl413f7HZ605FBcf+uN/xx28OoWqzq2f/N75+70vRdZ
B7Xvfvg/3/93+7HsDge7PpeWfV/nhV/HLrxri3tT1Cdbjq6c9uCQHWuSTqyOa3HZ
oZU3tr0oa9AtyVsqF7X84Nhz+x/ddvcHF6+5LaXt2vj5X89b+otzebNL2nyUVvZb
+JlXL0o/a/Y7N/Ycc6Bt+t3276zKyQ3kig3DN76y7vi4hz/8LPmag7uPTPp87aaC
5/q2S7j5oTEk9Y1+Y1t9WLTj6nMn/Xvirunh7371nHPbXyvPe2ds1Tcju97x/Yob
Phz133tbTbnsqs4dxv/y07E3516SNXzx4aIOb/zT+n9tP/3m5Y+ji98t2r1rbPHQ
lZdm7vjvdPcDW5dO+KZ56/Y9zipPynvr/ccKLk5OjW52bNm15/WMmvZzUspG5b0D
rWN3H3l4XaeX7v2jKH/tK67Fn34+6auxn3YfGr65XeKkWwqzMlxHbcesR5vP/nK/
ZTNZef2U9VUPpG+dMb1H+5Ovb7FNvPOBr+d1mXLX3CmXz3/q6NfuD36Y+9MzW3JH
F3d4ddDX19/zzPy2Dw86dP4fXd7fd9OL1/64/ciuXQcXTty649aLUreNmrb/h8tS
XyjqmZDW5duc2YuyFl9y/2b7KwlTnh1uO3KT/ZXdn3Zf9nb24tTMsc4vdy6ff3TV
kQ43rex3dMX8EQMeXTX6X49nXLr/j5Wb57e56on5Tx3fFja1Q7/sY79esMyy8e/d
jnz12MhnH4j4qmr47Y6Ltn5ePGnAnj8KO+86e9Vs+83F29u+/O6hLdvL1p9M/PnT
Z/ZOcpYUNlcVJVpoR+xC7VxXhbt0Rnk++9VBPx87EFNrYhBUQgz+tSZyZbEW0onY
STL914mKH7flIwm0JuLSJOYBYvXWmgjkqnfGxNVJYNjSc+j/gQ4e7h3H73GJy3LQ
66eFBdaaKOfES0h1/FhZaBE6O8PZHOVby7Saz2kCfdv4A2TnD7xFDi4Q/oOkv0X7
nlkkFDYkP8hVoqjD8bQFZOQPh/BhmjQSTASCkKTW7/j455D7nfa7suovyJ6GkPud
GLnC1vpdgM5pQkX1fndKbnA3Uhib70wJBoeQZISCT100sWp7IKsyhtSPLH90aNqn
YYT2aVklA/ZYAt7ap/U6IPi8o0FO6Ss+kPZpGPQgX5qfhf4lVUsG4ftN7ucaIJux
3KLp00GszxxsDm9/H8nPtYFFsRziSDzdM/vKIbj2af6zAokkif3+3mBSXV566OWj
B2gaYk6m9mmO4GUZz5d9vqoieL6g1tcB9MbKknMOXpbxfMGNQPB8Qa3XegwYK0tG
8LIAY/nWrS8JY6yshtmXYIy3ecPsS4LWWFkygpcFGMu3bn0JtMbbvGH2JdAab/OG
1Je41khxYq7tPDbOPGfP8vHLsivDxN7Dj4pdQhzcEmkPZcvapzt5XL6B0gW41she
BL9vjV6CUzuECP9g5gcH3D+X+VEW929gfuyuuP8L5kcO3N/cAj92Btw/hPmxm+P+
ecyPynL/E8yPfST372F+yIr7W4TBDxf3D2V+SIn75zM/5Mz9G5kfSim5fy/z4+yS
+1uGww89k9yfy/z4TJv7VzI/wP0fML8mD6sVfk0emcyvyeNy5tfksYr5NXl8yPya
PCIi4NfkkcX8mjyKmF+Tx4PMDxf3f8T8mjwiI+HX5NGP+TV5FDO/Jo+HmF+Tx07m
hzyCaBUNpmfWWgutonyggA0Z2vaYD5RJzK0NlPpUr4qBEkQQntiQC0KeL4HTVhDy
pAv0cSQz3Mmmw+oqmOWps6XD41QRWCenN6oLAggiiGBDo/bayYWyXYG6aR5uxEq5
MYHJOG0FIWlMZjhttZNzTSsa6tYj6l0Q9dcj8J5VxmkoCK6dHCyLJbS+tJN/Yf0s
qlP83xLDIkj0ibiMRFM7ub+OoqliXhZREtMnul/CCxFLY5KiWyU8GDE/pls0dOU0
Hr2oXBUzdKJBOxQH45x6Dnqo/CHFEVwVMw6gw2i/TWY/QFkQ7v0SGKqYq0valypm
mWu5Fpwy0BEuyJjINSARb6DqQFZ6lkQjiYLxHIPB5U8Vs55eQI1mHOncHqOSqf4q
B2FqlytVG+qYYcMACOe2KBM1EzdEhCrmieFCoVgn0r9WQ0JXAy9oQ+LsaHtMVVy/
hJzocTEr4lolnBd9QcyzcY1xSECLYWS1IVHwu6DyB5ujusJ+YQQwJKBquH6HRPU8
NLDO5U2ARP6uZ2hdq3qYKDjQkEDl9fQCKglT0q8KykthP9wg08JDMyS+iZyrDokn
w2un2UtXAy+IIRFF/s96OB4ra9uIVgl8ZW2q2smj1d2JDE5RO/lqrVcdmnyxc4F2
cuxcmrZ28rg/Qb5h5KbITlHbY8+JfiJyaNRjsST69cjJUUtM7eQqBdesiYXCgl9t
rxIpe7LfcPd9HVOv4BhnAMaUk9e37tswcrxZ88S/xYQldYjqm5gR80Vi36gRiWfH
bJOUkzf91rZbeGt3tfhWcIyLFRaMzyqRsicbrdoVUH0L4ymuoaiw7ms9EN01Ymn8
JGtyTFhESXy5tXvMfus4/IBMLVu4L2VkKU0P+wBd+rtGaDbCJ9HwEtVOpoKiM7XH
Rng5DUf5sLvT8P2SjXB/LbwwvLYtPFQdz6NO+h7PuPhiQfoqkbIny01/2bIht7Op
qjy4qnJstE1V5R7TOBVdY6OHHNBKvFkTWLPSuEpBa6oqDyVC3YLhagtGEtGCiX5a
sCGpKjdVN9eBpinCX12NyKOh0ZgwYaL+YapuNmEidDBVN5s0Jo1J401jqm42aUya
utKYqptNGpOmrjSm6mYTJuoKU3WzCRN1ham62YSJusJU3WzCRF1xalU3tw7jqpub
UfuSVkx18z2fj3jV1vLNxY+1vsZ625TU/bFtDl7cqrQyOvXa3FdvmD8ksuV92+++
a1vlyD03JL5yQ+mXR47F7f6w5J6Nt3aMvnZC8w9/eWJrxX9OfvfduKueWxFPHHvb
kGfif9vy7ILx7zx65ewXlm7bvX+5e9CdJzK+u35M80r3J9esjc+96JfSvgm77//o
8qqVHeaOeHeTq431l9z4rKgrn2zx80/92vyxaMi+j3csOvD32cMujbjkMkvVgjMc
z24/o9fZee98W353/+f79XrtseeXl1z6XXFmu7A7psUm3XVp790pcZ98Fr/nnSef
7vvSpgHzSjtuebYqp9U7A79+pevG5n+/dM1jBxOH9Jy+tfnsb6c8fzDq/Ng2LZ0l
kyddecsFvf/7wP/tmjGh817n1oMVGZ8uvfKeb9+1jjwSkdRjRtKTOZd0vbrZh3G3
Rb7T0tJ7b8sLju5ZcSAzrPj9J5vfVXHlk+T8Vh2Ttoz+d1rEpwe2jrmz3xPlL/+Q
Gb3zoc9n5v31nGZvD9lw7vUL8v41o/WTHSJe2Lfnp5vPmPDwzFkv3T/8zd5XxPzR
/ulhi+58uizy6OZHRr/82wuxM9a+kfhgpxG7llyUMWha8f9mtruhzdqbf7pqpvuN
3wc9ffgq+3uDH56wLWza4R/KU5/5aHflfVeMWDSn9Xf2if+wnxl3wbnOvoOu+kuv
q+9/6/zlDw0vLPrYfnNS2ntv39Rt2RtbFzvLHn5n8IYXDu/fcaR9t2a79ruOPjt/
0oCNq8aVRuyMverkH6THNcvCZBXMYeyDBn+XuJWBOaNN/csGUQkx+Ne/HKbKaS6x
UwPwe134cLBQ9QPe+pf5xSoh30D33rQ4fRo0lwgLrH+ZQy5lskPTG4jJRugNBOcC
sp4Db72BMhUguBDQa0jQxwfSG4ha4bFY0tmnrHAwe8l6bgs4npL8XHdPLMutOW2j
lj61/gXXGxin8tOKpveVQ3C9gfEshzbkTCpTYzr6BFa/m/7NiQXV5YW4muUkUPuc
9Cn1AI2pN5AjeFnG8xUfywPB8wW1vg6gN1aWnHPwsoznK88PwfMFtV5fHWCsLBnB
ywKM5Vu3viSMsbIaZl+CMd7mDbMvCVpjZckIXhZgLN+69SXQGm/zhtmXQGu8zRtS
X+L6XHCvXwLdeZS3e/OKdm9aHPAG1BvouMMhnAKy3sBgqJU+F4eINaDPRaX0A71i
mxbe0brt0KlVhwYEEYQn1oAg0HN8gWegF4T+W5HTVhBn8GAPTlu9cPhoWkbddD41
YnVorXmwB6etIPRfbZ22euGg8EVG3XpEvQui/noETllknIaC4HrhkFwcE9WXXrj1
1s+i1sfvT3jPSqIXxW9j2lVMvXC+oCnBeiLKHvN6bL+E96PGxayObZWwOeqCmM2x
jVEJFjoljuI4z+wvZeljoQTL36EiU4KVqH6iC6j34Jh+J+A3SyTro+G0Feayn9hD
zwgjDk8K/bsdDl9KsLRSvGsBSh9thT6OJGCBWp4KcyCRnKEeXBDVdVOKgsUw86UE
S4ZgTJxWqhCKr2S3x6BeGtdVDm4qHVwBFqBXguVQ4wUE95M9SrCORwglWD3Ca6dE
SBa5HvKQKFGHxFJ1SMxvpEMC9cf5dk2HBFQlykNChSS3E6z3hIVgSIh2BuRaBBkS
YIH4HBJyhnqEakgI6IeEamS3x/B6Ca5DNSSEQoMe4fWnKjGKrqyH4/nK2iqBr6xN
VS9cc3V3IkN0w9rIV9TZF05HvXBn/AnyDSP9IzpFtYk/J3pqxNCon+NI9NyIyVGf
xZl64Ti4GhOoArXQHEiVSNkTvuBXCvSKpfDOvKGoiLsxYnXCe3ERSRsiXk9YH7c3
8bWIzxKWxr0tq4hTatTwCiugXhHqht8WRLEU3qFbyLl0rVGDqbypjwymzZ1fUuBU
ppeXFrPf8FbcpUoBa3OoFZs2a9q0Ime8vvnxtGdMr9i+em/+vlZLbNeIa+ImWbvE
hkVMiiu3Dojdbx0UpzV/TfSK2SxWpj/umjiuP84Sy/XGCRvh0Bs3SbW70HDojRM2
wqE3DuXDHhDL9cYJG+H+mn9heG2bP5j+OGwQoT5YHvfURyaqasUUUrvWrf/BbWqN
C641Dk/EptY4j2mcOsesaiOjdXizJrFmpXGVgtbUGhdKhLoFI9QWxBEob8FkPy3Y
kLTG8RZMINdFHI5/hz6e4LEP5vaIE/H/jMCJSFhYzR9PwniCeoa+Bbn8gZUkk2Dm
4Y8nPqsuQe5tyG+lgvZQqzAQqWsj90Bo2nJHr4bc+YrjH4HljtShl7upJbEONE0R
/upqRB4NjcaECRP1D1NLogkToYOpJdGkMWlMGm8aU0uiSWPS1JXG1JJo0pg0daUx
tSSaMFFXmFoSTZioK0wtiSZM1BWmlkQTJuqKU6slcWQY15KYTW3lLKYl8b4dI9qm
Jr0Z371dXvKdx0Z99EtEjx9zN0xuPihpVKc1kY//3LK4eXjXd/sdnrTkUFx/643/
HHbw6harOrZ/83vn7vS9F1kHte9++D/f/3f7sewOB7s+l5Z9X+eFX8cuvGuLe1PU
J1uOrpz24JAda5JOrI5rcdmhlTe2vShr0C3JWyoXtfzg2HP7H9129wcXr7ktpe3a
+Plfz1v6i3N5s0vafJRW9lv4mVcvSj9r9js39hxzoG363fbvrMrJDeSKDcM3vrLu
+LiHP/ws+ZqDu49M+nztpoLn+rZLuPmhMST1jX5jW31YtOPqcyf9e+Ku6eHvfvWc
c9tfK897Z2zVNyO73vH9ihs+HPXfe1tNueyqzh3G//LTsTfnXpI1fPHhog5v/NP6
f20//eblj6OL3y3avWts8dCVl2bu+O909wNbl074pnnr9j3OKk/Ke+v9xwouTk6N
bnZs2bXn9Yya9nNSykblvQOtY3cfeXhdp5fu/aMof+0rrsWffj7pq7Gfdh8avrld
4qRbCrMyXEdtx6xHm8/+cr9lM1l5/ZT1VQ+kb50xvUf7k69vsU2884Gv53WZctfc
KZfPf+ro1+4Pfpj70zNbckcXd3h10NfX3/PM/LYPDzp0/h9d3t9304vX/rj9yK5d
BxdO3Lrj1otSt42atv+Hy1JfKOqZkNbl25zZi7IWX3L/ZvsrCVOeHW47cpP9ld2f
dl/2dvbi1Myxzi93Lp9/dNWRDjet7Hd0xfwRAx5dNfpfj2dcuv+PlZvnt7nqiflP
Hd8WNrVDv+xjv16wzLLx792OfPXYyGcfiPiqavjtjou2fl48acCePwo77zp71Wz7
zcXb27787qEt28vWn0z8+dNn9sraFcNpR+xLDHwKMWWOyz1TmTErv6LClV+iFMwq
n+0kpsbFIKiEGPxrXAxX5aTXuNiaNHSNi+LGGvLBdrwVy8Gq3t/kkD9FlDWKyEo1
VpObiJaTnBoQHAr4+7hRQK+3RB+vV+ehj7+T3YAFJ2IKF+YMTwxqi60TJIJJXNKs
uGmlg9kTNnC77F5uC+2OzM81LJ3Bcm1L2pMOPnUzBtfu2Irl0I6cTRSfOQTX7tic
5dCRdCKdiTFNigKb7ja1O/qGsXy1TwmN5AtqvWZE2MbKkmsdvCzj+bJvPlQEzxfU
+jqA3lhZcs7ByzKeL7gRCJ4vqPVaBQFjZckIXhZgLN+69SVhjJXVMPsSjPE2b5h9
SdAaK0tG8LIAY/nWrS+B1nibN8y+BFrjbd6Q+hLXytSWB0k7j9u/yqT/f8mGF3sP
5KTJyEaKhNOxwMFskZba9a7dsSZ6ulRKP9Crp2rvHX36KjXE9zYyTltB4JxFRnXt
jijA59BoWtodz/aOrqPmtkas1FDhwR6ctoLoyIM9OG21O+qLrVuPqHdB1F+P6MyD
PTgNBcG1O+Jkvv61O34ctT7+UMJ71uNRi+K3m9od/XYUTZXdPZHrYmbH9kv4R+Rb
MaNiWyWsidwUc1mjVGXHDxH1qux+OKESSYeK/2nx0aB/7H8h+9u/5bv+/tF5Dhyd
Whn/v1ki2X09QNgA/xzZW5XdQM9ZbnS1t1KAL1V2Qm4A3OIgFpT+2ooDlfVUmAOJ
Ap3qYcgB+4RDhRCfGGbBVNmJ5OK0EoDmRiogwZFwewxaRwurcnBT6fCvyk62Ad6M
siq71RF3qFoWFAsao+ZDQha5HvKQOKYOiXaxfEhYYxvnkAB/ON8OPiR+jfrblK07
/5n9+7nX9v0wsrs0JAg5wa6xAsIGuGaE0A8JMcHXekiIInwhVENCdE55SEBzIxWQ
Z0iobq8hoYWFakg08wyJ+2s9JPSviwS0IbEm0k5XhX4J2yLHxQylQ+LJyAtiJjfK
IYG3RlCs4j0k9vgYEmqICpsjKqAO4N+nO33qAJaHhC/4GhLypC7Xws+QEApPwQLx
OSQQKzKSMwRElfTzoqAzOiQEY95DIrgOYI1rI0PCocYL+BoSQgewYqmdBhC9hGTI
Q6JEHRJL1SExv5EOiUjCtUXVdEik6IaECk/urS9916cO4NoMCXlSl2sRZEiABeJz
SKCaIiM5QyBUQ0JAPyRUI7s9BmxoXIdqSAj1VIql/nUA4/kLOoDx/NVUdQC3VZ9h
ZYhuWBv5ijr7gibfL+jzLdcBfDyqaesAbvcnyDeMnAxrFzUusUN053BHlD3xeNT5
4ROizkr8kgozTdUWWRMdwGnhjVEH8FWqLtCbTvrWBYonbAtJp9OSSNkTvtpdfNOr
DqUzBWk4eoEfTngvLiZpQ8TbCevjvk18LWJvwtK49xKlzlADvcC0MyisgHpFqDvD
dsI7QxXxrToUt6+arF7gEzFdI66Mm2TtFBsWMT6u3Novdr81O05r/ppojk0L53qB
r4zjeoFPxHB9wMJGOPQBj1ftTrGE6QMWNsKhDxjlw+4Xy/UBCxvh/pp/YXhtmz+Y
XmAcLZh6gZuqXmBca2zEeoGbpm5M+GgF2DALBM8jFuF5euvGROrayD0Qmrbc0csh
d/VnXf0isNyROvRyN3WS1oGmKcJfXY3Io6HRmDBhov5h6iQ1YSJ0MHWSmjQmjUnj
TWPqJDVpTJq60pg6SU0ak6auNKZOUhMm6gpTJ6kJE3WFqZPUhIm6wtRJasJEXXFq
dZJeH8Z1klZQ296B6SS9/18lLVKTtrWPGTBm9bgeeXdnDygb/Nmd4y5ZumhM7m03
RTUvu6XvzZ8+0PP7ty4f+Gr3Oz4ML331jCveufyQNXfhFUWlj24ZMSi8Z/EVD1/2
yeST038o/fbTR4r/uLrNpZ0X9t/dcd1/1r7WtuzkE0+P77Bp3dhWndqNyx/Y/p/j
975yPKbjNwuvXhjbfe2vpZetuH/8wLNbtHd/FFn84WvKErdyfv8vX12U8spXGwqP
pz/+0ea/DZj69D9WfZR3/5LJ5PDWmKlP9thZPGHn7o27Jl3Z6YezIwZumdNmzsoP
ui6Lfvqu/1Q+NGHOg2/0OfjiuYPPu3LIpUfaflo1490da+O/GPN4p5QpqfN27ul5
T8KCBakvjom75PMLp09+480jn+x46S/3nfHNyMPvzVq8au0zT7121RHX0Xm/9Trw
1u9Pz3k+/ckvrt58cYd73Ms/O/eRv5yR8o8xfb6xrcnb+13VxGnT2kbuKY79ZELL
M38mJSuVH2+7MmHT2X8ZNuSlJS9/P3XZ3i195zw668fxz60d2HnzysR+w59/cdSz
89tcMujlu3pdMoB8MvXQ8dvsMzd0+OXAXx7+asZHN3x38841ymML17zabNJHN3zw
0QvLpv9v8YMHO108a25cszvT7jjy8rMPdH1p1lkPDzp0/6+jZh6/pd+10z+e17/D
o9s/dk2ffHPqPcmjx49f/OL3037qmzbtxF9m7J5z5ws3vxDdMfuWp9+e2WfStq5t
jvT9qe/bF/Z+q+u50SfXX3z7Hdm9ClrcOm/53OVfr52Ssnzqt3F9X9n969PDftr6
7/xDg/79+oY5e3f9tnJrjz3rJg94atX4f214YcX8KbHjE6+fMfbggyd2krLwyN7H
brx3+FD3g11eTHwsfM2ulwpa7H4jeuaZs+f3mhH52ciUUX/Evn7xI1cuP/L4O+OP
jRqXmXYi+tzw76xcj2kmu0OEzouPZ/LKSy9zFrgVV8n0UiWVcAWlMsRdICN3h04D
VOKPLCN+hxKyEaf9HPqfZueXGZexa181wXmOYnapEvL3XEqrjHp1wMsfW4rx6pGh
hJU2ZG6Zs9xV7CxxK4Pz3U5Syi5rjiid3Ss1s5fdZrcRngKclrBrblKKYYMpPasY
J0JVStQM3M5ppaWXVyPBjFfC5ji1G3lHw5QwZRBaMc5ybxo8TJewiZRm4S4tKC3y
jsdjQgkPUMNvIecQz8vW7Leivrtgx/btF3CvN7QpPVPt9Raz19cKlfhj9voG0+vf
HXDAUK8Pr3TIUbWExfH/AAAA//8DAH8ZwAY=</Template></GraphPadPrismFile>
