# Supplementary material for: The interplay of RNA:DNA hybrid structure and G-quadruplexes determines the outcome of R-loop-replisome collisions
Source: eLife journal article supplement (doi:10.7554/elife.72286), 2021-09-08
Supplement: fig1-data5 [file elife-72286-fig1-data5-v2.pzfx]

<?xml version="1.0" encoding="UTF-8"?><GraphPadPrismFile PrismXMLVersion="5.00">
<Created>
<OriginalVersion CreatedByProgram="GraphPad Prism" CreatedByVersion="7.0a.118" Login="kumarc1" DateTime="2020-11-18T11:33:17-05:00"></OriginalVersion>
<MostRecentVersion CreatedByProgram="GraphPad Prism" CreatedByVersion="8.4.3.471" Login="remusd" DateTime="2021-09-05T00:17:29-04:00"></MostRecentVersion>
</Created>
<InfoSequence>
<Ref ID="Info0"></Ref>
<Ref ID="Info1" Selected="1"></Ref>
</InfoSequence>
<Info ID="Info0">
<Title>Project info 1</Title>
<Notes></Notes>
<Constant><Name>Experiment Date</Name><Value>2020-11-18</Value></Constant>
<Constant><Name>Experiment ID</Name><Value></Value></Constant>
<Constant><Name>Notebook ID</Name><Value></Value></Constant>
<Constant><Name>Project</Name><Value></Value></Constant>
<Constant><Name>Experimenter</Name><Value></Value></Constant>
<Constant><Name>Protocol</Name><Value></Value></Constant>
</Info>

<Info ID="Info1">
<Title>Project info 1</Title>
<Notes></Notes>
<Constant><Name>Experiment Date</Name><Value>2020-11-18</Value></Constant>
<Constant><Name>Experiment ID</Name><Value></Value></Constant>
<Constant><Name>Notebook ID</Name><Value></Value></Constant>
<Constant><Name>Project</Name><Value></Value></Constant>
<Constant><Name>Experimenter</Name><Value></Value></Constant>
<Constant><Name>Protocol</Name><Value></Value></Constant>
</Info>

<TableSequence>

<Ref ID="Table0"></Ref>
<Ref ID="Table3"></Ref>
<Ref ID="Table4"></Ref>
<Ref ID="Table8" Selected="1"></Ref>
<Ref ID="Table11"></Ref>
<Ref ID="Table15"></Ref>
</TableSequence>
<Table ID="Table0" XFormat="numbers" YFormat="replicates" Replicates="1" TableType="XY" EVFormat="AsteriskAfterNumber">
<Title>Raw CD &amp; HO ClaI-Center</Title>
<RowTitlesColumn Width="39">
<Subcolumn></Subcolumn>
</RowTitlesColumn>
<XColumn Width="81" Subcolumns="1" Decimals="0">
<Title></Title>
<Subcolumn>
<d>1</d>
<d>2</d>
<d>3</d>
<d>9</d>
<d>10</d>
<d>11</d>
<d>12</d>
<d>13</d>
<d>17</d>
<d>18</d>
<d>19</d>
<d>22</d>
<d>22</d>
<d>26</d>
<d>27</d>
<d>28</d>
<d>29</d>
<d>30</d>
<d>31</d>
<d>32</d>
<d>33</d>
<d>34</d>
<d>35</d>
<d>36</d>
<d>37</d>
<d>38</d>
<d>38</d>
<d>39</d>
<d>40</d>
<d>41</d>
<d>42</d>
<d>43</d>
<d>44</d>
<d>45</d>
<d>46</d>
<d>47</d>
<d>49</d>
<d>52</d>
<d>53</d>
<d>54</d>
<d>55</d>
<d>56</d>
<d>57</d>
<d>58</d>
<d>59</d>
<d>60</d>
<d>61</d>
<d>62</d>
<d>63</d>
<d>64</d>
<d>65</d>
<d>66</d>
<d>67</d>
<d>68</d>
<d>69</d>
<d>70</d>
<d>71</d>
<d>72</d>
<d>73</d>
<d>74</d>
<d>75</d>
<d>76</d>
<d>77</d>
<d>78</d>
<d>79</d>
<d>80</d>
<d>81</d>
<d>83</d>
<d>84</d>
<d>85</d>
<d>86</d>
<d>87</d>
<d>88</d>
<d>89</d>
<d>90</d>
<d>91</d>
<d>92</d>
<d>93</d>
<d>94</d>
<d>95</d>
<d>96</d>
<d>97</d>
<d>98</d>
<d>101</d>
<d>102</d>
<d>103</d>
<d>115</d>
<d>116</d>
<d>117</d>
<d>118</d>
<d>119</d>
<d>120</d>
<d>121</d>
<d>122</d>
<d>123</d>
<d>124</d>
<d>127</d>
<d>128</d>
<d>129</d>
<d>130</d>
<d>131</d>
<d>132</d>
<d>133</d>
<d>134</d>
<d>135</d>
<d>136</d>
<d>137</d>
</Subcolumn>
</XColumn>
<XAdvancedColumn Version="1" Width="81" Decimals="0" Subcolumns="1">
<Title></Title>
<Subcolumn>
<d>1</d>
<d>2</d>
<d>3</d>
<d>9</d>
<d>10</d>
<d>11</d>
<d>12</d>
<d>13</d>
<d>17</d>
<d>18</d>
<d>19</d>
<d>22</d>
<d>22</d>
<d>26</d>
<d>27</d>
<d>28</d>
<d>29</d>
<d>30</d>
<d>31</d>
<d>32</d>
<d>33</d>
<d>34</d>
<d>35</d>
<d>36</d>
<d>37</d>
<d>38</d>
<d>38</d>
<d>39</d>
<d>40</d>
<d>41</d>
<d>42</d>
<d>43</d>
<d>44</d>
<d>45</d>
<d>46</d>
<d>47</d>
<d>49</d>
<d>52</d>
<d>53</d>
<d>54</d>
<d>55</d>
<d>56</d>
<d>57</d>
<d>58</d>
<d>59</d>
<d>60</d>
<d>61</d>
<d>62</d>
<d>63</d>
<d>64</d>
<d>65</d>
<d>66</d>
<d>67</d>
<d>68</d>
<d>69</d>
<d>70</d>
<d>71</d>
<d>72</d>
<d>73</d>
<d>74</d>
<d>75</d>
<d>76</d>
<d>77</d>
<d>78</d>
<d>79</d>
<d>80</d>
<d>81</d>
<d>83</d>
<d>84</d>
<d>85</d>
<d>86</d>
<d>87</d>
<d>88</d>
<d>89</d>
<d>90</d>
<d>91</d>
<d>92</d>
<d>93</d>
<d>94</d>
<d>95</d>
<d>96</d>
<d>97</d>
<d>98</d>
<d>101</d>
<d>102</d>
<d>103</d>
<d>115</d>
<d>116</d>
<d>117</d>
<d>118</d>
<d>119</d>
<d>120</d>
<d>121</d>
<d>122</d>
<d>123</d>
<d>124</d>
<d>127</d>
<d>128</d>
<d>129</d>
<d>130</d>
<d>131</d>
<d>132</d>
<d>133</d>
<d>134</d>
<d>135</d>
<d>136</d>
<d>137</d>
</Subcolumn>
</XAdvancedColumn>
<YColumn Width="81" Decimals="0" Subcolumns="1">
<Title>CD</Title>
<Subcolumn>
<d>2569</d>
<d>2224</d>
<d>2194</d>
<d>2202</d>
<d>2051</d>
<d>1910</d>
<d>2880</d>
<d>2206</d>
<d>2715</d>
<d>2970</d>
<d>2494</d>
<d>2637</d>
<d>2619</d>
<d>2484</d>
<d>2682</d>
<d>2131</d>
<d>2401</d>
<d>2437</d>
<d>2859</d>
<d>2182</d>
<d>2473</d>
<d>2604</d>
<d>2644</d>
<d>2065</d>
<d>2507</d>
<d>3051</d>
<d>2512</d>
<d>2352</d>
<d>2682</d>
<d>2203</d>
<d>2482</d>
<d>2601</d>
<d>2429</d>
<d>2214</d>
<d>2817</d>
<d>2211</d>
<d>2606</d>
<d>2720</d>
<d>2415</d>
<d>2047</d>
<d>2110</d>
<d>2399</d>
<d>2582</d>
<d>2459</d>
<d>3007</d>
<d>2773</d>
<d>2813</d>
<d>2979</d>
<d>2543</d>
<d>2256</d>
<d>2999</d>
<d>3177</d>
<d>2531</d>
<d>2914</d>
<d>2911</d>
<d>2299</d>
<d>2527</d>
<d>2172</d>
<d>2173</d>
<d>2726</d>
<d>2232</d>
<d>3091</d>
<d>2299</d>
<d>2515</d>
<d>2446</d>
<d>2824</d>
<d>2838</d>
<d>2557</d>
<d>2658</d>
<d>2030</d>
<d>2796</d>
<d>2351</d>
<d>2170</d>
<d>2540</d>
<d>2568</d>
<d>2646</d>
<d>2597</d>
<d>2380</d>
<d>3112</d>
<d>2346</d>
<d>3005</d>
<d>2424</d>
<d>2191</d>
<d>3155</d>
<d>2655</d>
<d>2104</d>
<d>3094</d>
<d>2876</d>
<d>2768</d>
<d>2656</d>
<d>2329</d>
<d>2340</d>
<d>2608</d>
<d>2208</d>
<d>2613</d>
<d>2236</d>
<d>3140</d>
<d>2344</d>
<d>2292</d>
<d>2356</d>
<d>2533</d>
</Subcolumn>
</YColumn>
<YColumn Width="81" Decimals="0" Subcolumns="1">
<Title>HO</Title>
<Subcolumn>
<d>2553</d>
<d>3005</d>
<d>3340</d>
<d>3080</d>
<d>2664</d>
<d>3031</d>
<d>2847</d>
<d>2544</d>
<d>2614</d>
<d>3059</d>
<d>2693</d>
<d>2984</d>
<d>3357</d>
<d>2810</d>
<d>3349</d>
<d>2374</d>
<d>3020</d>
<d>2542</d>
<d>2832</d>
<d>3213</d>
<d>3478</d>
<d>2974</d>
<d>3005</d>
<d>2986</d>
<d>3031</d>
<d>3268</d>
<d>2632</d>
<d>3135</d>
<d>2698</d>
<d>3212</d>
<d>3093</d>
<d>3043</d>
<d>2939</d>
<d>3018</d>
<d>2627</d>
<d>3238</d>
<d>3059</d>
<d>2822</d>
<d>2744</d>
<d>3270</d>
<d>3252</d>
<d>2801</d>
<d>2834</d>
<d>2942</d>
<d>2534</d>
<d>2832</d>
<d>2273</d>
<d>2283</d>
<d>2317</d>
<d>2634</d>
<d>3419</d>
<d>2889</d>
<d>2623</d>
<d>2554</d>
<d>2629</d>
<d>2635</d>
<d>2904</d>
<d>3048</d>
<d>2874</d>
<d>2450</d>
<d>2908</d>
<d>2778</d>
<d>3343</d>
<d>2492</d>
<d>2456</d>
<d>3127</d>
<d>2477</d>
<d>2782</d>
<d>3476</d>
<d>2889</d>
<d>2796</d>
<d>2808</d>
<d>2282</d>
<d>2450</d>
<d>2570</d>
<d>2962</d>
<d>2759</d>
<d>2843</d>
<d>2798</d>
<d>2852</d>
<d>2887</d>
<d>3139</d>
<d>2551</d>
<d>3228</d>
<d>2524</d>
<d>3092</d>
<d>3095</d>
<d>3100</d>
<d>2427</d>
<d>2919</d>
<d>2299</d>
<d>2430</d>
<d>3319</d>
<d>3293</d>
<d>3233</d>
<d>3140</d>
<d>3002</d>
<d>2965</d>
<d>3000</d>
<d>2922</d>
<d>2871</d>
<d>2905</d>
<d>3104</d>
<d>3401</d>
<d>3043</d>
<d>3237</d>
<d>2905</d>
<d>2886</d>
</Subcolumn>
</YColumn>
</Table>
<Table ID="Table3" XFormat="numbers" YFormat="replicates" Replicates="1" TableType="XY" EVFormat="AsteriskAfterNumber">
<Title>Frequency distribution ClaI-Center</Title>
<RowTitlesColumn Width="39">
<Subcolumn></Subcolumn>
</RowTitlesColumn>
<XColumn Width="81" Subcolumns="1" Decimals="0">
<Title></Title>
<Subcolumn>
<d>1900</d>
<d>2000</d>
<d>2100</d>
<d>2200</d>
<d>2300</d>
<d>2400</d>
<d>2500</d>
<d>2600</d>
<d>2700</d>
<d>2800</d>
<d>2900</d>
<d>3000</d>
<d>3100</d>
<d>3200</d>
<d>3300</d>
<d>3400</d>
<d>3500</d>
</Subcolumn>
</XColumn>
<XAdvancedColumn Version="1" Width="81" Decimals="0" Subcolumns="1">
<Title></Title>
<Subcolumn>
<d>1900</d>
<d>2000</d>
<d>2100</d>
<d>2200</d>
<d>2300</d>
<d>2400</d>
<d>2500</d>
<d>2600</d>
<d>2700</d>
<d>2800</d>
<d>2900</d>
<d>3000</d>
<d>3100</d>
<d>3200</d>
<d>3300</d>
<d>3400</d>
<d>3500</d>
</Subcolumn>
</XAdvancedColumn>
<YColumn Width="81" Decimals="0" Subcolumns="1">
<Title>CD</Title>
<Subcolumn>
<d>1</d>
<d>2</d>
<d>5</d>
<d>15</d>
<d>8</d>
<d>11</d>
<d>13</d>
<d>14</d>
<d>8</d>
<d>7</d>
<d>5</d>
<d>5</d>
<d>5</d>
<d>2</d>
<d>0</d>
<d>0</d>
<d>0</d>
</Subcolumn>
</YColumn>
<YColumn Width="81" Decimals="0" Subcolumns="1">
<Title>HO</Title>
<Subcolumn>
<d>0</d>
<d>0</d>
<d>0</d>
<d>0</d>
<d>5</d>
<d>3</d>
<d>9</d>
<d>11</d>
<d>4</d>
<d>14</d>
<d>15</d>
<d>16</d>
<d>12</d>
<d>6</d>
<d>8</d>
<d>3</d>
<d>2</d>
</Subcolumn>
</YColumn>
</Table>
<Table ID="Table4" XFormat="numbers" YFormat="replicates" Replicates="1" TableType="XY" EVFormat="AsteriskAfterNumber">
<Title>Frequency distribution ClaI-Center_with guassian curve</Title>
<RowTitlesColumn Width="39">
<Subcolumn></Subcolumn>
</RowTitlesColumn>
<XColumn Width="81" Subcolumns="1" Decimals="0">
<Title></Title>
<Subcolumn>
<d>1900</d>
<d>2000</d>
<d>2100</d>
<d>2200</d>
<d>2300</d>
<d>2400</d>
<d>2500</d>
<d>2600</d>
<d>2700</d>
<d>2800</d>
<d>2900</d>
<d>3000</d>
<d>3100</d>
<d>3200</d>
<d>3300</d>
<d>3400</d>
<d>3500</d>
</Subcolumn>
</XColumn>
<XAdvancedColumn Version="1" Width="81" Decimals="0" Subcolumns="1">
<Title></Title>
<Subcolumn>
<d>1900</d>
<d>2000</d>
<d>2100</d>
<d>2200</d>
<d>2300</d>
<d>2400</d>
<d>2500</d>
<d>2600</d>
<d>2700</d>
<d>2800</d>
<d>2900</d>
<d>3000</d>
<d>3100</d>
<d>3200</d>
<d>3300</d>
<d>3400</d>
<d>3500</d>
</Subcolumn>
</XAdvancedColumn>
<YColumn Width="81" Decimals="0" Subcolumns="1">
<Title>CD</Title>
<Subcolumn>
<d>1</d>
<d>2</d>
<d>5</d>
<d>15</d>
<d>8</d>
<d>11</d>
<d>13</d>
<d>14</d>
<d>8</d>
<d>7</d>
<d>5</d>
<d>5</d>
<d>5</d>
<d>2</d>
<d>0</d>
<d>0</d>
<d>0</d>
</Subcolumn>
</YColumn>
<YColumn Width="81" Decimals="0" Subcolumns="1">
<Title>HO</Title>
<Subcolumn>
<d>0</d>
<d>0</d>
<d>0</d>
<d>0</d>
<d>5</d>
<d>3</d>
<d>9</d>
<d>11</d>
<d>4</d>
<d>14</d>
<d>15</d>
<d>16</d>
<d>12</d>
<d>6</d>
<d>8</d>
<d>3</d>
<d>2</d>
</Subcolumn>
</YColumn>
</Table>
<Table ID="Table8" XFormat="numbers" YFormat="replicates" Replicates="1" TableType="XY" EVFormat="AsteriskAfterNumber">
<Title>S9.6 CD ClaI to center</Title>
<RowTitlesColumn Width="32">
<Subcolumn></Subcolumn>
</RowTitlesColumn>
<XColumn Width="81" Subcolumns="1" Decimals="0">
<Title></Title>
<Subcolumn>
<d>1</d>
<d>2</d>
<d>4</d>
<d>6</d>
<d>7</d>
<d>8</d>
<d>9</d>
<d>10</d>
<d>11</d>
<d>12</d>
<d>13</d>
<d>14</d>
<d>15</d>
<d>16</d>
<d>17</d>
<d>18</d>
<d>19</d>
<d>20</d>
<d>21</d>
<d>22</d>
<d>24</d>
<d>25</d>
<d>26</d>
<d>27</d>
<d>28</d>
<d>29</d>
<d>30</d>
<d>31</d>
<d>32</d>
<d>33</d>
<d>34</d>
<d>35</d>
<d>36</d>
<d>37</d>
<d>39</d>
<d>40</d>
<d>41</d>
<d>42</d>
<d>43</d>
<d>44</d>
<d>47</d>
<d>49</d>
<d>50</d>
<d>50</d>
<d>51</d>
<d>52</d>
<d>54</d>
<d>55</d>
<d>56</d>
</Subcolumn>
</XColumn>
<XAdvancedColumn Version="1" Width="81" Decimals="0" Subcolumns="1">
<Title></Title>
<Subcolumn>
<d>1</d>
<d>2</d>
<d>4</d>
<d>6</d>
<d>7</d>
<d>8</d>
<d>9</d>
<d>10</d>
<d>11</d>
<d>12</d>
<d>13</d>
<d>14</d>
<d>15</d>
<d>16</d>
<d>17</d>
<d>18</d>
<d>19</d>
<d>20</d>
<d>21</d>
<d>22</d>
<d>24</d>
<d>25</d>
<d>26</d>
<d>27</d>
<d>28</d>
<d>29</d>
<d>30</d>
<d>31</d>
<d>32</d>
<d>33</d>
<d>34</d>
<d>35</d>
<d>36</d>
<d>37</d>
<d>39</d>
<d>40</d>
<d>41</d>
<d>42</d>
<d>43</d>
<d>44</d>
<d>47</d>
<d>49</d>
<d>50</d>
<d>50</d>
<d>51</d>
<d>52</d>
<d>54</d>
<d>55</d>
<d>56</d>
</Subcolumn>
</XAdvancedColumn>
<YColumn Width="81" Decimals="0" Subcolumns="1">
<Title></Title>
<Subcolumn>
<d>2088</d>
<d>2742</d>
<d>2795</d>
<d>2381</d>
<d>2420</d>
<d>2807</d>
<d>2670</d>
<d>2794</d>
<d>2755</d>
<d>2487</d>
<d>2788</d>
<d>3189</d>
<d>2638</d>
<d>2516</d>
<d>2769</d>
<d>2418</d>
<d>2092</d>
<d>2497</d>
<d>2328</d>
<d>2884</d>
<d>3131</d>
<d>2542</d>
<d>2801</d>
<d>2775</d>
<d>2999</d>
<d>2691</d>
<d>2760</d>
<d>2701</d>
<d>2143</d>
<d>2382</d>
<d>2124</d>
<d>2378</d>
<d>2712</d>
<d>2698</d>
<d>2574</d>
<d>2229</d>
<d>2513</d>
<d>2808</d>
<d>2250</d>
<d>3043</d>
<d>2302</d>
<d>2613</d>
<d>2512</d>
<d>2848</d>
<d>2789</d>
<d>2201</d>
<d>2732</d>
<d>2462</d>
<d>2534</d>
</Subcolumn>
</YColumn>
</Table>
<Table ID="Table11" XFormat="numbers" YFormat="replicates" Replicates="1" TableType="XY" EVFormat="AsteriskAfterNumber">
<Title>Frequency distribution S9.6 ClaI-Center_with guassian curve</Title>
<RowTitlesColumn Width="39">
<Subcolumn></Subcolumn>
</RowTitlesColumn>
<XColumn Width="81" Subcolumns="1" Decimals="0">
<Title></Title>
<Subcolumn>
<d>2000</d>
<d>2100</d>
<d>2200</d>
<d>2300</d>
<d>2400</d>
<d>2500</d>
<d>2600</d>
<d>2700</d>
<d>2800</d>
<d>2900</d>
<d>3000</d>
<d>3100</d>
<d>3200</d>
</Subcolumn>
</XColumn>
<XAdvancedColumn Version="1" Width="81" Decimals="0" Subcolumns="1">
<Title></Title>
<Subcolumn>
<d>2000</d>
<d>2100</d>
<d>2200</d>
<d>2300</d>
<d>2400</d>
<d>2500</d>
<d>2600</d>
<d>2700</d>
<d>2800</d>
<d>2900</d>
<d>3000</d>
<d>3100</d>
<d>3200</d>
</Subcolumn>
</XAdvancedColumn>
<YColumn Width="81" Decimals="0" Subcolumns="1">
<Title>CD</Title>
<Subcolumn>
<d>0</d>
<d>4</d>
<d>2</d>
<d>3</d>
<d>5</d>
<d>8</d>
<d>3</d>
<d>7</d>
<d>12</d>
<d>1</d>
<d>2</d>
<d>1</d>
<d>1</d>
</Subcolumn>
</YColumn>
<YColumn Width="81" Decimals="0" Subcolumns="1">
<Title>HO</Title>
<Subcolumn></Subcolumn>
</YColumn>
</Table>
<Table ID="Table15" XFormat="numbers" YFormat="replicates" Replicates="1" TableType="XY" EVFormat="AsteriskAfterNumber">
<Title>Frequency distribution S9.6 ClaI-Center</Title>
<RowTitlesColumn Width="39">
<Subcolumn></Subcolumn>
</RowTitlesColumn>
<XColumn Width="81" Subcolumns="1" Decimals="0">
<Title></Title>
<Subcolumn>
<d>2000</d>
<d>2100</d>
<d>2200</d>
<d>2300</d>
<d>2400</d>
<d>2500</d>
<d>2600</d>
<d>2700</d>
<d>2800</d>
<d>2900</d>
<d>3000</d>
<d>3100</d>
<d>3200</d>
</Subcolumn>
</XColumn>
<XAdvancedColumn Version="1" Width="81" Decimals="0" Subcolumns="1">
<Title></Title>
<Subcolumn>
<d>2000</d>
<d>2100</d>
<d>2200</d>
<d>2300</d>
<d>2400</d>
<d>2500</d>
<d>2600</d>
<d>2700</d>
<d>2800</d>
<d>2900</d>
<d>3000</d>
<d>3100</d>
<d>3200</d>
</Subcolumn>
</XAdvancedColumn>
<YColumn Width="81" Decimals="0" Subcolumns="1">
<Title></Title>
<Subcolumn>
<d>0</d>
<d>4</d>
<d>2</d>
<d>3</d>
<d>5</d>
<d>8</d>
<d>3</d>
<d>7</d>
<d>12</d>
<d>1</d>
<d>2</d>
<d>1</d>
<d>1</d>
</Subcolumn>
</YColumn>
</Table>

<!--Analyses, graphs and layouts as compressed binary. Don&apos;t edit this part of the file.-->

<Template dt:dt="bin.base64" xmlns:dt="urn:schemas-microsoft-com:datatypes">eF7sXQd8FMX+n7tcwqUHREApLtXQQhIgCTVHFRQwQkCKIkdywGm4i8mFZouIDVSC
FSzPYEUUROUpVrAiPvShgO0pYHl/EUV5tofKg/98d3Zuy+3lNg1DmG8+m9mZ+c1v
flN/szO7v8sbNnLkWeOH9LGVJxBCKmwVNju9Cslk+2oyh4a8ZCc6SFGEOKhLHfKR
jRA7vfEQn56oCkwkE4xBMuzl+WcSMoLeRdNrtuL+QnNwIpawXI9R0CASowmTUysu
pEIY0sTTK1kJFxAQEBAQEDgxAJ0OfS4gICAgICBw4gLP5Ximx7N7E0OcgICAgICA
gICAgICAgIDA8QPO1gUEBAQEBARObHztwBn6UHo3PoqQMQ7VtY5jx46RCpuNNEnG
W3WEzI2qjCYkRudzJnOW0WwN4SDj2yghEXAvebZ12yfZ0uNAnN9ZSO+akFGyfxSp
uyVJM/qnR+tnB+YumFskzfOUlHr9vkEdMtLSO0geX4G/0OubPajDxPyRPXM65A6O
G9h++LnD8qfkjZCKi7ylASlv4tAxo4dJHXr26jWkuLjI06vX8PzhUt6Y0RPyJcqj
V68R4zpIHeYEAsX9e/WaP39+mhtUaQX+uSAs7ZVX4i/2lAQWjqHMetIEaYWBwg40
G8ZdJw4NLfQWBAbHxQ68xLNwMGWhMCsu8foCaXnu2Z6R/pK5bno7dpS/xLvI7wu4
i8Z7Sgf2Aj1NpiQ3Tx/wFlziCaQVlHjcAX8JTxM7sDRAo2dryC/2z2S0A3spcRFY
egOeuUNKStwLVaZueHGnChWGR+RiISUVumhwdubAXvJNeG6KRKUBd8Azssg9W8uD
xntme0oGpw/sxW9lAXsFq60XFzsYZpqJTuRzS7weKnCANmPjaQeTQmlrMENfg+YM
j39TTChwF9FqajzNYCgQ0sj9P6MBjoNJdJbzFjSy+cikUMFGaJCzERe40Q2FMAUL
tkYDGRKlZTPzWT7Fbqr3L/L6Zvkv4nVm1hZ5Y/PyhueBdpi/0DPOPdejVlWwfkyz
CtNqVputSqah7aZtOG3LRSyFRqIxnkDAU6ITomoxzNoqbGNpWkvTXNo2DEqaX+L2
lRbJ6m2CLIss+gld+RaKpBFv4gSpYTRGvtc/2x0q6glV+2HKoJHH5+5Z1ACq25iT
boIdUnhxWWnAU4jA8Z6C4HR1IrWFkY21Ahq4VlHLVUexVUHvPlpNxIP7ZmfpgjWN
BJ+Z8H95P6AdupF3BGMJDWx54/XMyDFr0zDB2dnmPaCfPriB9QBaFaPpWiVN1eTD
vXM9PuxONI4OYKWABq5V1HLVUXIzZ2XoHhB4cHY/fXDD7QchGq2xtH9IwTRCNlhV
rco/0ecOp8oaSQtVUUID2yrqueooNhZPSGVtXk9GXdYIu4KxiAa+vPnC6OUwwSe2
ui4uLjSd0RpF64crnEbQhvAUGyanIXmjJ7HjHbVVFDHT09My063uoQUWFmvaNaSB
DJWWb2ysoLBV5REqazhRq+KilTS8oHwlbpSUCzqwl3w2Njguppx9FtxEPtRkGFLi
dRepx3oRoTVpwvjgjNFWbT4VmqNJxocxHuUpmuehxXer0VVCK0+M64qgoZMr5bsf
2xNyu2zQBMgk3IfMQcV8YKH68Nm06uP8lsl3o44RcgfZ1UQNr7m0wtiKgICAgIDA
Xw2sCO4JmkR7i8yzCwMqAn8F7K5+8jrdTmJJJ+qOomt3/+wS91zJP0ua0C8tSxo2
XBpW5B4tBfxSgYc+XZWQOJJqeNUPa1OHnbn6mJMXvI76kxT6P5Yco3VsI38SVkub
SA+iGkXUIla5jBgQfJaAO1BOH0cYLVxwrQpO6XJK1a4aKeoag0iSXIK2rEAyKkkq
Yc9EKJk2BjByOEB4GQCk4KanjCYrUEe8nHjigcnMRHpBAjz9oE2aErxrSsgp9GpO
r1Pp1YJeLenVil6n0et0erWmF16RhXS5RCIsR/YkSiVwgBfLHUCYS+YxssRzaZnH
V7BQKvTiMXlmGc73NSx4sZE9f0hEnMpiuKe0oMRbHPDO80jY+6B8vAWlGhZBONUn
S/7Y52LMzYn5g6clYv78aYkYFWGZGO1lmRgNa5kYPcAyMbqKCXGcJJFQYj52OHG8
VAUxOp9lYvRSy8TozpaJ0e8tE2OAWCZG77dMjCFnmRhj0zIxBrFlYox2y8SYFiwT
Y/6wTIwRbpkYM5JlYkxdlokxx1kmxmRomRizpmViTK8mxCPJcDqjfBFrJ6PQiQUE
BBoF5OGtueeDH25N4LSYkuU4xSU7cyqp+3YmKXyM+XXhgBJu9Ocp/gNrlPBUxa09
eL3QOdFiiaxhl8x1VfCp47HgMwhilcAQaFvJWgo+gQPWUmhVgbUUQirAWgohFWAt
hZAKsJZCSAVYSyGkAqylEFIB1lIIqQBrKYRUgLUUQirAWorjLVU/5cwmisSSs6k7
zu8r8vqkWd4ADm3Md52Vs5wi9+iew+RTnIvmewNzpNll7tJSr9snFZSVzPOQ8Cc7
eBY5y13GiKdlXjjG4y4NSKWXlrlLPKXIeoLXV+CRFvrLpII5/lKP5C5dOHeuh+Zf
IA0bXSqlukulEk+Bn4b5Cj2FXXtIVNpCv6fUd2tAmuu+xCOVenyl+rwbKvQnO9jw
jqJ94Bgu2n7hT3bCQT3ZwWbxQPlEhG9IJxB1o9cMT8q58R1pTs13e82gngPBZyVF
XWOQvONol88bOTorLuIrZWsi6OG4tFScQgttSjOoZ0aoYTZuWPuYnRcB9X9mJGdH
mMy8nC45/xF0RIU7JXKYnRJBoHz3zCIPxj4di2VFAe35EIjkvphCJDBCYmTOckTp
h8kj30TGViQV/sgpgnCq8xif4VyMlzmxOCkKwsm6nGVi9E3LxOKkKAinOCnSwNkI
T4pI+33EeT0qTEBAoDFiv3ZGUL6PuMgsTgMEYw2hBaYQTCSYPrB2xz2D5h0s13IX
c+9nLnnMdfcq4LFcTqKDho7x+vEqqy5nES6c4RDP16UN1QKpMDlSBzyukqdHJZy7
RiCcl/l1khSHlUACsZE2TRaTj+19dO83qRKyEK2P1Sj3Rel8Dp0vWueL0fma6Hz8
ZI/5YnW+OJ0vPoxkoVILn/AJn/AJn/BV11eu811dBWXD1Y0JOl+izpek8yXrfCk6
X1Odr5nOd4rO11znO1Xna6HztdT5Wul8p+l8p+t8rXW+NjpfW52vnc53hs4n6Xyp
Ol8Hna+jztdJ5+us83XR+c6sIoeuOl83na+7ztdD5+up86XpfL10vnSdL0Pny9T5
eut8Z5Vjp5mvJPmjd1d6izDs0nKXpTp2bFT5I0R9eJdXmFt6//7jWTztoVzOLQQy
HU9ZBZ0MeRe+ctWq5yldmMU/IPPU3mtpF8r7MVFI/7dtV111jP2XKY69TdtdieNJ
URblLsjlWCntO8rtMZS2PJe5ev92eX9fDQUOGSjVsNEy9ZRBQ+YWF3kDZYWebp4F
xak909P6dktNndxzrMft69prwvCu0zO7JsaR0Sloo+qkyJM3B7UnOyQvBXtvIcFP
k0U0KH+OR5oizXMXlXlKpbllpQFppkeapRw5eWlY6qwSdwF2sEt7SMWeEnwy5J7t
oR5/iVTgL/MFSrtip1rhEJjjDkiz3EVFktcX8Eszvb5SqdAzy+vzFEozF9JojzRZ
ci/wlqaRp1OupPn/tTI8w/r/Myl4GJJvN8rPnugs/8DOVHDE/E/2cZxHNsqb8PwF
5n25yo1LcQUEBAQaHMazaW4CXSgQElQpBFqETBiOFaY2GNOiHAWlSKPz5bOIcHhK
PsUCuEZ8g66poGntUJbyrEraq7cp727fPoip221kACcE2I6YrI+3tQ8JcmOBIK8P
VI1/E/le+5Fl9RkICAgIHHfwFabRbwxnqP+zAgGBhoKq9wmqBsZAo1HvfJDWEicy
G7Sn9rop5Sai9JAG8u9y+a2XClJO+pIZZAUZTW4l51FfCskjHeiVE+bdYE7BgZfd
OI5HilEu7c4ee+tV7OyJnb2a7qqJnT0BAQGB4wmxsxeGgYCAgMBxB19hGv3GcAax
sydw8qDqfYKqIXb2QnEisxE7e/WVYpRrUjnW/RgvnWT3/CrX+ZOrjJ0S/OoaSHUp
d/selu/KacbTXWuIRNS3Cc0AWvOSGKHdlznR+E5yneVi9tnuLAd3J7mLrFJoZhE2
f4EXgC+ctF85Icf+5DjZZ4BQwMpy9tEtMt+lmV57EBRDK0piiCyJdSKMBybJ3UWl
fql0jn++vJs3YQR2/zzugjlSsbvETVl6StKk0bPkrGSOxWUBD0hpauVj+R48pbJp
ON9bVCT5/FKR3zfbU4INSLD3pSX2lD8GtgUbHyWPI1/TVl7per4cIc+7vpW3rI3d
406XanTvEYULA74YxnILsY+SK4iqqOCyIah9DK8TSMOKvk9YI+W3cY1xsEyQMaCK
AAG1IsjP/nUHadjGX0d9WXnVQ4oINhMRuNrmImBTog4hDdtyd0W7xKsvVUSwm4iA
0cZFwOf5dd4QGa+W9p/6weFcpSHiI4tQ5w3x8fTe7/d7/DzeEBZEqPOG+OSmgX98
3nc8bwgTEfgFEbqRemiIxFPtL1z4RBIfEd1CRXAoLhehzhsi9qlue8iuB3hDmIiA
TTitCHXeEH2Xtfv7K61n8oYwEQFf0HIRupN6aIgHhw/e+9NXnXlDdA8VAQsWrQh1
3hAvfL5i77+/eJg3hIkI0MpaEeq8IdaVj5v/wp9LeEOYiKAdlDh8Gu6ZXeKh6otZ
gPIU+udybjWCNIy5nXhDJEUWYbyi4wsVylpCGnbDf3d8mvnuZ8rsaLMgAv9xcKlu
ZJGGObu6d8a+vlsRwW5BhAll7LdT2HKHc6oxpGHdOy+ZbF8xQWmIKCsiLExbwNPX
AaRhL6We1vkKd4wigsOCCOPHThjB09cBpGEbYisfHeVzKCJEWxBhyOhhBTx9HUAa
1uH7fR937j5UESEmggi4p2tZ/FjpbE8h36yrFfigJEQZlMciizCubO5MuoylPdJL
F8OybanadEouQg8+OwZFMH/m4SJwP1/4AtZSaBfT1lKg+BzWUgipAGsphFSAtRRC
KsBaCiEVYC2FkAqwlkJIBVhLIaQCrKUQUgHWUgipAGspjrdU/VzOcsYhVj7NGe+e
j9/87CKNOldrL5qE2oaWYdfndLKD11E8SVeaJYGwd+lwod5XK9d54mrQVx5hW424
NwL7f5fghra2tFp7ggrrLoQs0I3i0DDc8Qujx1Vsl0fxLSRfoUAKDnYiq6Y4SlPw
3zY1G5IAH5M8TYLupJaXkeWNTwJ4LHoo6BHKwWIRChmNscnlA1VPsES4x54w7uWB
YGMjgcujRSwLSZE3lxl+ls/RIAxcHKYDy4mLqEYcjay4cEYgW5zScVQolLfK0yTw
rO4oNtnFisR5mRUJYUjNm8CYb9giIWu48pctJFKRjH4OZGtWJC46n9/DiY7ihhcd
qYcNr5XwvC2MzIFIwivzZi2EH3XuXyD8jYrg6lGvU9Gs+J2GjiTc7wELJVttCCXb
WK5ISlb+fIC2NpSsdmBcSq/XaIhZGAcfwtyuvl7JoqdAyXKq46lkuSI0V7L4Ps8Y
y2ZGrYzgip4eTsmi1FqE1UjhlSyyAxtt8fncaER1lCz48smei2lWJIRplazlIoWf
6s2KxFvPiPBTPRMdRQbCia7VU6Gi10DJGoWvmZ5iwqOTATUXvppKtm6ED69kHVSs
bGJFyVr85SMZdqF4tRCKt7Fcx0Px8h+H0SteHM3/VYoX0xLozRVvU5NYNlvyr7sR
C66YfMIpXpRai7BaKrziRXZgoy0+ny+NqI7ilfkqCoCLaVYkhGkVr+UihZ/+zYrE
W8+I8NM/E51zDye6VneFil4DxWsUvma6iwmPTgbUXPhqKt66ET684nVSsfBrO+wH
BofLmhZvZsM2g3iitQihWBvLlUf0ipWrHrhoy77w0NaGYtWOgPn0epswc/Hwp8th
6TQsg5MEhy00BuigWOFnihW/tyUpMcDxVKxtCaMPVZ2QCkAs0mF+C6c6uSbkCKtn
wqtO/ruL2gLyGc+I6qhO8OVTOM/VrEgI06pOy0UKP4GbFYm3jxHhJ3AmOtoJCCe6
Vvs0GNHD655Y+gdzEaPoo55/dombvXlrqoj6mz8YKvrJ+EmV0E8qUA2R9dMDymWc
D8XVsC6jftLC+OCnHQHQT9s0Axftfyb9vyC4laQObf7jwnr9lEmva5UYUHP9BD9Q
Hf3E01Shn67S6qczCOOZp+gnULAZEVIBiGVTCvvgEhRyV7ep+gnl0iLsjBhePyE7
7VexAJvnQsE3GDmq0k/gyyd5LqaxSPipT4Rp9VNokbBJN9Trk5QTqdDCGaf73fLP
r+IxQ5MszmYLX2jQ8r5iRHg1wAqHlgSMhcNPkyJMq8FCCwfqjsqXnpaKhju0QzCR
s6qC8Y5SvYKF129x1dBvwz2lBSXe4oB3nkcqDbgDNIm3oFTot4hANZjrN36h4tra
2BUgoXOquBrOVR39pgW2JO8xDFxjGB/aUjCE+Zl+Q+i7mhg+fXNdxfUbYDZBALJe
UlzAqn5rTxhPhAIyH3m+lBQKxLIphc2XUE1yV7ep0xan5VNgUL+9FQxGwN9k347R
uH8Gd2S/fP8wvTbZPh4tRytAOB55peh0mQZZ77dXyPdp9DoUIwXD345i4aDf4EwP
4SPRa0YsCdIfcjD6xfQqj94QQl9Br/SYLTIN7g/R+5/JDpteP8OVlBQc2nlaIjWL
M8JqOokc3zgjrKaTSM3ijLCaTiLh45qSP+j/3+iV7w+4iyRfGf/oTdHaLWw2vP/K
wjwLCorKCj2FPPI0beRMrw/mYZWoljbbWK/PO7dsLmlis2X27SzlMauz3iIPSaKR
nkKv20dibLbs0Dj3Ap5Q/kTZYbNNCBSmScM987zyd3ggkkNGlJT45cxlumY22xj/
fCpNP8py2GiEz0V4c5ttYnGxafjuk7z86opMImzyQ09BfQBsnRWK8Ps/wwlfA55O
/9qSbGUbazxdIFxIl7t+Oo0upO4yebVMyJ1UtfyN+jfItqYJnS9bkT30epY8RNSz
doAvU+FiMwY54tga/CHKeMKOyaPpdSHBLyqycvkJm7qhtBYq4VBnyxR6xN2phMGP
ORo0KOMGgl9YZMtuzORQGlAye5R7tAJfXrcnDJBRqy4gH/zgH15dIOfh7oBbmuAJ
9BwSojggECFbRuEepFtIpXyP8Bm2LaPkaAU8gxQbm/BxX6G5T7GzeyiRCjtTIghP
jyIhigCfwn9sWynTYP1WbK8M3qdEVYbQI3xDlEqT56gUikPGXymnEVbTSSR8XFN5
zwqDpU8/YrfZ0ulgsLHbzPScHMxZmX3S02U3qzfzZ+fkpPXFlNc7I6efHNK3X05a
elZGZmafPjn9ckgyiLPSstP7ZtPQjN59+mTQbmzrnZOWkZ6ek9E3o2+/9Kzeclhm
38yMtD59+/RJz8jsnZ2RI4dlZfdJy8rKSe+Tnd0nk6XdLQ/iJxq8nJrBr9sBkIg6
LaO2MRXVZlqOoX/RdA5hD/BN6bR0Gr3a06srnbJ6K9siA8gpZBxpTmbKNpcImUfd
pfQKnZbBB7LAxdSLHDFDwQ9RmhI29SEO2yi4R1x75R7TclfCpkv4eysu/HiAP4Uw
fuMIfgiXlXGmco+6mKfcY1peqtyjNqvaHIinEy6mbPONbWWbQLz2VAcw3x3Q7n6v
Vi7j06i4GtaVR6zvDmhHQDG9XtXMVmh/if6/1GT3uyNRntB1rz11IGw/gXPlu988
VXV2v3maKnYHirW7A50Iozd/7amzSSxbDEJmALHgihks3NktSq1FDfbGkR3YaItf
fSXBA9W9cfDl61suplmREIbUvAksFwlZ80UwUHWReOsZEX6DmImOVgTCia7d+Q4V
HdVezdeejMLztqiJ8OhkQM2Fr+ZrT3UjfHjtm0DFwmgb5/cVeX2waokH0lro4v75
7plFHklRyWLDPjxQDeYqWbthn21j1ywSqgbE1XCu6qhkLaBMbzYMZ2MYH/AI50B3
YSoZod9oYo7nhj1KBZ7aDXtVJeNRwhjL5lFeEsSil0Nm9HDwkweCTVXJnBZccQX1
VxfZZZmVE69MVD4a94txR9hOCdi2srEt9mH0yovKC27PSw5s55eTyfR+h2NGkP5j
ZWsf9DtiVPrKJowe1Z3qOBykl6JV+hnxKn16AqOHPMUxTB4cLzibfBxMu68JS3sj
aJybVDmbgU85cYP/KcVBninNjUcK5fL22Yw4ttODvEj8BvkeT9ob4veN/plssOuX
LLwBkZrDuEtRdZyKuosrD96HxqmoiziJHN/8gOOfn4rQuPLgfWicCmOcFsa4mvIM
F9eU3EmjbrUZfucvwWYb6ikN9MRaRdnfT7bZJEA145qkhMhb8bGKZ8Jw7OKre/XY
3LGeTtmvTy0u8c/y0iVOkfcST5F3jt9f2JW0rg6js2gSn6eUGTn1BoLSm9g+balE
qXZAOV+Dfc5TeDBsZtLshvl9dOHm9voCpSRel7t6RlLsl6NTlOiOCJvMq7RZMDT4
S4Zun7to4SIqQyvs5Im2UaIaXNuoTw/8Sd1GWFsB/AnCiPCPooWE64sU+ncKfR5p
RjVRIhlKl61jSRKZRv1zqX8R9V9LziAPUf+z1P869b9H6b8grckRGpZka0k62xJJ
pi2ZDLGxI6cxtuZkhq0FmWdrQ9O0oYLhIwwOaCvIChd7j5AIT0M4aYE2gz7EzgXE
HkrUI6exhO1Hog6mKfRYduEEBfRYkOGHOkGPpRHe58MbWXiCekihR9yzCj3q5nUl
DP73CJMHeXxBlNeq6XVESQt5k5SyNKVXZxtLh7hMG6NF+iE2xhP288fY2H4pjrhm
2JiL9PNsTGOjT/HHUHkxSVjdaJdPEgk93gpdPiGF/AytLqDCQWWQIi8oJCK/gyDf
IzzFlhJy7ITwShujx326Xb3fYg+lh+BrlAUaFmI5diziWPgmuhAz0qMSpUR2/KZ9
9wL8K5qoeUnO0LxAv8Ep6cK14PwrmzH+8pHeKVtGhV9AaWFUbFoY48Cdo67itDDG
VZWupnFaGOOqSlfTOC2McVWlq484LYxxNU2nhTGuKp7h4prKDxur6ZWdlp6TSaJx
2pXZRz5Ey0lPy0BARlrfvvJNdnpaVo58k5mW0wc3vdNyevfBq5kZ6Wn9+kK7ZfbJ
SEcATZ0BXZ/Rp09aPwRkZVM+oMhIl8/10vr0TU+X36fIScvMljNOy+4ns58wXBos
yXEZvUHL/u8mjxPYfz4BRKVTpz2ckkVdI6zmSrYgGIfXfJ20Ddmz++kE1ndiSQ/F
35fOTWfR2eh85XUEL82Xvc8RSx8BGc2y4PY8IXfQ+Hvo9Sx5m7BZTH7OJkwBYmaD
C8UB8aC04EdZ8I4H7qFAoXw5XQ/lHnlAEXOleRZh/FHW85VwKEovYfyg/Ph7IKDD
eyDggzzx8Ip7KEc81IIGivAOJS0U4j3KPcAVYlfFjzrXKkTs14ZTiBxV7MtqJ3xg
tywQqCh52E4A1KwT8EB10x98q9q/TaTiY+up7vZvh2lOVMX2bXigGsy3bzEIxInq
iXVF2r79Bo1JW9u4fQucZzLKtWG4w9WFsNGzJaA9UTWOJz5lIxzg27foVaH5qEZS
uQtY3b7tRhhPl/JbCqBQt2+789iQ7VuUBEAsKgbPNphuhxAmDy4uL6flULdvCQhC
JknX/S5+u7h3xpZ2OT/n/ix/RgxKTMZa3WVWIRy7g5OlOk2jCCxfFaAy44MCmE3T
XOeg8gBjJXRQwvCQxs8CQysh+BAGsVj25meBqs4xLjyMheGczAoT/myQFQZtDRgL
w/lHLoypAg1fGKMCrZvCmCnKV2VFmSQU5V8EVIO5okQ7CkV5Yl3VUZTaEYB0q4lq
GEIbxsHHO54sQOcqNVOUcIFwipJPU0ZwBQkBeRqrirInYTzNFSV2leTYEEWJkgCI
Rb54DsK0OlQJg0xcXk7LoXtPhxUo3KRqrujAUFsRvHqNCD+dskKg8ICxEJ2UMK1u
CC1EHSk6bWFqphtYYdBWgLEweNCyVpg6UHS1L0yoontVeSJMpmKiEBZVm6LAQiAU
mA5CgTWWK5ICk89WaGsbFVgxwWdH6lBB+0vE/N3ZdKIoEZ3liF5E3ScCNVdgPFUk
BQbwtDxNFQqsWKvAMgijD307FlIBiEU6bM+FezsW5dIi7KukGBBw+caZOv0hO7DR
FpBNaqGozkYZ+PI5notpViSEabWu5SIZZ/iqi8Tbx4jwMzoTHe0EhBMdxW1woocq
I6ermayMYM42olW98VHslyABlBMqGa7C66QGqoHrnlPkpnokelbs+oQWSQ6ljhaQ
THoBNnnAtKKNUaj4gb/Jm+poet6n1Lrlg8cMSpzrfpcxDV9IA4U098xgGkK2uJQb
TesxTs1ll/fhFor1FG7JC6gMvv4HKm0MwHPkWBHkh+vUoA/dtCXBWGI4lMvcMa5g
kIxxGr9T3tQ7TU7fiXQmXbQc8ipdsntgDXP5BtXkxzX+DXL/PV3mcCYtR1edDBxT
XOH9jENrmUM30p0uPh+WvxTD+wyRgKQpEwYcPHpVaD0h3jonLWrOyZjSCNCsK+da
hcP8R5+qwhoiEXUzMBys8eXaGIjMF9TrXPoywLWWl7bUkfOyzpe9U8MQmS+ojWUA
vbW8tJwj52WdL6ThiMwX1Noy8HJYy0uLyHkB1vjWri/xy1peDbMv4bLe5g2zL3Fa
a3lpETkvwBrf2vUl0Fpv84bZl0Brvc0bUl/qXH4dUb944xjnaipjdS58bO2hPd9L
lzekGPq4grcK2JaoNSB3jvlyCYFrg19EmiKXx16n5HS94t6guOvk0yKsAfhmWhik
D2EEnZWK4F/PceiXQ84mU2VXrYhMTUV0cgVvFfCK0HbacKhRRQRjLVQEeo4ZGANj
RXRhwUGctBWhvItjXFKTX+ShwZbEYYaG6yoXc5W01NX/nkPVqFFF1N/QkHedNND3
iA2O6vUIXhFWqqNGFVF/PYK/ycVx0lZENxYcxBTXRBl/DzM0qq6Iep8jqjM0jBXA
wRgYKwLJtKhdj6j3iqi/HoFVihYnYUW0kheFEAAb5UAH+aMJZZEsnwmzAlUM6Si/
uapdPmu31iuGtA/uh2p/oUQqhyXcOLLA8ZlzbeKBpHsdJPa6xLeS2LZb6yRCDpEl
SgH+Re4mbDuLywoX/I3XIZm+vqGvNZj1Ybu+2vDmZIHptwsc5othXg4zSC5WZ7Gk
MnpA3NSE/klvRF8Ul5XQIumJ6LPixiWkJUFvV7/OjNvb9QNt3QCp5RWE9ZO2hL2d
piz0qUhfBqkMm4qaLUIn7UwslQbBdLgHbztthQWkkDJFz7ATV3Anlhl3NqJrcNDd
SzJs7E3xGE28thSgNLQVWKKPK4KBTCsSXTohUYjYGvDs+fkEB8+YDzPkxK9wAC++
W6lAKxG/D15KuRT/Fhe7yl0YxCyJa4h6IZwo8Rx2kupKl/OtiHncliHftSMjazQU
tFVtBB8KTrLW8VMipo/3HC2S2PTRIolNHyfOUDBOoJBEO4F2k8vRSZmCteDdryb1
y8tsBrV+MT3/M7q/PD0/TusW0zNce6Or3zP/gvq1kwdiOjifju8U+1bMSOct8SR2
T8x057z4/bQy021K/aZWo35tIQ849QBj/bJxDoSvQa2K5HHNSS+5hIuPsTnjFhp3
qVzOPgpF93J81NKK4PGiBZ2OeMoe8scq5oedPYlEkC+TySaff8WSDVmobdbyOFxN
UyR1UOUQQy4h7JtVH726u2rS2kjJ+IdCbe0iZ2XSt7EVyRXON5LejC1KXuP8LGld
bH6y2tqOarW24wRs7bcIa+0XCH4KMrS1cTpog9LdogTT+oYKnpzvDRR5jK2LZWos
2ZfWEFp3R5QtfovjyoRfojrH3+uYmpDgGBS/xDE0oeatuyOKkCtperj4kHuLQ3UR
/gsNn6q4nWk4naWDLsITqIv84Q6i4Us0LsLDte6SqJq27r6jrHW/P2o+lnFya9a6
Uxp86x5K/HfcvqSVCc2TYuNfSgok9EhqH/9Q0gVUxMyo6rduZpQjdR+dmv5NFRHc
lZTPoUTVRfhLNDw2nrkBGt5c4yL8Ieq2V1zI0UPjIjxc694UV9PWfSDC2MWpug1v
fW1Rgml9Y9t9SobSvF0IMmLH2qHNGyOL9tc1chJZHP1T4jt0uYNlJK5boo8mvhKN
Jyu7vfrLHTtLUM8wNjJrIuA+kkPY8wsMJ+if0EMRfDQijOd9EtpHKcIQpK5JvVcF
ydXKVV6OHG6wXS33im5Di9wF98pM8GSzmEgxoQXUIly4FiDhdJWVD5Hy8nKya9cu
MmPGDNkPd//+/fL9iUTTGBGurFbqo6HRCAgI1D++L3cQpqgOEleUupLB2iSichAQ
ENDhIElxqItYgI+icJrOijYUNIJG0Jy4NKpuhablujUctRWOgkbQnGw06iiijhhF
gkbQ1IBGHUUOIp7zBARqAnUUYetdjCIBgepDHUU4aBOjSECg+lBHEd4XEKNIQKD6
+N5V7rom+PqHaibmweD7rmxH/yHZYBAdcCHvjzO/a4hKgddCtO+xsNdEtrjGO1Np
8NR57qJW1J3WjJAF0w/e9fm404c033rWebdl9V35waf538W3+nFs1p5yZ8bQsx+6
8delPdLffnve9dvHdfvl10Vf3Of/sveO0pX3Hdw0wD5zcbO7lmz/5ti9q/b26/3i
tP8dXPTdkopnli9pfllgU+yvO6f2y50xpGOvJQN6vLak25HsGdI97TudsSE3r+Kl
969afnBy7umDOr0zZ1zrdTu7b10RkKZ99tXQe6Zf/UXfzKM3r93lbzlg+9af7rh7
6aoxtorn4qQe7+/KGrO27V1n3/x08Z8XbvX+tv7Is7s/ndOnw9Rr450Tn7jQPXjs
357v+MDb62euuuDjO59/bvjmp7acu/+dr35avM13c++Lpr43v/Mv187bvr/dwA+O
tf/+rOsvTX3kxx43fXTu0r33fLSx820+f/Ydq+ZftzBh59GlcTvbpbXteuqmORPO
u2vYcvsXl76+dOX+8qsPP97irpXfXPtBUv66ob2z9vZ47ZXunU89mn9w/YjWCVf1
ff7zdWUvr0xaveuaA4WrO28rXTViZ+9rS3cs2xj/aJPX/rvj8MIbmzx0Xtmfi7qU
HGk9y72x471f50Sf3/ywK+O+iwe90Pb2eZlHClt0nbjszw1N++2cNzj39vHtDz94
tMP7h5ce7nV31/cuandxl2s/vv3NGWv3d1u5defGjJXPFF73yrIeWwv/c9dNXS9Y
W3DrB9MWLfrnwi2rxk1Y1PXl26ef7R+8aH78o7Pj7j/7xxH3ny59tvitfpt/f/Wh
s7r3GPVSZdINDzz/YNv922wbAtNevm73NavOzep8ZeK/7nj/0y/9E5/6LXdN8cyo
qR5fYTPFUFE07WGdqDvKWxrwzy5xsx/wMX2RlwirRRFQjmpAHQF6q0XRyktpbpJJ
wxPkV+3wFmgbAqtFeEsPY5s4Qq0WLXEyFxS8ntNHDP4uZsJkFwsHrZxaBsK04Wgq
Hla11SItpx/Kh9vYbg5C0FPM7Soq6U8S8PPXUdp380yAuuP4kQy0sZkb4BHcRc0O
9fokxSjlSQvUUTgcwncUmh4uUBV4Tar9jo1rBm2/U391Tfl9tZMQ2n7H5sgfr+Ku
2u+q6JwCCkL73XF52/oEhbX5TtRgZPCajJbwgYJareraxiHlk/qpyx9cqnVHPKlx
645nEHXNpbfuqI0xg2rdEVCtO+LzETPLity+Af8wO1XjZxaW8Dk3bJmnkV6m9iF5
Co40jZ9Z22gnc0gnGXTtaCZDZOuOZ8gcepM+pC+pO0uKDZGTsO7IEDkv63zlT6cU
ROYLamMZQG8tLy3nyHlZ5wtpOCLzBbXRqiBgLS8tIucFWONbu77EL2t5Ncy+hMt6
mzfMvsRpreWlReS8AGt8a9eXQGu9zRtmXwKt9TZvSH2JWWXiv46iriPObb1/49Xj
Lsstt/O1RxgTdsE0qqu17qiVyQzInYNZZYIsZ8q9JJ24CT4d5f7XZD8kYP58G/zI
i/n/T/Zjrc38C+zwgyfzx0XBj5UB898r+3GyzPxpDvhRWObfIvuxamP+8dHwY23I
/F/Lftwx/7wY+FFLEaxKRbIz5qiBVSnWkMynQl2+sYY8nua10JARKiIYW+cVwX8R
guOkrQijWZg0192rgBvl4Rpqgk87tJu7grcKTmDrlEarT7WzPHcCG2XUHhoAJ21F
9GbBQZy01im5oQmO2vWIeq+I+usR+AlwLU7CimDWKZGkvq1T7nF85vw5YVqyPZrE
/jMhO1lYpwzXUVTrlM9EZ8ZVJvRP+ih6UtzlCS2SNkcPjrv9hLROGU+wtcpLLEtO
Pf8MUhmhPpok0d7JB4g5YmnvstOHhXT5R4S2x2AD3qWJVX5kSgcz65RaqXkpAEZZ
1RYjkslVrgKJWAPpAYZgpWWHMN5IPFP+q2rhLFMa6TmUaFkiw33wUsgU/xYXCVqh
hAsLldwyJYBw5vI8UTJunfKRmDzFFpKbuGw1GQoGyXVQrSf2jf4pEdPHlOgWSWz6
aKzWKXsqU7AWjKJmZoPUVguFWr+YnmGdEtNz47ZOmf4X1K+d3BDTwbk9vlPsEzEj
nWviSewbMdOdFcI6pULBbJ61IebWKc3fXzJauMP5XUOxTvlHk2bJ0+LsKe2cWcnZ
cXuSs5zjks+Ie0tjnbLxt3amjbV2F5u5hTucbtowPrfwlD3k0aq+U2VsYSxVG4oN
wyzHwdgu0bcmTnU0jbNH+xJLHF3jDjgmJda8hbOoILfS9HAPUpXfJVp1ET6VhvsU
tymtKDpTB12El9Bw5A+3Kw0/oHERHq6Fl0TVtIVHKuN5/DHz8YzdWxvSb+Epe8jc
jG8vNeR2FrYqI9uqxML+BLZVmUCKEofG9kjJjKtInBXrTEmKuyHpythDyb/RwSc5
WCM7q7H4kRygqm+YNzJQs0aOVxr5DMKbVZKblZalnNP2kMvfMThssdzirx1r25W3
JdsPiFLa8ZxatKPKNRTC9mWtaBojwpXVSn00NBoBAYH6h7B9KSBQdxC2LwWNoBE0
ehph+1LQCJra0gjbl4JG0NSWRti+FBCoLYTtSwGB2kLYvhQQqC2E7UsBgdri+Nq+
PGhjti8/p+5zTWXbl3d+Pu619FbXLVtz48jFb21u9evbvb96ftuX22YMHTO50xeu
QR2uOXXl9jtuf6s8++trFwya/vr3Zz035dmfThnb4saO7f93xd4nr3jl2RmvTP0h
Zuj+K5LbP7h8a/T0zY+f/+uK3kUHbp9acM256b/Pvy25+c/Ob4d9c3PLUXf9kbu6
7XdNdl7Sacx/h+2M+eHi01/v+GGXtNWry25JfvLBbVuzn5rduu3Wa35aPvXNHr3J
/s1259kb+n9524F/n/3wlIc/rHzUu+7Kj565w/fKjw/mRcc782+5sHTgvS+VZo+q
uPCazOc3XLjQf+OV3qubpLzT+ftX3S/3v3TgI5v2/l1qcfjtT16++/3Np/wybEtO
837zVizP9t3854e9fc8Ufrxs8YZPbv2+/di7+q14pHRy/7xuTS8u+HRGQcvS1267
rllG3ClvvXnm6k1fbvJJBw+tHZ/6zf+Nad9m8k3uAz13/a3bxtf/c86yNa93+yh+
a/uKF17qf9GanK///H3jt9teO2PHso2P7fzqtbl7Fly+OP6DPuuG5JySc6Xj0fRP
m475YOOtI84p7LQyLbB8epPV9yXnLly6ZO3Yga80fXbXvKRHH145PrP39E53D2y6
94GHf7p84LpVd82c0uKark93n3FnS29B+l39Tvti2kObunybm/l08cPrR4/0//vb
//1fk3FJd7//j/2eXzIXnfby7fvfPPrq5bYkf8+A1oBlDO0mMElj/nqvYsqyyD26
J3sb9KL53sAcaXaZu7TU6/ZJBWUl8zxEGLaMgHJUA+oI0Bu2jFHqaAHJpBcD3uHq
QmDYEmDJQg1bqnVb1ZtuapwxDZqKh1Vt2JKBcWouS8feVSMEb7S2kN8sjJLNoHJ+
3TT3+ByO31eSOUpqTEfaFGbQcjGDlrMZVsj1hZy0ODUYipKgBOipGsNMrvtd7OYx
xVXgejLoT1AMNJwpt0YuySH9TE07pbr0/jSNn33smipzcJH+ZIAph/DGoRIUDu1l
DgPJIDKYqIaYULaqgAec4rYDDh69KrQOEW/NpJMRVXOqSiZjSiNAI4xDMUTOyzpf
+V1lBZH5gtpYBtBby0vLOXJe1vlq+1VkvqA2GiUCrOWlReS8AGt8a9eX+GUtr4bZ
l3BZb/OG2Zc4rbW8tIicF2CNb+36Emitt3nD7Eugtd7mDakvMaMIufoouvIoabP1
0jZbbS54qzQO5Vru4rccWuNQkVAjowguHmvBKIJCGQZG6xA5+mjDcuj42hQCIlRE
MNZCRaDnmIExMFZEPxYcxElbES4WHMRJa1ypvz66loZTTmCbQgNYcBAnbUUYnx5P
WuNKg1hwELXrEfVeEfXXIwaz4CBOwopgxpViiLqkrC/jSmsdnznXJh5Ies9BYq9L
fEu23iGMK5lBNa60OPqnxHei+yfBkgyuW6KPJr4SfSIaV8ImYncqBZNZ/h+u+Aas
Iag9Toz34rQugD7ooK2wQP6tI/QMO3EFd3ZhXCkU4Ywr8Xy0pQBl1cKCLFhgBiTi
WZgBQ84MPGM+zMIZV+Lg9Bw8mFaQ8T54gUwN2+JiV7mLGVYCzI0rMRdQjStVRg8P
GmnoVaOhYJBcB3Uo/OHcED8vvmVSu9hd8ePjf06MiX0p/uL4+BNwKGBPvVvIULjh
SEdGpNlf/23ykS6L//tl7i0rJn3SLr+N6waiDoWjutdFOdBTogxDYUgdDIVOyn2N
h4LxmEELPhT2G4h49XGhIw0FALz4xj3D0WO0goJDQbnXDQU1TDsUePc/3kOBV7UR
6lCIic2Muzi+f1K32ElxI+NbJDWLHRw3Pf5E1ApYe3QKGQqXH1GIwh010Rp30iVG
SJ/S9Luj8gRqNw6FYLx5PzIbCspukgxtKcIMBax8mGBHwwwFFJMz0jIE+FCQbeFo
wOmsagUgdCjoBqduGOBiYnCptUMhnFZwKfEc2qHATe4tiaqZyTJjzWjBh4KTLip/
SmSLyhZJbFHZWE3u5SoLcy1496tJ/fIym0E1LXR9dGXSewnRKY9Hv5G0NuGL5Nej
P0u6NWGb1kiYVI36tRFJzqBeYazf2lqdeSuCaSGcctvof1KuBNP6pj4y3FsacPsK
PNKsEv9cw6+dwrDUzLKZM4s8iTW3LLW/FsZqkDKS0aGTyeKiq4rOUZP65WU2gzq8
sh0D48+MHpowzTEjPiq6XUKpY0H8d46YBM3wqoblLlhoy6aCDKXp4Q6kj/RnRqsu
wqfR8HaKO4OGR0WrLsJLaTjyh7uAhn+ncREeWr/1baENr4DIK4QtPGUPOd2w4TUf
OfVtrstOlto7OP+R3Cl2vX2k89FkEvuWfbpzebKwpcnAWraL3LIDdC2L3epavGxn
7BLYdrBmcLO+J1Nhpg8ljGSmD29rncBm+pKq2LGz26uvMe0sQT3D2MisiYD75BNm
NEAHUvULakBwn4EwnvdJSKEUYQjua1LvVUGY1asVTWNEuLJaqY+GRiMgIFD/EGb1
BATqDsKsnqARNIJGTyPM6gkaQVNbGmFWT9AImtrSCLN6AgK1hTCrJyBQWwizegIC
tYUwqycgUFscX7N6l9iZWb1p1P22lWxWb+W7vp2ulK2PNs85tHrSxf/I7lW+qeOU
C269Ln/UzTc4mxUvvbfwX2kZe+a83C320YEk+f0o/2v3DUh+tXvKrGde/GHXnk5j
m3ZZsz7/kxf37N1+OPfPi6Z421z/fl9y+NLkyg9nP/ivBceefv7803566MIVmW12
Fw+JOvbkV9fcXFZ+9mu5X0V3Kzz6aLvZ/1e2Y/aMxb7nK3vOa+VYmjjx/OFDX9hx
yeHD3cYc65LY4r8XNxn44UenJt4ROyWO3DWRXLZ79Q/7Hvg/38t79tz2xb5UZ///
vb7pm5uzVo3Zct4L5Jz/7Bm8fMqe0n++mnrZiIt+vnbuB/P/8e5t9ufK1o5a89wF
bftGL79j696LitY/sfn+Txe2vf+9vU//3N896fZrv2sx6My/+/dd/t2IgxO/ifpu
7eWfDPhXzObR7+yce+XTsz490uqJdya2v2zMs7tSZ368+tst/+pQnHjW4Veu+W7g
0h6Lyp+bXvHbbyuatFlydsZpvQrPWPRx4S9PdTziffnXAwcL33f6v7mm3W1F61qu
axfdq3L6Oy3Wt1ucXXzoh5ezJr/YNOmzs9d9lf1i/M7sD5Ytrjz9nbWtTh/bcuS5
57Z8/b2WuZuXJew+NeOVG/p/9N33945YdfvMWa80v7tdxqM7tg9evvWr25+/7M5V
H81c6nmjz+d9Z/7wx+Sps0Zu//n7hPkt7sjqOtd+6PFW99x77+Uv3zA2ddKnD20c
PXjRkKx+Yw+fP3foqs5FQ5/a/dTo/9z/RPMjTxY93ezA/7Y1yR27qN/uB/c9feCO
y5787LJn1nbd3X33PbZFu/6cvmlR8wsmvXzVoh/ab7rxmo++3Nl6fYdn/3nbZ00O
pNx0d/IF9udyhvR83bf54Luu/962fNfmd//YtvHZ78+fOOtI64e/njBDa9SvCe2k
eJ3S4nuGRBjwi4ByVAPqCNAb8Gui1JHRgF9X0lAN+MGFDPiQp4X8AqmNZIBUQaXc
d9CPQKWNMcOKID/gVB33mhnV6ymnn0DOIWNMTeKluvT+NI2fGTlIkznkk3HkXFMO
kY3q9ZA55JHzyHhizYAdAPHTJwijeuawxlf79X1kvqA2GqSDay0vbakj52Wdr/xm
sYLIfEFtLAPoreWl5Rw5L+t8tf0qMl9QG425Adby0iJyXoA1vrXrS/yyllfD7Eu4
rLd5w+xLnNZaXlpEzguwxrd2fQm01tu8YfYl0Fpv84bUl5gxnAn6qJPXqN45+uiT
15bcGBYcxElbEfksOIiT1qjeOH10LQ1mncC25M5lwUGctBWRx4KDOGmN6p3HgoOo
XY+o94qovx4xngUHcRJWBDOqhxUT3x0XRvVU6Gvt+BvVazzmk9AhMsjxM5/kCu62
Gk99GMzMJxk/CualAKVJW1kznxQO3FZTXZhP0u5WKtBKxO+DFytXYzGflFGDoYC9
8PqHsWTGCRSSaCdQZt9lgjIFa8G7X03ql5fZDKrJhyJnZdK3sRXJFc43kt6MLUpe
4/wsaV1sPu3kGbbqm3zIsDlw9FDPMNZvba2ARDKfhPMMG1592qIE0/qmPjJZsfgg
EeTDZAi1+PDX2XqoyjpSYxs9+VW0fU3ql5fZDOroyXLY4rtEX5kw1dE53h49NaHE
MSj+gANWjGo6erKoIFfS9HBtdAnaJVp1ET6Vhk9V3M40nLZs0EV4iYNZUYI7iIYf
0LgID63f+raOhLM8s9EzpYGPHjvZ6ujgvCWxU+x3jpHOixNJbFT0dOf4RFhI4q1b
HQtJGY3SQlJXuXXP1LUuTMtZfHPB2PxUrwtrSCeQNSQcswtrSMGrYVhDgqS9iO5p
3BTGBx+9NSSkrkm9VwVhDalWNI0R4cpqpT4aGo2AgED9Q1hDEhCoOwhrSIJG0Aga
PY2whiRoBE1taYQ1JEEjaGpLI6whCQjUFsIakoBAbSGsIQkI1BbCGpKAQG1xfK0h
ZdqZNaQO1J3WTLaGdNfnvk/Tm29994WxF090TH1x0sFnW66cl9v108QzoiZGn3rz
6IPr80hUuyk3tbnkmlf2pM37KPvb3jtKi+99/sbfP+301vCKitwv9/bbeqy0qPOv
P67/700pJb8vrvipYtzTOzbPyY8vaLExbuim2zJ7rHn9WL+Bbx9sOt75cc8+D83Y
vvernKzlI/ee4vllVOu5H7zy1aj+d7b94dLVY2fv+8+EzD/Hfrfrxzsv27513jlj
3xzziL3iwlOlovd3xfa4+PZud0yauOnBq7/aeP0Vmy/5e9Z94258JL28Yubnp//s
/Wn7FdLZn5z5cZeof9xz2TnbW9vaPdh9+T8u6dIk8b3Lvf32/n1Hy08znvnT994R
d87ypK8eWPlK6aGXfn/q8t1Hzx6Q+e1v509a9Un29oK798zKv3vPjP1rxq9Ylnbq
2H7/SU0d2Hpy5y793eR+76bXBvYaftmOvy+e5Zs+bcuK7p1PPTr+tzuuTeyy99PP
fvjw9F53Drth0Y4LE6YuPTLHv/PAqn1nrGn5VOvzk7dEtfrs8lejPlj7YseXm5Ud
OW2Se2PHC77OGXF+898ne1/YtSgwIHXeU4e3dRuff/2fG5o+/8G86YNHPpZy+frN
zrsvbLp59R0/Xf7Hyim3zzxl2Y2PPf34Gz16FhTMXD/+tD/Snm5z27sXZXY5fFHb
29bl/ehfP2fnt761sxd/t/auD6dPveznB0bvPmf3PVFTd734r02Lumxav+jYL3ui
0pOvOffI1tldBk0tGPJldNmY2+/+5tOrp7cpv9M3++OnF6V/t23klx9tuO+mmcs2
T3zzreRL7p8ZxYwa5civ/KCv4aWivBL/xZ6CgOT1zfJLGYTZLtKCv7pj5VWfkwDl
+MfriL12h3rhG/MMacpHWFG6N+duk9/Qqg66u+bK7+Gh7vm3KqTc+dqglz+0zcUp
oQyfnNuIBcWeEu9cjy8gDXcHPMQvv983zj+vZ0ZOz8z0zHTCUkBSn/xqpybF6OGU
Xi4UI0JRfAqDgGem339JCAkmJ588HSldSB+Nyyd/WKNm4ynR0+C51yfPeZRFwF/g
L9LHY0XvYwFK+FLSiQTPRXPfdn47+N3t2wczrx7q7Juj9Hib6PE1Qjn+iR5/QvX4
qHKXNqqGsLn+HwAA//8DANle/0Q=</Template></GraphPadPrismFile>
