# Supplementary material for: The interplay of RNA:DNA hybrid structure and G-quadruplexes determines the outcome of R-loop-replisome collisions
Source: eLife. 2021 Sep 8;10:e72286. doi: 10.7554/eLife.72286 (PMC8479836; doi:10.7554/eLife.72286)
Supplement: Figure 1—source data 1. [file elife-72286-fig1-data1.xlsx]

## Sheet: Sheet2
CGAGGCTTCAACATTATATCTATCCCTCCTTGCTCTAGCGGGCAGCAAGAAGCACAGCACCGCCAGTTACCACGCAGACATCCTGGGGAACTGAGGTAAGCTAGGGTTCCCCGCGTGAAGCGCGGCAATGCGAGGGGAGGATTCTGCAGATGAGGGTAGGATTCCGTTGCAAGGGGAGGATTCCACGCGTTAGAGGATTCCGCAAAGGAAGGGTTCCACAGGAGGGAAGGGCTCTACGCGAGGTGAGGGTTCCACTGATCCGGCAGCTCGAGGGCTCCGACCAAGAGTTCCAGGCCGCTCAAAGGTTCCCCTACGCGAGATTCAGCGCTAGGGTGAAGATTTCTGGGCTACAAGAAAACTCAGCACTAGGTGCCCCACTGCTCACCAGTGTTCTGAACT…
CGAGGCTTCAACATTATATCTATCCCTCCTTGCTCTAGCGGGCAGCAAGAAGCACAGCACCGCCAGTTACCACGCAGACATCCTGGGGAACTGAGGTAAGCTAGGGTTCCCCGCGTGAAGCGCGGCAATGCGAGGGGAGGATTCTGCAGATGAGGGTAGGATTCCGTTGCAAGGGGAGGATTCCACGCGTTAGAGGATTCCGCAAAGGAAGGGTTCCACAGGAGGGAAGGGCTCTACGCGAGGTGAGGGTTCCACTGATCCGGCAGCTCG

## Sheet: Sheet1
C	G	A	G	G	C	T	T	C	A	A	C	A	T	T	A	T	A	T	C	T	A	T	C	C	C	T	C	C	T	T	G	C	T	C	T	A	G	C	G	G	G	C	A	G	C	A	A	G	A
C	G	A	G	G	C	T	T	C	A	A	C	A	T	T	A	T	A	T	C	T	A	T	C	C	C	T	C	C	T	T	G	C	T	C	T	A	G	C	G	G	G	C	A	G	C	A	A	G	A
[truncated: 1,323 more columns]

## Sheet: Sheet3
C
G
A
G
G
C
T
T
C
A
A
C
A
T
T
A
T
A
T
C
T
A
T
C
C
C
T
C
C
T
T
G
C
T
C
T
A
G
C
G
G
G
C
A
G
C
A
A
G
A
A
G
C
A
C
A
G
C
A
C
C
G
C
C
A
G
T
T
A
C
C
A
C
G
C
A
G
A
C
A
T
C
C
T
G
G
G
G
A
A
C
T
G
A
G
G
T
A
A
G	G	C	24	30	-0.111111	100
C	G	C	24	30	-0.111111	101
T	G	C	23	30	-0.132075	102
A	G	C	23	30	-0.132075	103
G	G	C	23	30	-0.132075	104
G	G	C	23	30	-0.132075	105
G	G	C	24	29	-0.0943396	106
T	G	C	24	29	-0.0943396	107
T	G	C	24	29	-0.0943396	108
C	G	C	24	29	-0.0943396	109
C	G	C	24	30	-0.111111	110
C	G	C	24	31	-0.127273	111
C	G	C	24	31	-0.127273	112
G	G	C	25	31	-0.107143	113
C	G	C	25	32	-0.122807	114
G	G	C	26	32	-0.103448	115
T	G	C	26	32	-0.103448	116
G	G	C	27	32	-0.0847458	117
A	G	C	27	32	-0.0847458	118
A	G	C	27	32	-0.0847458	119
G	G	C	28	31	-0.0508475	120
C	G	C	28	32	-0.0666667	121
G	G	C	29	32	-0.0491803	122
C	G	C	29	33	-0.0645161	123
G	G	C	30	32	-0.0322581	124
G	G	C	31	31	0	125
C	G	C	31	31	0	126
A	G	C	31	31	0	127
A	G	C	31	30	0.0163934	128
T	G	C	31	29	0.0333333	129
G	G	C	32	29	0.0491803	130
C	G	C	32	30	0.0322581	131
G	G	C	32	30	0.0322581	132
A	G	C	32	29	0.0491803	133
G	G	C	33	29	0.0645161	134
G	G	C	34	28	0.0967742	135
G	G	C	35	28	0.111111	136
G	G	C	36	28	0.125	137
A	G	C	35	28	0.111111	138
G	G	C	36	27	0.142857	139
G	G	C	36	27	0.142857	140
A	G	C	35	27	0.129032	141
T	G	C	34	27	0.114754	142
T	G	C	34	26	0.133333	143
C	G	C	34	27	0.114754	144
T	G	C	33	27	0.1	145
G	G	C	34	26	0.133333	146
C	G	C	34	27	0.114754	147
A	G	C	34	27	0.114754	148
G	G	C	34	27	0.114754	149
A	G	C	34	27	0.114754	150
T	G	C	34	27	0.114754	151
G	G	C	34	27	0.114754	152
A	G	C	34	26	0.133333	153
G	G	C	35	26	0.147541	154
G	G	C	36	25	0.180328	155
G	G	C	37	25	0.193548	156
T	G	C	36	25	0.180328	157
A	G	C	36	24	0.2	158
G	G	C	37	24	0.213115	159
G	G	C	38	23	0.245902	160
A	G	C	38	22	0.266667	161
T	G	C	37	22	0.254237	162
T	G	C	37	21	0.275862	163
C	G	C	37	21	0.275862	164
C	G	C	37	22	0.254237	165
G	G	C	37	22	0.254237	166
T	G	C	37	22	0.254237	167
T	G	C	37	22	0.254237	168
G	G	C	38	22	0.266667	169
C	G	C	38	22	0.266667	170
A	G	C	38	21	0.288136	171
A	G	C	38	21	0.288136	172
G	G	C	39	20	0.322034	173
G	G	C	39	20	0.322034	174
G	G	C	40	19	0.355932	175
G	G	C	41	19	0.366667	176
A	G	C	40	19	0.355932	177
G	G	C	41	19	0.366667	178
G	G	C	42	18	0.4	179
A	G	C	42	18	0.4	180
T	G	C	42	18	0.4	181
T	G	C	42	17	0.423729	182
C	G	C	42	17	0.423729	183
C	G	C	42	18	0.4	184
A	G	C	41	18	0.389831	185
C	G	C	40	19	0.355932	186
G	G	C	40	19	0.355932	187
C	G	C	39	20	0.322034	188
G	G	C	40	20	0.333333	189
T	G	C	40	20	0.333333	190
T	G	C	40	19	0.355932	191
A	G	C	40	19	0.355932	192
G	G	C	40	19	0.355932	193
A	G	C	40	19	0.355932	194
G	G	C	40	19	0.355932	195
G	G	C	40	19	0.355932	196
A	G	C	40	19	0.355932	197
T	G	C	40	19	0.355932	198
T	G	C	40	19	0.355932	199
C	G	C	39	20	0.322034	200
C	G	C	39	20	0.322034	201
G	G	C	40	20	0.333333	202
C	G	C	40	21	0.311475	203
A	G	C	39	21	0.3	204
A	G	C	38	21	0.288136	205
A	G	C	37	21	0.275862	206
G	G	C	38	21	0.288136	207
G	G	C	39	21	0.3	208
A	G	C	39	20	0.322034	209
A	G	C	39	19	0.344828	210
G	G	C	40	18	0.37931	211
G	G	C	41	17	0.413793	212
G	G	C	41	17	0.413793	213
T	G	C	41	16	0.438596	214
T	G	C	40	16	0.428571	215
C	G	C	40	17	0.403509	216
C	G	C	39	18	0.368421	217
A	G	C	39	18	0.368421	218
C	G	C	39	19	0.344828	219
A	G	C	38	19	0.333333	220
G	G	C	39	18	0.368421	221
G	G	C	39	18	0.368421	222
A	G	C	39	17	0.392857	223
G	G	C	39	17	0.392857	224
G	G	C	39	17	0.392857	225
G	G	C	40	16	0.428571	226
A	G	C	40	16	0.428571	227
A	G	C	40	16	0.428571	228
G	G	C	41	16	0.438596	229
G	G	C	41	16	0.438596	230
G	G	C	42	15	0.473684	231
C	G	C	41	16	0.438596	232
T	G	C	41	16	0.438596	233
C	G	C	40	17	0.403509	234
T	G	C	39	17	0.392857	235
A	G	C	38	17	0.381818	236
C	G	C	37	18	0.345455	237
G	G	C	38	18	0.357143	238
C	G	C	37	19	0.321429	239
G	G	C	37	19	0.321429	240
A	G	C	37	19	0.321429	241
G	G	C	38	19	0.333333	242
G	G	C	39	19	0.344828	243
T	G	C	39	18	0.368421	244
G	G	C	40	18	0.37931	245
A	G	C	39	18	0.368421	246
G	G	C	40	17	0.403509	247
G	G	C	41	17	0.413793	248
G	G	C	41	17	0.413793	249
T	G	C	41	17	0.413793	250
T	G	C	41	17	0.413793	251
C	G	C	40	18	0.37931	252
C	G	C	40	19	0.355932	253
A	G	C	39	19	0.344828	254
C	G	C	38	20	0.310345	255
T	G	C	37	20	0.298246	256
G	G	C	38	20	0.310345	257
A	G	C	38	20	0.310345	258
T	G	C	37	20	0.298246	259
C	G	C	36	21	0.263158	260
C	G	C	36	22	0.241379	261
G	G	C	37	22	0.254237	262
G	G	C	38	22	0.266667	263
C	G	C	38	22	0.266667	264
A	G	C	38	21	0.288136	265
G	G	C	38	21	0.288136	266
C	G	C	38	22	0.266667	267
T	G	C	38	22	0.266667	268
C	G	C	37	23	0.233333	269
G	G	C	38	22	0.266667	270
A	G	C	38	22	0.266667	271
G	G	C	39	22	0.278689	272
G	G	C	39	22	0.278689	273
G	G	C	39	22	0.278689	274
C	G	C	38	23	0.245902	275
T	G	C	37	23	0.233333	276
C	G	C	37	24	0.213115	277
C	G	C	36	25	0.180328	278
G	G	C	36	25	0.180328	279
A	G	C	36	25	0.180328	280
C	G	C	36	26	0.16129	281
C	G	C	36	27	0.142857	282
A	G	C	36	26	0.16129	283
A	G	C	36	25	0.180328	284
G	G	C	37	25	0.193548	285
A	G	C	37	24	0.213115	286
G	G	C	37	24	0.213115	287
T	G	C	37	23	0.233333	288
T	G	C	36	23	0.220339	289
C	G	C	36	24	0.2	290
C	G	C	36	25	0.180328	291
A	G	C	36	25	0.180328	292
G	G	C	36	25	0.180328	293
G	G	C	37	25	0.193548	294
C	G	C	36	26	0.16129	295
C	G	C	35	27	0.129032	296
G	G	C	36	27	0.142857	297
C	G	C	36	28	0.125	298
T	G	C	36	28	0.125	299
C	G	C	36	28	0.125	300
A	G	C	36	27	0.142857	301
A	G	C	35	27	0.129032	302
A	G	C	35	26	0.147541	303
G	G	C	36	26	0.16129	304
G	G	C	37	26	0.174603	305
T	G	C	37	26	0.174603	306
T	G	C	36	26	0.16129	307
C	G	C	35	27	0.129032	308
C	G	C	35	28	0.111111	309
C	G	C	35	29	0.09375	310
C	G	C	34	30	0.0625	311
T	G	C	33	30	0.047619	312
A	G	C	32	30	0.0322581	313
C	G	C	32	31	0.015873	314
G	G	C	33	31	0.03125	315
C	G	C	33	31	0.03125	316
G	G	C	34	30	0.0625	317
A	G	C	34	30	0.0625	318
G	G	C	35	29	0.09375	319
A	G	C	35	29	0.09375	320
T	G	C	34	29	0.0793651	321
T	G	C	33	29	0.0645161	322
C	G	C	33	30	0.047619	323
A	G	C	32	30	0.0322581	324
G	G	C	32	30	0.0322581	325
C	G	C	31	31	0	326
G	G	C	32	31	0.015873	327
C	G	C	32	32	0	328
T	G	C	31	32	-0.015873	329
A	G	C	30	32	-0.0322581	330
G	G	C	30	32	-0.0322581	331
G	G	C	31	31	0	332
G	G	C	32	31	0.015873	333
T	G	C	32	30	0.0322581	334
G	G	C	33	30	0.047619	335
A	G	C	33	30	0.047619	336
A	G	C	33	29	0.0645161	337
G	G	C	33	29	0.0645161	338
A	G	C	33	28	0.0819672	339
T	G	C	32	28	0.0666667	340
T	G	C	32	28	0.0666667	341
T	G	C	31	28	0.0508475	342
C	G	C	30	29	0.0169492	343
T	G	C	30	29	0.0169492	344
G	G	C	30	29	0.0169492	345
G	G	C	31	29	0.0333333	346
G	G	C	31	29	0.0333333	347
C	G	C	30	30	0	348
T	G	C	29	30	-0.0169492	349
A	G	C	29	30	-0.0169492	350
C	G	C	29	31	-0.0333333	351
A	G	C	29	30	-0.0169492	352
A	G	C	29	29	0	353
G	G	C	30	29	0.0169492	354
A	G	C	30	28	0.0344828	355
A	G	C	30	28	0.0344828	356
A	G	C	29	28	0.0175439	357
A	G	C	29	28	0.0175439	358
C	G	C	29	29	0	359
T	G	C	29	28	0.0175439	360
C	G	C	29	28	0.0175439	361
A	G	C	28	28	0	362
G	G	C	28	28	0	363
C	G	C	28	28	0	364
A	G	C	28	28	0	365
C	G	C	27	29	-0.0357143	366
T	G	C	27	28	-0.0181818	367
A	G	C	27	28	-0.0181818	368
G	G	C	28	27	0.0181818	369
G	G	C	28	27	0.0181818	370
T	G	C	28	27	0.0181818	371
G	G	C	28	27	0.0181818	372
C	G	C	27	28	-0.0181818	373
C	G	C	26	29	-0.0545455	374
C	G	C	26	29	-0.0545455	375
C	G	C	26	30	-0.0714286	376
A	G	C	26	29	-0.0545455	377
C	G	C	26	29	-0.0545455	378
T	G	C	25	29	-0.0740741	379
G	G	C	26	29	-0.0545455	380
C	G	C	26	29	-0.0545455	381
T	G	C	26	28	-0.037037	382
C	G	C	26	29	-0.0545455	383
A	G	C	26	29	-0.0545455	384
C	G	C	25	30	-0.0909091	385
C	G	C	25	31	-0.107143	386
A	G	C	24	31	-0.127273	387
G	G	C	25	31	-0.107143	388
T	G	C	25	31	-0.107143	389
G	G	C	26	30	-0.0714286	390
T	G	C	26	29	-0.0545455	391
T	G	C	26	29	-0.0545455	392
C	G	C	25	30	-0.0909091	393
T	G	C	24	30	-0.111111	394
G	G	C	25	29	-0.0740741	395
A	G	C	25	28	-0.0566038	396
A	G	C	24	28	-0.0769231	397
C	G	C	24	28	-0.0769231	398
T	G	C	24	28	-0.0769231	399
A	G	C	24	27	-0.0588235	400
C	G	C	24	28	-0.0769231	401
A	G	C	24	28	-0.0769231	402
C	G	C	24	29	-0.0943396	403
G	G	C	24	29	-0.0943396	404
A	G	C	23	29	-0.115385	405
G	G	C	24	29	-0.0943396	406
G	G	C	25	29	-0.0740741	407
G	G	C	26	28	-0.037037	408
C	G	C	26	28	-0.037037	409
C	G	C	26	28	-0.037037	410
G	G	C	27	27	0	411
A	G	C	27	27	0	412
T	G	C	27	27	0	413
A	G	C	27	26	0.0188679	414
G	G	C	27	26	0.0188679	415
G	G	C	28	25	0.0566038	416
G	G	C	28	25	0.0566038	417
C	G	C	28	26	0.037037	418
C	G	C	27	27	0	419
G	G	C	28	27	0.0181818	420
G	G	C	29	27	0.0357143	421
T	G	C	29	27	0.0357143	422
A	G	C	29	26	0.0545455	423
G	G	C	30	26	0.0714286	424
A	G	C	29	26	0.0545455	425
A	G	C	29	25	0.0740741	426
A	G	C	28	25	0.0566038	427
G	G	C	29	24	0.0943396	428
C	G	C	29	25	0.0740741	429
C	G	C	29	26	0.0545455	430
G	G	C	29	26	0.0545455	431
A	G	C	28	26	0.037037	432
A	G	C	27	26	0.0188679	433
A	G	C	27	26	0.0188679	434
G	G	C	27	26	0.0188679	435
C	G	C	27	27	0	436
C	G	C	27	28	-0.0181818	437
G	G	C	27	28	-0.0181818	438
C	G	C	27	29	-0.0357143	439
C	G	C	27	30	-0.0526316	440
G	G	C	28	30	-0.0344828	441
C	G	C	28	31	-0.0508475	442
T	G	C	28	30	-0.0344828	443
G	G	C	29	30	-0.0169492	444
C	G	C	28	31	-0.0508475	445
C	G	C	27	32	-0.0847458	446
G	G	C	27	32	-0.0847458	447
C	G	C	27	32	-0.0847458	448
C	G	C	27	33	-0.1	449
A	G	C	27	33	-0.1	450
T	G	C	27	32	-0.0847458	451
G	G	C	28	32	-0.0666667	452
C	G	C	28	33	-0.0819672	453
C	G	C	27	34	-0.114754	454
G	G	C	28	34	-0.0967742	455
C	G	C	28	35	-0.111111	456
G	G	C	29	35	-0.09375	457
T	G	C	29	35	-0.09375	458
C	G	C	29	35	-0.09375	459
A	G	C	29	35	-0.09375	460
G	G	C	30	34	-0.0625	461
C	G	C	30	35	-0.0769231	462
A	G	C	29	35	-0.09375	463
A	G	C	29	34	-0.0793651	464
G	G	C	30	34	-0.0625	465
A	G	C	30	33	-0.047619	466
G	G	C	31	33	-0.03125	467
G	G	C	32	33	-0.0153846	468
A	G	C	31	33	-0.03125	469
A	G	C	30	33	-0.047619	470
A	G	C	30	33	-0.047619	471
A	G	C	29	33	-0.0645161	472
G	G	C	30	32	-0.0322581	473
G	G	C	31	31	0	474
G	G	C	32	30	0.0322581	475
A	G	C	32	29	0.0491803	476
G	G	C	33	29	0.0645161	477
G	G	C	34	28	0.0967742	478
G	G	C	35	28	0.111111	479
G	G	C	35	28	0.111111	480
G	G	C	36	27	0.142857	481
G	G	C	37	27	0.15625	482
C	G	C	37	27	0.15625	483
G	G	C	38	27	0.169231	484
T	G	C	38	26	0.1875	485
C	G	C	38	26	0.1875	486
C	G	C	38	27	0.169231	487
A	G	C	37	27	0.15625	488
G	G	C	38	27	0.169231	489
C	G	C	37	28	0.138462	490
G	G	C	38	28	0.151515	491
C	G	C	38	29	0.134328	492
G	G	C	39	28	0.164179	493
G	G	C	40	28	0.176471	494
G	G	C	40	28	0.176471	495
C	G	C	40	29	0.15942	496
C	G	C	40	30	0.142857	497
G	G	C	41	29	0.171429	498
A	G	C	41	29	0.171429	499
C	G	C	41	30	0.15493	500
T	G	C	41	29	0.171429	501
G	G	C	42	29	0.183099	502
C	G	C	42	29	0.183099	503
T	G	C	41	29	0.171429	504
G	G	C	42	29	0.183099	505
C	G	C	41	30	0.15493	506
A	G	C	40	30	0.142857	507
C	G	C	39	31	0.114286	508
T	G	C	39	30	0.130435	509
G	G	C	40	29	0.15942	510
G	G	C	40	29	0.15942	511
G	G	C	41	29	0.171429	512
G	G	C	42	29	0.183099	513
G	G	C	43	29	0.194444	514
G	G	C	43	29	0.194444	515
G	G	C	43	29	0.194444	516
G	G	C	43	29	0.194444	517
G	G	C	44	28	0.222222	518
G	G	C	45	27	0.25	519
G	G	C	45	27	0.25	520
G	G	C	45	27	0.25	521
G	G	C	46	27	0.260274	522
G	G	C	47	27	0.27027	523
T	G	C	46	27	0.260274	524
T	G	C	46	27	0.260274	525
T	G	C	46	27	0.260274	526
A	G	C	46	27	0.260274	527
C	G	C	45	28	0.232877	528
G	G	C	46	27	0.260274	529
G	G	C	47	26	0.287671	530
G	G	C	47	26	0.287671	531
C	G	C	47	27	0.27027	532
G	G	C	48	27	0.28	533
A	G	C	48	27	0.28	534
T	G	C	47	27	0.27027	535
T	G	C	47	26	0.287671	536
T	G	C	47	25	0.305556	537
A	G	C	46	25	0.295775	538
G	G	C	47	24	0.323944	539
A	G	C	47	23	0.342857	540
G	G	C	47	23	0.342857	541
C	G	C	47	23	0.342857	542
A	G	C	47	23	0.342857	543
C	G	C	46	24	0.314286	544
G	G	C	47	23	0.342857	545
A	G	C	47	22	0.362319	546
G	G	C	47	22	0.362319	547
G	G	C	48	21	0.391304	548
G	G	C	49	20	0.42029	549
T	G	C	49	20	0.42029	550
G	G	C	50	20	0.428571	551
C	G	C	49	21	0.4	552
C	G	C	49	21	0.4	553
A	G	C	49	20	0.42029	554
C	G	C	48	21	0.391304	555
G	G	C	49	20	0.42029	556
C	G	C	48	21	0.391304	557
T	G	C	48	21	0.391304	558
G	G	C	49	20	0.42029	559
C	G	C	49	21	0.4	560
G	G	C	49	21	0.4	561
C	G	C	49	21	0.4	562
A	G	C	49	21	0.4	563
A	G	C	49	21	0.4	564
G	G	C	49	21	0.4	565
G	G	C	50	21	0.408451	566
G	G	C	50	21	0.408451	567
G	G	C	50	21	0.408451	568
A	G	C	50	21	0.408451	569
G	G	C	51	21	0.416667	570
C	G	C	51	22	0.39726	571
A	G	C	51	22	0.39726	572
G	G	C	51	22	0.39726	573
G	G	C	51	22	0.39726	574
G	G	C	51	22	0.39726	575
G	G	C	52	22	0.405405	576
T	G	C	51	22	0.39726	577
T	G	C	50	22	0.388889	578
C	G	C	49	23	0.361111	579
G	G	C	49	23	0.361111	580
C	G	C	48	24	0.333333	581
G	G	C	48	24	0.333333	582
C	G	C	48	24	0.333333	583
T	G	C	47	24	0.323944	584
A	G	C	47	24	0.323944	585
G	G	C	48	23	0.352113	586
G	G	C	49	22	0.380282	587
G	G	C	50	22	0.388889	588
C	G	C	49	23	0.361111	589
A	G	C	49	22	0.380282	590
C	G	C	48	23	0.352113	591
C	G	C	48	23	0.352113	592
A	G	C	47	23	0.342857	593
C	G	C	46	24	0.314286	594
G	G	C	46	24	0.314286	595
C	G	C	46	24	0.314286	596
T	G	C	46	23	0.333333	597
G	G	C	46	23	0.333333	598
C	G	C	46	24	0.314286	599
T	G	C	46	23	0.333333	600
G	G	C	47	23	0.342857	601
G	G	C	47	23	0.342857	602
A	G	C	47	22	0.362319	603
G	G	C	48	22	0.371429	604
A	G	C	47	22	0.362319	605
G	G	C	48	21	0.391304	606
T	G	C	48	21	0.391304	607
T	G	C	48	20	0.411765	608
G	G	C	49	20	0.42029	609
G	G	C	49	20	0.42029	610
G	G	C	49	20	0.42029	611
G	G	C	49	20	0.42029	612
G	G	C	49	20	0.42029	613
G	G	C	49	20	0.42029	614
G	G	C	49	20	0.42029	615
G	G	C	49	20	0.42029	616
G	G	C	49	20	0.42029	617
G	G	C	49	20	0.42029	618
G	G	C	49	20	0.42029	619
T	G	C	48	20	0.411765	620
G	G	C	48	20	0.411765	621
G	G	C	48	20	0.411765	622
A	G	C	47	20	0.402985	623
G	G	C	48	20	0.411765	624
A	G	C	48	20	0.411765	625
T	G	C	48	20	0.411765	626
C	G	C	48	21	0.391304	627
G	G	C	49	20	0.42029	628
G	G	C	49	20	0.42029	629
A	G	C	48	20	0.411765	630
G	G	C	48	20	0.411765	631
G	G	C	49	19	0.441176	632
A	G	C	48	19	0.432836	633
T	G	C	48	19	0.432836	634
T	G	C	48	19	0.432836	635
T	G	C	48	19	0.432836	636
C	G	C	48	20	0.411765	637
T	G	C	48	20	0.411765	638
A	G	C	47	20	0.402985	639
C	G	C	47	21	0.382353	640
A	G	C	46	21	0.373134	641
C	G	C	46	21	0.373134	642
G	G	C	47	21	0.382353	643
A	G	C	47	20	0.402985	644
C	G	C	46	21	0.373134	645
C	G	C	46	22	0.352941	646
T	G	C	45	22	0.343284	647
G	G	C	45	22	0.343284	648
A	G	C	44	22	0.333333	649
T	G	C	44	22	0.333333	650
C	G	C	43	23	0.30303	651
C	G	C	43	23	0.30303	652
G	G	C	44	22	0.333333	653
C	G	C	44	23	0.313433	654
G	G	C	45	22	0.343284	655
G	G	C	45	22	0.343284	656
T	G	C	45	21	0.363636	657
T	G	C	45	21	0.363636	658
T	G	C	44	21	0.353846	659
G	G	C	45	20	0.384615	660
C	G	C	44	21	0.353846	661
G	G	C	45	20	0.384615	662
G	G	C	46	20	0.393939	663
G	G	C	47	20	0.402985	664
G	G	C	47	20	0.402985	665
C	G	C	46	21	0.373134	666
A	G	C	45	21	0.363636	667
G	G	C	45	21	0.363636	668
G	G	C	46	21	0.373134	669
G	G	C	46	21	0.373134	670
G	G	C	47	20	0.402985	671
G	G	C	48	20	0.411765	672
A	G	C	47	20	0.402985	673
A	G	C	46	20	0.393939	674
G	G	C	46	20	0.393939	675
G	G	C	46	20	0.393939	676
T	G	C	46	20	0.393939	677
T	G	C	46	20	0.393939	678
C	G	C	46	20	0.393939	679
G	G	C	46	20	0.393939	680
G	G	C	47	19	0.424242	681
T	G	C	46	19	0.415385	682
G	G	C	47	18	0.446154	683
G	G	C	48	18	0.454545	684
G	G	C	49	18	0.462687	685
T	G	C	48	18	0.454545	686
T	G	C	47	18	0.446154	687
C	G	C	46	19	0.415385	688
C	G	C	46	19	0.415385	689
G	G	C	47	19	0.424242	690
C	G	C	47	19	0.424242	691
G	G	C	48	18	0.454545	692
G	G	C	49	18	0.462687	693
T	G	C	49	17	0.484848	694
G	G	C	49	17	0.484848	695
G	G	C	50	16	0.515152	696
A	G	C	50	16	0.515152	697
G	G	C	50	16	0.515152	698
C	G	C	50	16	0.515152	699
T	G	C	50	16	0.515152	700
C	G	C	49	17	0.484848	701
T	G	C	48	17	0.476923	702
G	G	C	49	17	0.484848	703
G	G	C	49	17	0.484848	704
A	G	C	49	17	0.484848	705
G	G	C	49	17	0.484848	706
A	G	C	49	17	0.484848	707
T	G	C	49	17	0.484848	708
C	G	C	48	18	0.454545	709
G	G	C	48	18	0.454545	710
G	G	C	48	18	0.454545	711
A	G	C	47	18	0.446154	712
G	G	C	47	18	0.446154	713
G	G	C	47	18	0.446154	714
A	G	C	46	18	0.4375	715
T	G	C	45	18	0.428571	716
T	G	C	44	18	0.419355	717
T	G	C	43	18	0.409836	718
C	G	C	42	19	0.377049	719
T	G	C	42	19	0.377049	720
A	G	C	41	19	0.366667	721
C	G	C	40	20	0.333333	722
A	G	C	40	20	0.333333	723
C	G	C	39	21	0.3	724
G	G	C	40	21	0.311475	725
A	G	C	40	21	0.311475	726
C	G	C	40	21	0.311475	727
C	G	C	39	22	0.278689	728
T	G	C	38	22	0.266667	729
G	G	C	39	22	0.278689	730
A	G	C	38	22	0.266667	731
T	G	C	37	22	0.254237	732
C	G	C	37	23	0.233333	733
C	G	C	37	24	0.213115	734
G	G	C	38	24	0.225806	735
C	G	C	38	25	0.206349	736
G	G	C	39	24	0.238095	737
G	G	C	40	24	0.25	738
T	G	C	40	24	0.25	739
T	G	C	40	23	0.269841	740
T	G	C	40	23	0.269841	741
G	G	C	41	22	0.301587	742
C	G	C	40	23	0.269841	743
G	G	C	41	23	0.28125	744
G	G	C	42	22	0.3125	745
G	G	C	43	21	0.34375	746
G	G	C	44	21	0.353846	747
A	G	C	43	21	0.34375	748
A	G	C	43	21	0.34375	749
G	G	C	44	21	0.353846	750
G	G	C	45	20	0.384615	751
G	G	C	46	19	0.415385	752
G	G	C	46	19	0.415385	753
G	G	C	47	18	0.446154	754
A	G	C	46	18	0.4375	755
A	G	C	45	18	0.428571	756
G	G	C	46	18	0.4375	757
G	G	C	47	18	0.446154	758
T	G	C	47	18	0.446154	759
T	G	C	46	18	0.4375	760
C	G	C	46	18	0.4375	761
G	G	C	46	18	0.4375	762
G	G	C	46	18	0.4375	763
T	G	C	45	18	0.428571	764
G	G	C	45	18	0.428571	765
G	G	C	46	17	0.460317	766
G	G	C	47	17	0.46875	767
T	G	C	46	17	0.460317	768
T	G	C	45	17	0.451613	769
C	G	C	44	18	0.419355	770
C	G	C	43	19	0.387097	771
G	G	C	43	19	0.387097	772
C	G	C	43	20	0.365079	773
G	G	C	44	20	0.375	774
G	G	C	44	20	0.375	775
A	G	C	43	20	0.365079	776
A	G	C	43	20	0.365079	777
C	G	C	43	21	0.34375	778
T	G	C	43	20	0.365079	779
G	G	C	43	20	0.365079	780
C	G	C	42	21	0.333333	781
G	G	C	43	21	0.34375	782
C	G	C	42	22	0.3125	783
G	G	C	42	22	0.3125	784
A	G	C	41	22	0.301587	785
G	G	C	42	22	0.3125	786
C	G	C	42	23	0.292308	787
C	G	C	42	23	0.292308	788
A	G	C	42	22	0.3125	789
G	G	C	42	22	0.3125	790
G	G	C	43	21	0.34375	791
G	G	C	43	21	0.34375	792
T	G	C	42	21	0.333333	793
G	G	C	43	21	0.34375	794
C	G	C	42	22	0.3125	795
T	G	C	41	22	0.301587	796
G	G	C	42	22	0.3125	797
G	G	C	42	22	0.3125	798
C	G	C	42	22	0.3125	799
G	G	C	43	22	0.323077	800
T	G	C	43	21	0.34375	801
G	G	C	44	21	0.353846	802
T	G	C	43	21	0.34375	803
G	G	C	43	21	0.34375	804
C	G	C	43	22	0.323077	805
G	G	C	43	22	0.323077	806
C	G	C	43	23	0.30303	807
T	G	C	43	23	0.30303	808
G	G	C	44	22	0.333333	809
C	G	C	43	23	0.30303	810
C	G	C	42	24	0.272727	811
C	G	C	42	25	0.253731	812
C	G	C	41	26	0.223881	813
C	G	C	40	27	0.19403	814
C	G	C	40	28	0.176471	815
C	G	C	40	29	0.15942	816
C	G	C	40	30	0.142857	817
C	G	C	40	31	0.126761	818
C	G	C	40	31	0.126761	819
C	G	C	40	32	0.111111	820
C	G	C	40	33	0.0958904	821
C	G	C	40	33	0.0958904	822
C	G	C	40	34	0.0810811	823
C	G	C	40	34	0.0810811	824
C	G	C	39	35	0.0540541	825
C	G	C	39	36	0.04	826
C	G	C	39	36	0.04	827
C	G	C	39	36	0.04	828
G	G	C	40	36	0.0526316	829
T	G	C	39	36	0.04	830
T	G	C	39	36	0.04	831
C	G	C	39	37	0.0263158	832
A	G	C	39	36	0.04	833
G	G	C	40	35	0.0666667	834
A	G	C	39	35	0.0540541	835
G	G	C	40	34	0.0810811	836
G	G	C	40	34	0.0810811	837
A	G	C	39	34	0.0684932	838
T	G	C	39	34	0.0684932	839
T	G	C	39	34	0.0684932	840
T	G	C	39	34	0.0684932	841
T	G	C	38	34	0.0555556	842
A	G	C	38	33	0.0704225	843
G	G	C	38	33	0.0704225	844
C	G	C	37	34	0.0422535	845
A	G	C	36	34	0.0285714	846
C	G	C	35	35	0	847
A	G	C	35	35	0	848
A	G	C	35	35	0	849
C	G	C	34	36	-0.0285714	850
T	G	C	33	36	-0.0434783	851
C	G	C	32	37	-0.0724638	852
C	G	C	31	38	-0.101449	853
A	G	C	30	38	-0.117647	854
A	G	C	30	38	-0.117647	855
T	G	C	30	38	-0.117647	856
T	G	C	29	38	-0.134328	857
G	G	C	29	38	-0.134328	858
T	G	C	29	38	-0.134328	859
G	G	C	30	38	-0.117647	860
C	G	C	30	38	-0.117647	861
T	G	C	29	38	-0.134328	862
G	G	C	29	38	-0.134328	863
C	G	C	29	39	-0.147059	864
G	G	C	29	39	-0.147059	865
A	G	C	28	39	-0.164179	866
T	G	C	27	39	-0.181818	867
T	G	C	27	39	-0.181818	868
C	G	C	27	40	-0.19403	869
T	G	C	27	39	-0.181818	870
G	G	C	28	38	-0.151515	871
G	G	C	28	38	-0.151515	872
T	G	C	28	37	-0.138462	873
T	G	C	27	37	-0.15625	874
G	G	C	27	37	-0.15625	875
T	G	C	27	37	-0.15625	876
G	G	C	28	37	-0.138462	877
C	G	C	28	37	-0.138462	878
C	G	C	28	38	-0.151515	879
G	G	C	28	38	-0.151515	880
A	G	C	28	37	-0.138462	881
G	G	C	28	37	-0.138462	882
T	G	C	28	36	-0.125	883
T	G	C	27	36	-0.142857	884
G	G	C	28	36	-0.125	885
C	G	C	27	37	-0.15625	886
G	G	C	28	36	-0.125	887
A	G	C	28	35	-0.111111	888
G	G	C	29	35	-0.09375	889
A	G	C	28	35	-0.111111	890
G	G	C	28	35	-0.111111	891
A	G	C	27	35	-0.129032	892
G	G	C	28	35	-0.111111	893
G	G	C	28	35	-0.111111	894
C	G	C	28	35	-0.111111	895
T	G	C	28	35	-0.111111	896
A	G	C	27	35	-0.129032	897
A	G	C	26	35	-0.147541	898
G	G	C	27	34	-0.114754	899
G	G	C	27	34	-0.114754	900
G	G	C	28	34	-0.0967742	901
T	G	C	27	34	-0.114754	902
G	G	C	28	34	-0.0967742	903
A	G	C	27	34	-0.114754	904
A	G	C	27	33	-0.1	905
A	G	C	26	33	-0.118644	906
A	G	C	26	32	-0.103448	907
G	G	C	27	32	-0.0847458	908
C	G	C	26	33	-0.118644	909
T	G	C	26	32	-0.103448	910
G	G	C	27	31	-0.0689655	911
C	G	C	27	31	-0.0689655	912
A	G	C	27	30	-0.0526316	913
C	G	C	27	30	-0.0526316	914
A	G	C	27	29	-0.0357143	915
A	G	C	27	28	-0.0181818	916
G	G	C	28	27	0.0181818	917
G	G	C	29	26	0.0545455	918
A	G	C	29	25	0.0740741	919
G	G	C	30	24	0.111111	920
G	G	C	31	23	0.148148	921
G	G	C	32	22	0.185185	922
G	G	C	33	21	0.222222	923
A	G	C	33	20	0.245283	924
T	G	C	33	19	0.269231	925
T	G	C	33	18	0.294118	926
C	G	C	33	18	0.294118	927
G	G	C	34	17	0.333333	928
G	G	C	34	17	0.333333	929
A	G	C	34	17	0.333333	930
G	G	C	35	17	0.346154	931
G	G	C	36	16	0.384615	932
G	G	C	37	16	0.396226	933
T	G	C	36	16	0.384615	934
T	G	C	36	16	0.384615	935
T	G	C	35	16	0.372549	936
A	G	C	34	16	0.36	937
G	G	C	35	16	0.372549	938
A	G	C	35	16	0.372549	939
G	G	C	36	16	0.384615	940
G	G	C	37	16	0.396226	941
G	G	C	38	16	0.407407	942
T	G	C	38	16	0.407407	943
T	G	C	37	16	0.396226	944
C	G	C	37	16	0.396226	945
C	G	C	37	17	0.37037	946
G	G	C	38	16	0.407407	947
C	G	C	38	17	0.381818	948
G	G	C	39	17	0.392857	949
G	G	C	40	16	0.428571	950
C	G	C	40	17	0.403509	951
A	G	C	40	16	0.428571	952
C	G	C	40	16	0.428571	953
T	G	C	40	16	0.428571	954
G	G	C	41	16	0.438596	955
C	G	C	41	17	0.413793	956
G	G	C	42	17	0.423729	957
C	G	C	41	18	0.389831	958
C	G	C	41	19	0.366667	959
G	G	C	41	19	0.366667	960
C	G	C	41	19	0.366667	961
A	G	C	41	19	0.366667	962
G	G	C	41	19	0.366667	963
T	G	C	41	18	0.389831	964
G	G	C	41	18	0.389831	965
C	G	C	41	19	0.366667	966
T	G	C	41	19	0.366667	967
G	G	C	42	19	0.377049	968
C	G	C	42	19	0.377049	969
C	G	C	42	20	0.354839	970
C	G	C	41	21	0.322581	971
G	G	C	41	21	0.322581	972
A	G	C	41	21	0.322581	973
G	G	C	42	21	0.333333	974
G	G	C	42	21	0.333333	975
G	G	C	43	21	0.34375	976
T	G	C	42	21	0.333333	977
T	G	C	42	20	0.354839	978
C	G	C	42	20	0.354839	979
G	G	C	42	20	0.354839	980
G	G	C	43	20	0.365079	981
A	G	C	42	20	0.354839	982
G	G	C	43	20	0.365079	983
C	G	C	43	21	0.34375	984
A	G	C	42	21	0.333333	985
A	G	C	42	20	0.354839	986
T	G	C	41	20	0.344262	987
T	G	C	41	20	0.344262	988
C	G	C	40	21	0.311475	989
C	G	C	40	22	0.290323	990
G	G	C	40	22	0.290323	991
G	G	C	41	22	0.301587	992
T	G	C	40	22	0.290323	993
T	G	C	39	22	0.278689	994
G	G	C	40	21	0.311475	995
T	G	C	40	21	0.311475	996
G	G	C	41	21	0.322581	997
C	G	C	41	22	0.301587	998
C	G	C	40	23	0.269841	999
G	G	C	40	23	0.269841	1000
T	G	C	39	23	0.258065	1001
G	G	C	40	23	0.269841	1002
A	G	C	39	23	0.258065	1003
T	G	C	39	23	0.258065	1004
C	G	C	39	24	0.238095	1005
C	G	C	39	25	0.21875	1006
T	G	C	39	25	0.21875	1007
T	G	C	38	25	0.206349	1008
G	G	C	39	24	0.238095	1009
G	G	C	40	24	0.25	1010
T	G	C	39	24	0.238095	1011
T	G	C	39	23	0.258065	1012
G	G	C	40	23	0.269841	1013
T	G	C	40	22	0.290323	1014
G	G	C	41	22	0.301587	1015
C	G	C	41	23	0.28125	1016
T	G	C	40	23	0.269841	1017
G	G	C	40	23	0.269841	1018
A	G	C	40	23	0.269841	1019
G	G	C	40	23	0.269841	1020
T	G	C	39	23	0.258065	1021
T	G	C	38	23	0.245902	1022
G	G	C	38	23	0.245902	1023
C	G	C	38	24	0.225806	1024
G	G	C	39	24	0.238095	1025
G	G	C	40	24	0.25	1026
T	G	C	40	23	0.269841	1027
G	G	C	40	23	0.269841	1028
A	G	C	39	23	0.258065	1029
G	G	C	40	23	0.269841	1030
G	G	C	40	23	0.269841	1031
G	G	C	40	23	0.269841	1032
A	G	C	39	23	0.258065	1033
A	G	C	39	23	0.258065	1034
A	G	C	39	23	0.258065	1035
G	G	C	40	23	0.269841	1036
G	G	C	41	23	0.28125	1037
G	G	C	41	23	0.28125	1038
A	G	C	41	23	0.28125	1039
A	G	C	40	23	0.269841	1040
G	G	C	40	23	0.269841	1041
G	G	C	40	23	0.269841	1042
G	G	C	41	23	0.28125	1043
A	G	C	41	23	0.28125	1044
A	G	C	41	22	0.301587	1045
A	G	C	41	21	0.322581	1046
G	G	C	41	21	0.322581	1047
C	G	C	41	21	0.322581	1048
T	G	C	40	21	0.311475	1049
C	G	C	39	22	0.278689	1050
A	G	C	39	21	0.3	1051
G	G	C	40	21	0.311475	1052
A	G	C	40	20	0.333333	1053
G	G	C	41	20	0.344262	1054
G	G	C	41	20	0.344262	1055
G	G	C	42	19	0.377049	1056
T	G	C	41	19	0.366667	1057
T	G	C	41	18	0.389831	1058
C	G	C	41	18	0.389831	1059
C	G	C	40	19	0.355932	1060
G	G	C	41	18	0.389831	1061
A	G	C	41	18	0.389831	1062
G	G	C	41	18	0.389831	1063
C	G	C	41	19	0.366667	1064
T	G	C	40	19	0.355932	1065
A	G	C	40	18	0.37931	1066
T	G	C	40	18	0.37931	1067
C	G	C	39	19	0.344828	1068
C	G	C	39	19	0.344828	1069
T	G	C	39	18	0.368421	1070
G	G	C	40	17	0.403509	1071
A	G	C	39	17	0.392857	1072
G	G	C	40	17	0.403509	1073
G	G	C	40	17	0.403509	1074
G	G	C	40	17	0.403509	1075
T	G	C	39	17	0.392857	1076
G	G	C	40	17	0.403509	1077
C	G	C	40	18	0.37931	1078
G	G	C	41	17	0.413793	1079
A	G	C	40	17	0.403509	1080
A	G	C	39	17	0.392857	1081
G	G	C	40	17	0.403509	1082
C	G	C	39	18	0.368421	1083
T	G	C	39	17	0.392857	1084
G	G	C	40	17	0.403509	1085
C	G	C	40	18	0.37931	1086
A	G	C	40	18	0.37931	1087
C	G	C	40	19	0.355932	1088
A	G	C	40	18	0.37931	1089
A	G	C	40	17	0.403509	1090
G	G	C	40	17	0.403509	1091
G	G	C	40	17	0.403509	1092
G	G	C	41	17	0.413793	1093
C	G	C	41	18	0.389831	1094
A	G	C	40	18	0.37931	1095
G	G	C	41	18	0.389831	1096
G	G	C	41	18	0.389831	1097
G	G	C	42	17	0.423729	1098
T	G	C	42	16	0.448276	1099
T	G	C	41	16	0.438596	1100
C	G	C	41	17	0.413793	1101
C	G	C	40	18	0.37931	1102
G	G	C	41	18	0.389831	1103
A	G	C	41	18	0.389831	1104
G	G	C	42	17	0.423729	1105
G	G	C	43	16	0.457627	1106
G	G	C	44	16	0.466667	1107
T	G	C	44	16	0.466667	1108
T	G	C	43	16	0.457627	1109
C	G	C	42	17	0.423729	1110
C	G	C	42	18	0.4	1111
G	G	C	43	18	0.409836	1112
C	G	C	42	19	0.377049	1113
G	G	C	43	19	0.387097	1114
G	G	C	43	19	0.387097	1115
C	G	C	43	19	0.387097	1116
A	G	C	43	19	0.387097	1117
C	G	C	42	20	0.354839	1118
T	G	C	42	20	0.354839	1119
G	G	C	42	20	0.354839	1120
C	G	C	42	21	0.333333	1121
G	G	C	43	21	0.34375	1122
T	G	C	42	21	0.333333	1123
G	G	C	43	20	0.365079	1124
A	G	C	42	20	0.354839	1125
G	G	C	42	20	0.354839	1126
C	G	C	42	21	0.333333	1127
C	G	C	41	22	0.301587	1128
C	G	C	41	23	0.28125	1129
C	G	C	40	24	0.25	1130
G	G	C	40	24	0.25	1131
G	G	C	40	24	0.25	1132
T	G	C	40	24	0.25	1133
G	G	C	41	24	0.261538	1134
C	G	C	41	25	0.242424	1135
C	G	C	40	26	0.212121	1136
G	G	C	40	26	0.212121	1137
C	G	C	39	27	0.181818	1138
G	G	C	40	27	0.19403	1139
C	G	C	40	28	0.176471	1140
T	G	C	39	28	0.164179	1141
G	G	C	39	28	0.164179	1142
C	G	C	38	29	0.134328	1143
C	G	C	38	30	0.117647	1144
C	G	C	38	31	0.101449	1145
A	G	C	38	31	0.101449	1146
A	G	C	37	31	0.0882353	1147
A	G	C	37	30	0.104478	1148
G	G	C	38	30	0.117647	1149
G	G	C	39	29	0.147059	1150
T	G	C	39	29	0.147059	1151
T	G	C	38	29	0.134328	1152
C	G	C	38	30	0.117647	1153
G	G	C	38	30	0.117647	1154
G	G	C	38	30	0.117647	1155
A	G	C	37	30	0.104478	1156
G	G	C	38	30	0.117647	1157
G	G	C	39	30	0.130435	1158
G	G	C	40	29	0.15942	1159
T	G	C	40	28	0.176471	1160
T	G	C	39	28	0.164179	1161
T	G	C	39	28	0.164179	1162
T	G	C	38	28	0.151515	1163
A	G	C	38	27	0.169231	1164
A	G	C	38	27	0.169231	1165
T	G	C	38	27	0.169231	1166
G	G	C	39	27	0.181818	1167
C	G	C	39	27	0.181818	1168
G	G	C	40	26	0.212121	1169
A	G	C	40	26	0.212121	1170
T	G	C	39	26	0.2	1171
T	G	C	39	26	0.2	1172
C	G	C	38	27	0.169231	1173
C	G	C	37	28	0.138462	1174
G	G	C	37	28	0.138462	1175
G	G	C	38	28	0.151515	1176
T	G	C	37	28	0.138462	1177
T	G	C	37	27	0.15625	1178
G	G	C	37	27	0.15625	1179
G	G	C	38	27	0.169231	1180
G	G	C	39	27	0.181818	1181
C	G	C	38	28	0.151515	1182
T	G	C	38	27	0.169231	1183
G	G	C	39	27	0.181818	1184
T	G	C	38	27	0.169231	1185
G	G	C	39	26	0.2	1186
A	G	C	39	26	0.2	1187
T	G	C	39	25	0.21875	1188
T	G	C	39	25	0.21875	1189
C	G	C	39	26	0.2	1190
T	G	C	38	26	0.1875	1191
G	G	C	38	26	0.1875	1192
G	G	C	38	26	0.1875	1193
T	G	C	38	25	0.206349	1194
T	G	C	38	25	0.206349	1195
A	G	C	37	25	0.193548	1196
T	G	C	36	25	0.180328	1197
G	G	C	36	25	0.180328	1198
C	G	C	36	26	0.16129	1199
C	G	C	36	27	0.142857	1200
A	G	C	36	26	0.16129	1201
A	G	C	36	25	0.180328	1202
G	G	C	36	25	0.180328	1203
T	G	C	36	25	0.180328	1204
T	G	C	35	25	0.166667	1205
G	G	C	35	25	0.166667	1206
C	G	C	34	26	0.133333	1207
G	G	C	35	26	0.147541	1208
C	G	C	35	27	0.129032	1209
G	G	C	36	26	0.16129	1210
A	G	C	36	25	0.180328	1211
G	G	C	36	25	0.180328	1212
G	G	C	37	24	0.213115	1213
G	G	C	37	24	0.213115	1214
G	G	C	37	24	0.213115	1215
A	G	C	37	23	0.233333	1216
G	G	C	38	23	0.245902	1217
G	G	C	39	22	0.278689	1218
G	G	C	40	22	0.290323	1219
G	G	C	40	22	0.290323	1220
A	G	C	40	21	0.311475	1221
A	G	C	39	21	0.3	1222
G	G	C	40	21	0.311475	1223
A	G	C	39	21	0.3	1224
G	G	C	40	21	0.311475	1225
A	G	C	39	21	0.3	1226
C	G	C	39	21	0.3	1227
G	G	C	40	20	0.333333	1228
G	G	C	41	19	0.366667	1229
C	G	C	41	19	0.366667	1230
T	G	C	40	19	0.355932	1231
C	G	C	39	20	0.322034	1232
G	G	C	40	20	0.333333	1233
G	G	C	40	20	0.333333	1234
A	G	C	40	19	0.355932	1235
G	G	C	41	18	0.389831	1236
G	G	C	41	18	0.389831	1237
A	G	C	41	17	0.413793	1238
T	G	C	40	17	0.403509	1239
T	G	C	40	16	0.428571	1240
C	G	C	40	17	0.403509	1241
C	G	C	39	18	0.368421	1242
G	G	C	40	17	0.403509	1243
A	G	C	40	16	0.428571	1244
G	G	C	41	15	0.464286	1245
G	G	C	42	15	0.473684	1246
T	G	C	42	15	0.473684	1247
A	G	C	42	15	0.473684	1248
T	G	C	41	15	0.464286	1249
C	G	C	40	16	0.428571	1250
C	G	C	40	17	0.403509	1251
T	G	C	40	17	0.403509	1252
G	G	C	41	16	0.438596	1253
A	G	C	40	16	0.428571	1254
G	G	C	40	16	0.428571	1255
G	G	C	41	16	0.438596	1256
G	G	C	41	16	0.438596	1257
T	G	C	40	16	0.428571	1258
G	G	C	40	16	0.428571	1259
C	G	C	40	17	0.403509	1260
A	G	C	40	17	0.403509	1261
A	G	C	40	17	0.403509	1262
A	G	C	40	17	0.403509	1263
C	G	C	40	18	0.37931	1264
T	G	C	40	18	0.37931	1265
G	G	C	41	18	0.389831	1266
C	G	C	40	19	0.355932	1267
A	G	C	40	18	0.37931	1268
C	G	C	39	19	0.344828	1269
A	G	C	39	19	0.344828	1270
A	G	C	39	19	0.344828	1271
G	G	C	40	19	0.355932	1272
G	G	C	41	18	0.389831	1273
G	G	C	42	17	0.423729	1274
G	G	C	42	17	0.423729	1275
A	G	C	41	17	0.413793	1276
G	G	C	42	17	0.423729	1277
G	G	C	43	17	0.433333	1278
A	G	C	42	17	0.423729	1279
T	G	C	41	17	0.413793	1280
T	G	C	40	17	0.403509	1281
C	G	C	40	17	0.403509	1282
G	G	C	41	17	0.413793	1283
A	G	C	40	17	0.403509	1284
A	G	C	40	17	0.403509	1285
G	G	C	40	17	0.403509	1286
G	G	C	41	17	0.413793	1287
G	G	C	42	17	0.423729	1288
T	G	C	42	17	0.423729	1289
T	G	C	42	16	0.448276	1290
C	G	C	42	17	0.423729	1291
T	G	C	41	17	0.413793	1292
G	G	C	41	17	0.413793	1293
T	G	C	41	17	0.413793	1294
G	G	C	42	17	0.423729	1295
A	G	C	42	17	0.423729	1296
T	G	C	42	17	0.423729	1297
C	G	C	41	18	0.389831	1298
A	G	C	41	17	0.413793	1299
G	G	C	42	16	0.448276	1300
G	G	C	43	16	0.457627	1301
G	G	C	44	16	0.466667	1302
C	G	C	43	17	0.433333	1303
C	G	C	43	18	0.409836	1304
A	G	C	43	18	0.409836	1305
A	G	C	42	18	0.4	1306
C	G	C	42	18	0.4	1307
G	G	C	42	18	0.4	1308
C	G	C	42	18	0.4	1309
T	G	C	41	18	0.389831	1310
C	G	C	41	19	0.366667	1311
A	G	C	40	19	0.355932	1312
A	G	C	39	19	0.344828	1313
A	G	C	38	19	0.333333	1314
A	G	C	37	19	0.321429	1315
G	G	C	38	19	0.333333	1316
T	G	C	37	19	0.321429	1317
G	G	C	37	19	0.321429	1318
C	G	C	36	20	0.285714	1319
C	G	C	35	21	0.25	1320
A	G	C	35	21	0.25	1321
T	G	C	35	21	0.25	1322
G	G	C	35	21	0.25	1323
T	G	C	35	21	0.25	1324
T	G	C	34	21	0.236364	1325
A	G	C	34	21	0.236364	1326
C	G	C	34	21	0.236364	1327
A	G	C	33	21	0.222222	1328
G	G	C	33	21	0.222222	1329
G	G	C	34	20	0.259259	1330
A	G	C	34	20	0.259259	1331
G	G	C	35	19	0.296296	1332
A	G	C	34	19	0.283019	1333
G	G	C	34	19	0.283019	1334
A	G	C	34	19	0.283019	1335
T	G	C	33	19	0.269231	1336
G	G	C	33	19	0.269231	1337
A	G	C	33	19	0.269231	1338
A	G	C	33	19	0.269231	1339
C	G	C	33	20	0.245283	1340
T	G	C	33	19	0.269231	1341
C	G	C	33	19	0.269231	1342
A	G	C	32	19	0.254902	1343
A	G	C	32	19	0.254902	1344
A	G	C	31	19	0.24	1345
A	G	C	30	19	0.22449	1346
G	G	C	31	19	0.24	1347
T	G	C	31	19	0.24	1348
G	G	C	32	19	0.254902	1349
C	G	C	32	19	0.254902	1350
C	G	C	32	19	0.254902	1351
A	G	C	32	19	0.254902	1352
C	G	C	31	20	0.215686	1353
G	G	C	32	20	0.230769	1354
T	G	C	31	20	0.215686	1355
T	G	C	30	20	0.2	1356
G	G	C	30	20	0.2	1357
C	G	C	30	21	0.176471	1358
A	G	C	29	21	0.16	1359
A	G	C	29	20	0.183673	1360
G	G	C	30	20	0.2	1361
A	G	C	30	20	0.2	1362
G	G	C	31	20	0.215686	1363
A	G	C	31	19	0.24	1364
G	G	C	32	19	0.254902	1365
G	G	C	32	19	0.254902	1366
C	G	C	32	19	0.254902	1367
A	G	C	32	19	0.254902	1368
A	G	C	32	18	0.28	1369
G	G	C	33	18	0.294118	1370
C	G	C	33	19	0.269231	1371
T	G	C	32	19	0.254902	1372
C	G	C	31	20	0.215686	1373

## Sheet: Sheet4
G	G	C	24	30	-0.111111	100
C	G	C	24	30	-0.111111	101
T	G	C	23	30	-0.132075	102
A	G	C	23	30	-0.132075	103
G	G	C	23	30	-0.132075	104
G	G	C	23	30	-0.132075	105
G	G	C	24	29	-0.0943396	106
T	G	C	24	29	-0.0943396	107
T	G	C	24	29	-0.0943396	108
C	G	C	24	29	-0.0943396	109
C	G	C	24	30	-0.111111	110
C	G	C	24	31	-0.127273	111
C	G	C	24	31	-0.127273	112
G	G	C	25	31	-0.107143	113
C	G	C	25	32	-0.122807	114
G	G	C	26	32	-0.103448	115
T	G	C	26	32	-0.103448	116
G	G	C	27	32	-0.0847458	117
A	G	C	27	32	-0.0847458	118
A	G	C	27	32	-0.0847458	119
G	G	C	28	31	-0.0508475	120
C	G	C	28	32	-0.0666667	121
G	G	C	29	32	-0.0491803	122
C	G	C	29	33	-0.0645161	123
G	G	C	30	32	-0.0322581	124
G	G	C	31	31	0	125
C	G	C	31	31	0	126
A	G	C	31	31	0	127
A	G	C	31	30	0.0163934	128
T	G	C	31	29	0.0333333	129
G	G	C	32	29	0.0491803	130
C	G	C	32	30	0.0322581	131
G	G	C	32	30	0.0322581	132
A	G	C	32	29	0.0491803	133
G	G	C	33	29	0.0645161	134
G	G	C	34	28	0.0967742	135
G	G	C	35	28	0.111111	136
G	G	C	36	28	0.125	137
A	G	C	35	28	0.111111	138
G	G	C	36	27	0.142857	139
G	G	C	36	27	0.142857	140
A	G	C	35	27	0.129032	141
T	G	C	34	27	0.114754	142
T	G	C	34	26	0.133333	143
C	G	C	34	27	0.114754	144
T	G	C	33	27	0.1	145
G	G	C	34	26	0.133333	146
C	G	C	34	27	0.114754	147
A	G	C	34	27	0.114754	148
G	G	C	34	27	0.114754	149
A	G	C	34	27	0.114754	150
T	G	C	34	27	0.114754	151
G	G	C	34	27	0.114754	152
A	G	C	34	26	0.133333	153
G	G	C	35	26	0.147541	154
G	G	C	36	25	0.180328	155
G	G	C	37	25	0.193548	156
T	G	C	36	25	0.180328	157
A	G	C	36	24	0.2	158
G	G	C	37	24	0.213115	159
G	G	C	38	23	0.245902	160
A	G	C	38	22	0.266667	161
T	G	C	37	22	0.254237	162
T	G	C	37	21	0.275862	163
C	G	C	37	21	0.275862	164
C	G	C	37	22	0.254237	165
G	G	C	37	22	0.254237	166
T	G	C	37	22	0.254237	167
T	G	C	37	22	0.254237	168
G	G	C	38	22	0.266667	169
C	G	C	38	22	0.266667	170
A	G	C	38	21	0.288136	171
A	G	C	38	21	0.288136	172
G	G	C	39	20	0.322034	173
G	G	C	39	20	0.322034	174
G	G	C	40	19	0.355932	175
G	G	C	41	19	0.366667	176
A	G	C	40	19	0.355932	177
G	G	C	41	19	0.366667	178
G	G	C	42	18	0.4	179
A	G	C	42	18	0.4	180
T	G	C	42	18	0.4	181
T	G	C	42	17	0.423729	182
C	G	C	42	17	0.423729	183
C	G	C	42	18	0.4	184
A	G	C	41	18	0.389831	185
C	G	C	40	19	0.355932	186
G	G	C	40	19	0.355932	187
C	G	C	39	20	0.322034	188
G	G	C	40	20	0.333333	189
T	G	C	40	20	0.333333	190
T	G	C	40	19	0.355932	191
A	G	C	40	19	0.355932	192
G	G	C	40	19	0.355932	193
A	G	C	40	19	0.355932	194
G	G	C	40	19	0.355932	195
G	G	C	40	19	0.355932	196
A	G	C	40	19	0.355932	197
T	G	C	40	19	0.355932	198
T	G	C	40	19	0.355932	199
C	G	C	39	20	0.322034	200
C	G	C	39	20	0.322034	201
G	G	C	40	20	0.333333	202
C	G	C	40	21	0.311475	203
A	G	C	39	21	0.3	204
A	G	C	38	21	0.288136	205
A	G	C	37	21	0.275862	206
G	G	C	38	21	0.288136	207
G	G	C	39	21	0.3	208
A	G	C	39	20	0.322034	209
A	G	C	39	19	0.344828	210
G	G	C	40	18	0.37931	211
G	G	C	41	17	0.413793	212
G	G	C	41	17	0.413793	213
T	G	C	41	16	0.438596	214
T	G	C	40	16	0.428571	215
C	G	C	40	17	0.403509	216
C	G	C	39	18	0.368421	217
A	G	C	39	18	0.368421	218
C	G	C	39	19	0.344828	219
A	G	C	38	19	0.333333	220
G	G	C	39	18	0.368421	221
G	G	C	39	18	0.368421	222
A	G	C	39	17	0.392857	223
G	G	C	39	17	0.392857	224
G	G	C	39	17	0.392857	225
G	G	C	40	16	0.428571	226
A	G	C	40	16	0.428571	227
A	G	C	40	16	0.428571	228
G	G	C	41	16	0.438596	229
G	G	C	41	16	0.438596	230
G	G	C	42	15	0.473684	231
C	G	C	41	16	0.438596	232
T	G	C	41	16	0.438596	233
C	G	C	40	17	0.403509	234
T	G	C	39	17	0.392857	235
A	G	C	38	17	0.381818	236
C	G	C	37	18	0.345455	237
G	G	C	38	18	0.357143	238
C	G	C	37	19	0.321429	239
G	G	C	37	19	0.321429	240
A	G	C	37	19	0.321429	241
G	G	C	38	19	0.333333	242
G	G	C	39	19	0.344828	243
T	G	C	39	18	0.368421	244
G	G	C	40	18	0.37931	245
A	G	C	39	18	0.368421	246
G	G	C	40	17	0.403509	247
G	G	C	41	17	0.413793	248
G	G	C	41	17	0.413793	249
T	G	C	41	17	0.413793	250
T	G	C	41	17	0.413793	251
C	G	C	40	18	0.37931	252
C	G	C	40	19	0.355932	253
A	G	C	39	19	0.344828	254
C	G	C	38	20	0.310345	255
T	G	C	37	20	0.298246	256
G	G	C	38	20	0.310345	257
A	G	C	38	20	0.310345	258
T	G	C	37	20	0.298246	259
C	G	C	36	21	0.263158	260
C	G	C	36	22	0.241379	261
G	G	C	37	22	0.254237	262
G	G	C	38	22	0.266667	263
C	G	C	38	22	0.266667	264
A	G	C	38	21	0.288136	265
G	G	C	38	21	0.288136	266
C	G	C	38	22	0.266667	267
T	G	C	38	22	0.266667	268
C	G	C	37	23	0.233333	269
G	G	C	38	22	0.266667	270
