# Supplementary material for: The interplay of RNA:DNA hybrid structure and G-quadruplexes determines the outcome of R-loop-replisome collisions
Source: eLife journal article supplement (doi:10.7554/elife.72286), 2021-09-08
Supplement: supp [file elife-72286-supp-v1.zip]

# Figure 5 - source data 1

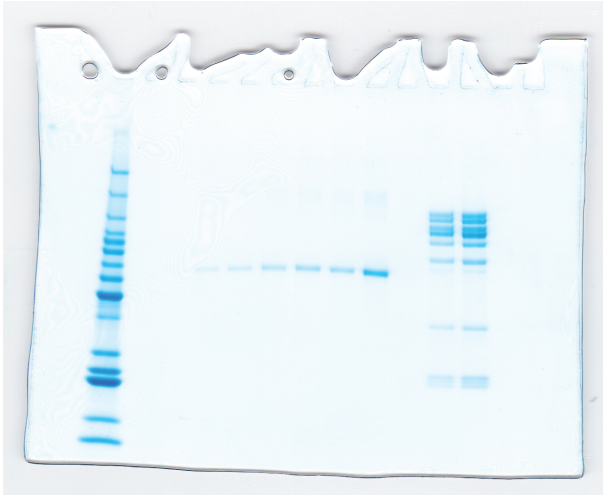

Figure 5A

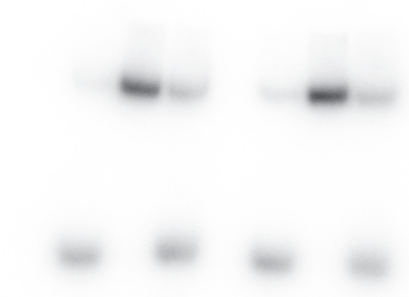

Figure 5B, i

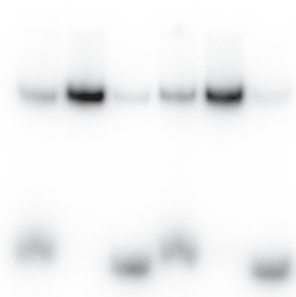

Figure 5B, ii

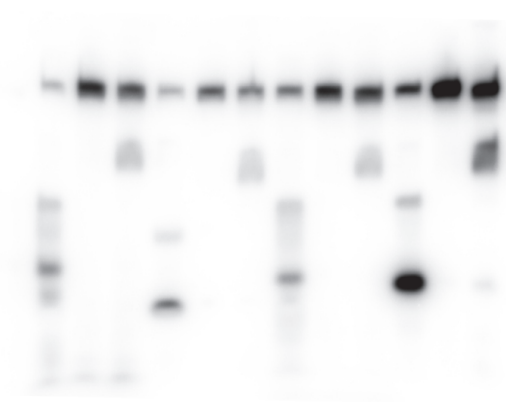

Figure 5B, iii+iv

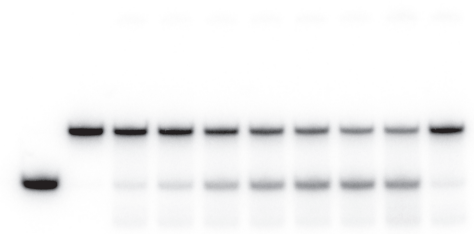

Figure 5C, DNA:DNA

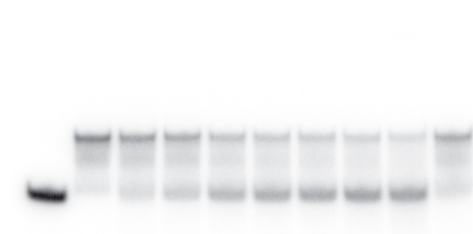

Figure 5C, RNA:DNA
