# Supplementary material for: The interplay of RNA:DNA hybrid structure and G-quadruplexes determines the outcome of R-loop-replisome collisions
Source: eLife journal article supplement (doi:10.7554/elife.72286), 2021-09-08
Supplement: supp [file elife-72286-supp-v1.zip]

## Figure 4 - source data 2

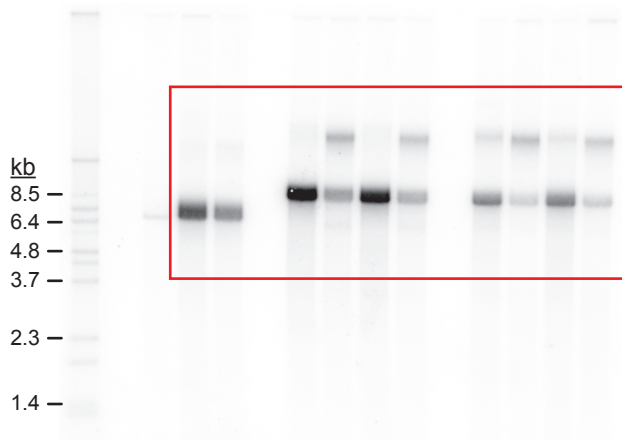

Figure 4D - native

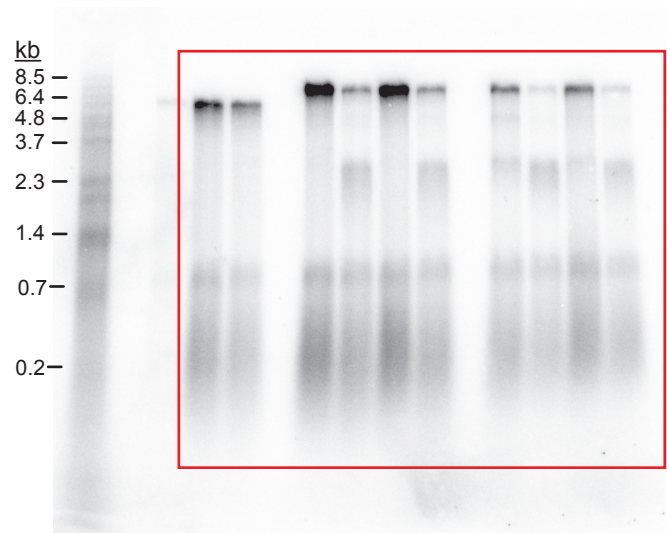

Figure 4D - denaturing

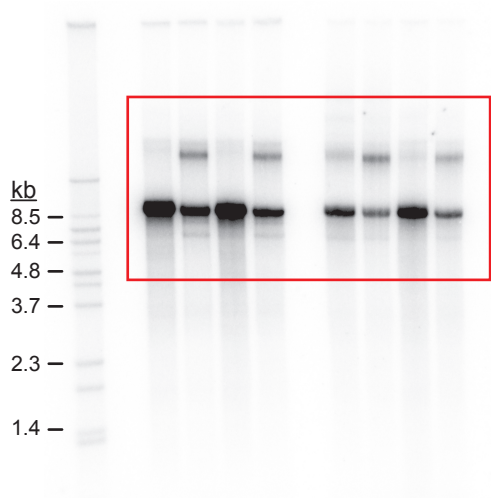

Figure 4E - lanes 1-8 - native

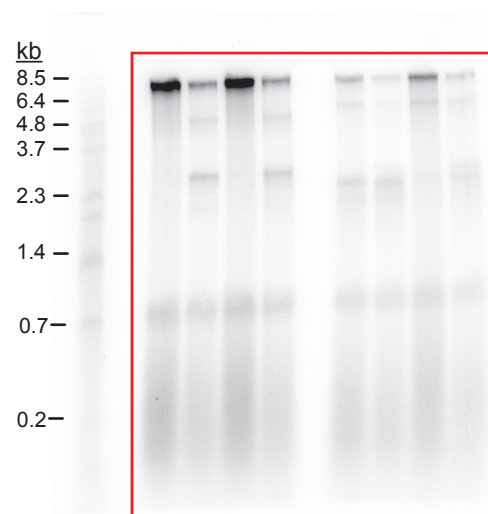

Figure 4E - lanes 1-8- denaturing

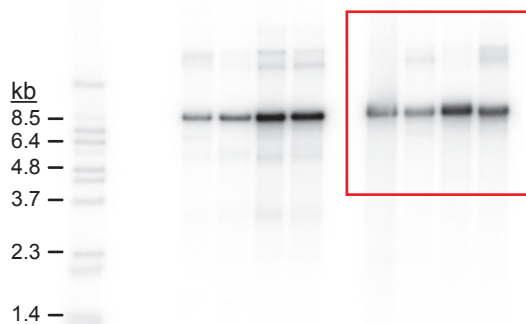

Figure 4E - lanes 9-12- native

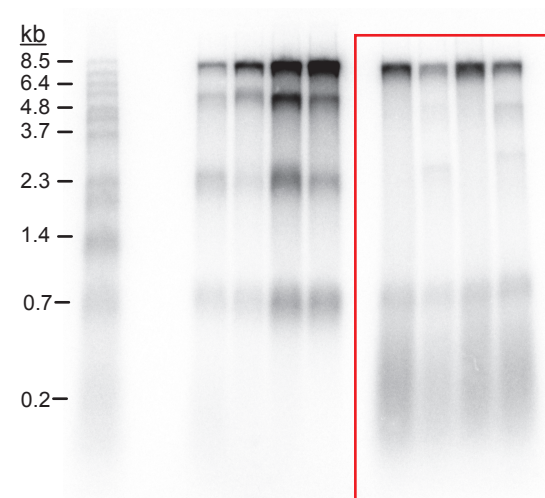

Figure 4E - lanes 9-12- denaturing
