# Supplementary material for: The interplay of RNA:DNA hybrid structure and G-quadruplexes determines the outcome of R-loop-replisome collisions
Source: eLife journal article supplement (doi:10.7554/elife.72286), 2021-09-08
Supplement: supp [file elife-72286-supp-v1.zip]

Figure 8 - source data 1

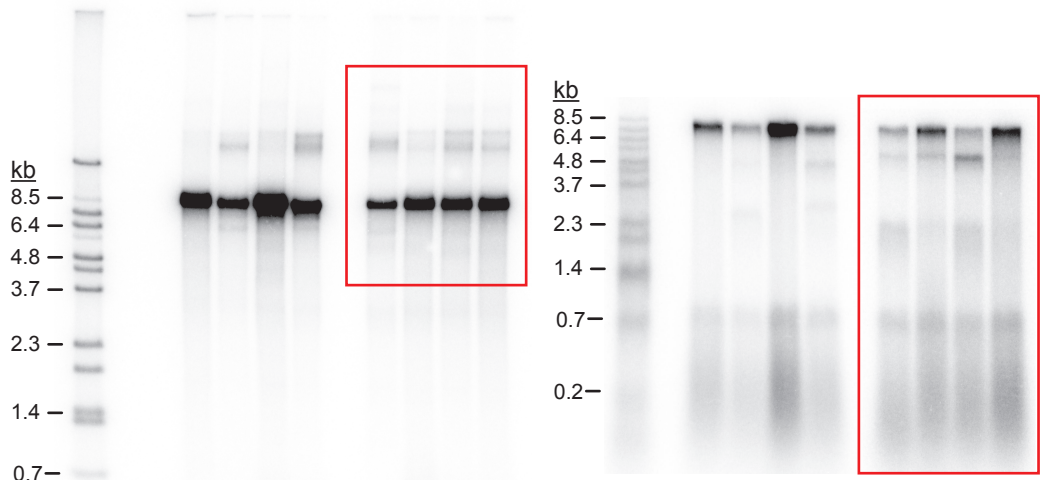

Figure 8A - native

Figure 8A - denaturing

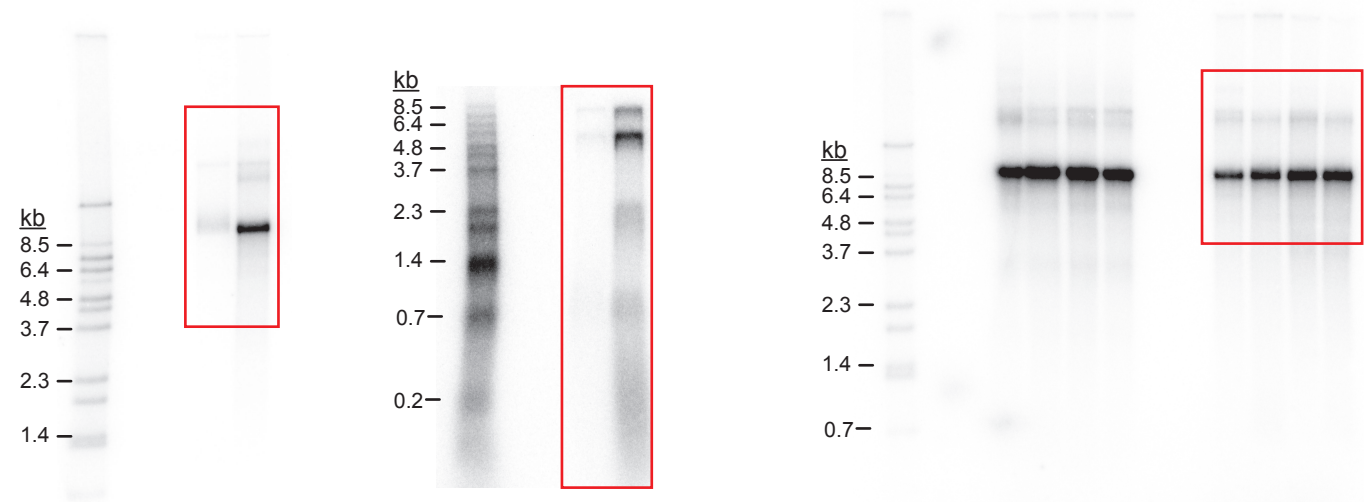

Figure 8B - native

Figure 8B - denaturing

Figure 8C - native

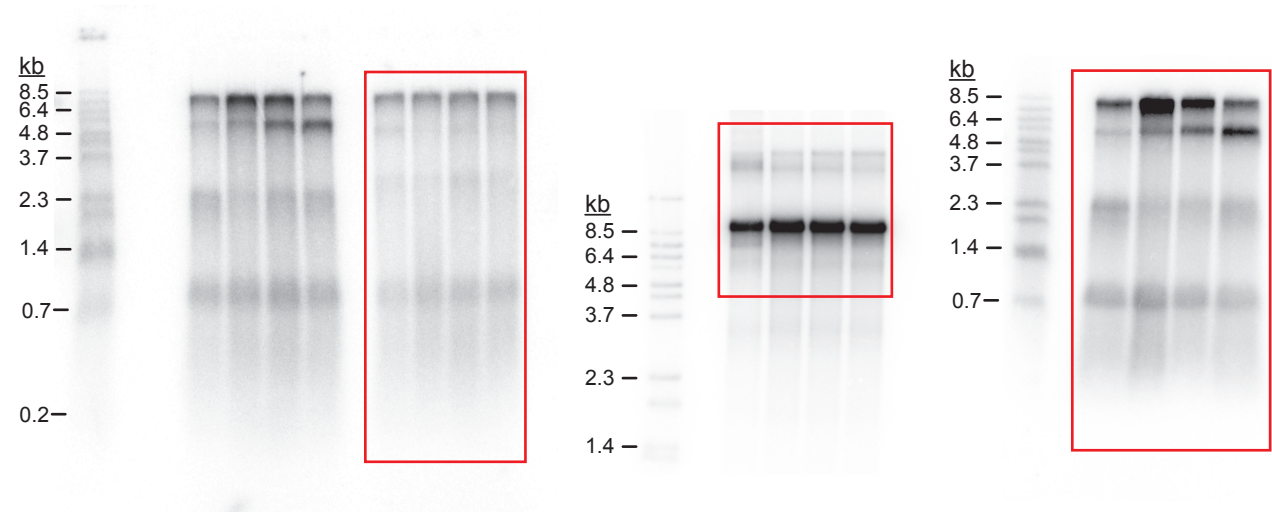

Figure 8C - denaturing

Figure 8E - native

Figure 8E - denaturing
