# Supplementary material for: The interplay of RNA:DNA hybrid structure and G-quadruplexes determines the outcome of R-loop-replisome collisions
Source: eLife journal article supplement (doi:10.7554/elife.72286), 2021-09-08
Supplement: supp [file elife-72286-supp-v1.zip]

# Figure 6 - source data 1

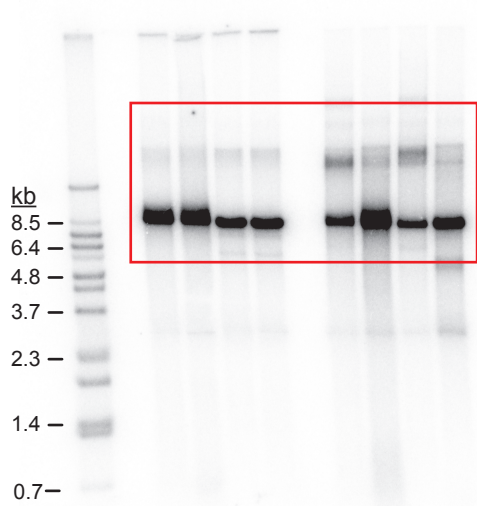

Figure 6A - native

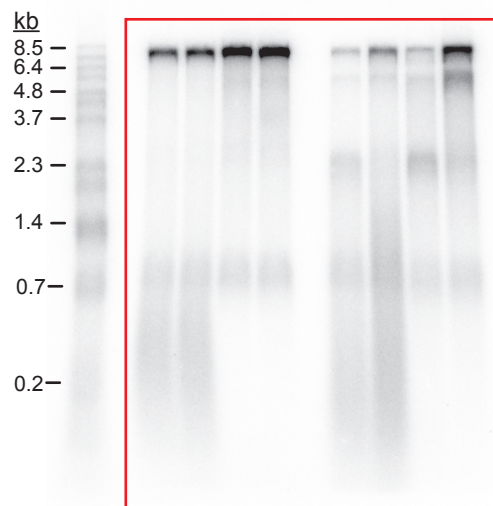

Figure 6A - denaturing

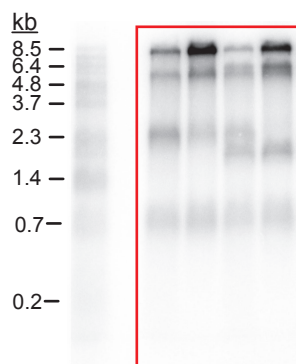

Figure 6C

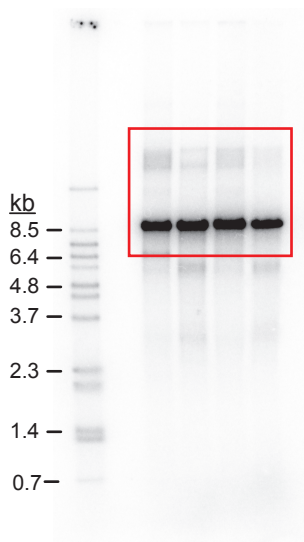

Figure 6D - native

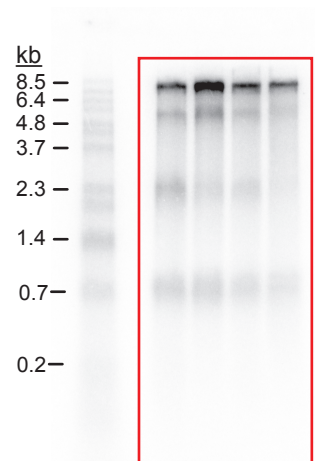

Figure 6D - denaturing
