# Supplementary material for: The interplay of RNA:DNA hybrid structure and G-quadruplexes determines the outcome of R-loop-replisome collisions
Source: eLife journal article supplement (doi:10.7554/elife.72286), 2021-09-08
Supplement: supp [file elife-72286-supp-v1.zip]

Figure 3 - source data 1

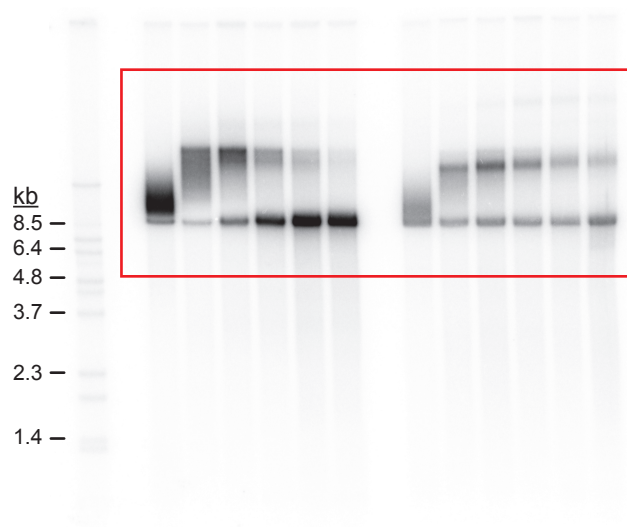

Figure 3  
CD, native

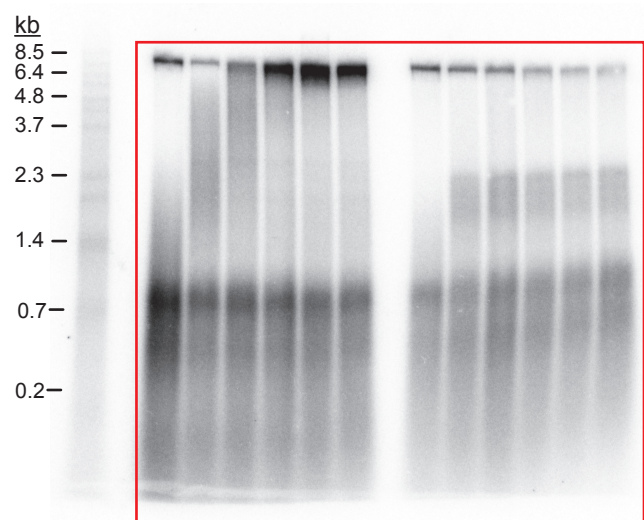

Figure 3  
CD, denaturing

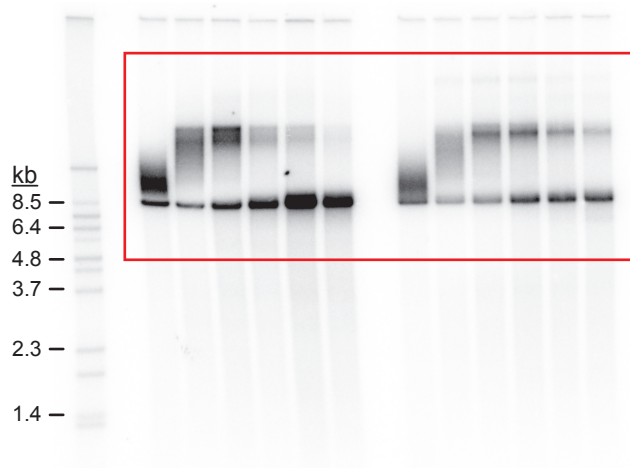

Figure 3  
HO, native

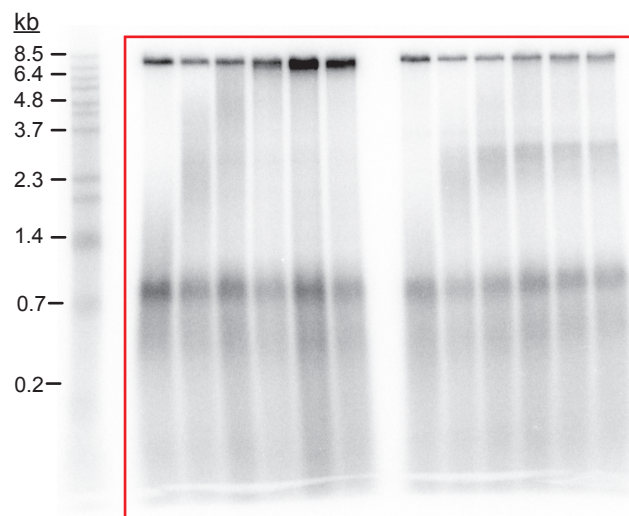

Figure 3  
HO, denaturing
