# Supplementary figures and images for: The interplay of RNA:DNA hybrid structure and G-quadruplexes determines the outcome of R-loop-replisome collisions
Source: eLife journal article supplement (doi:10.7554/elife.72286), 2021-09-08

Figure 1- figure supplement 1 - source data 2

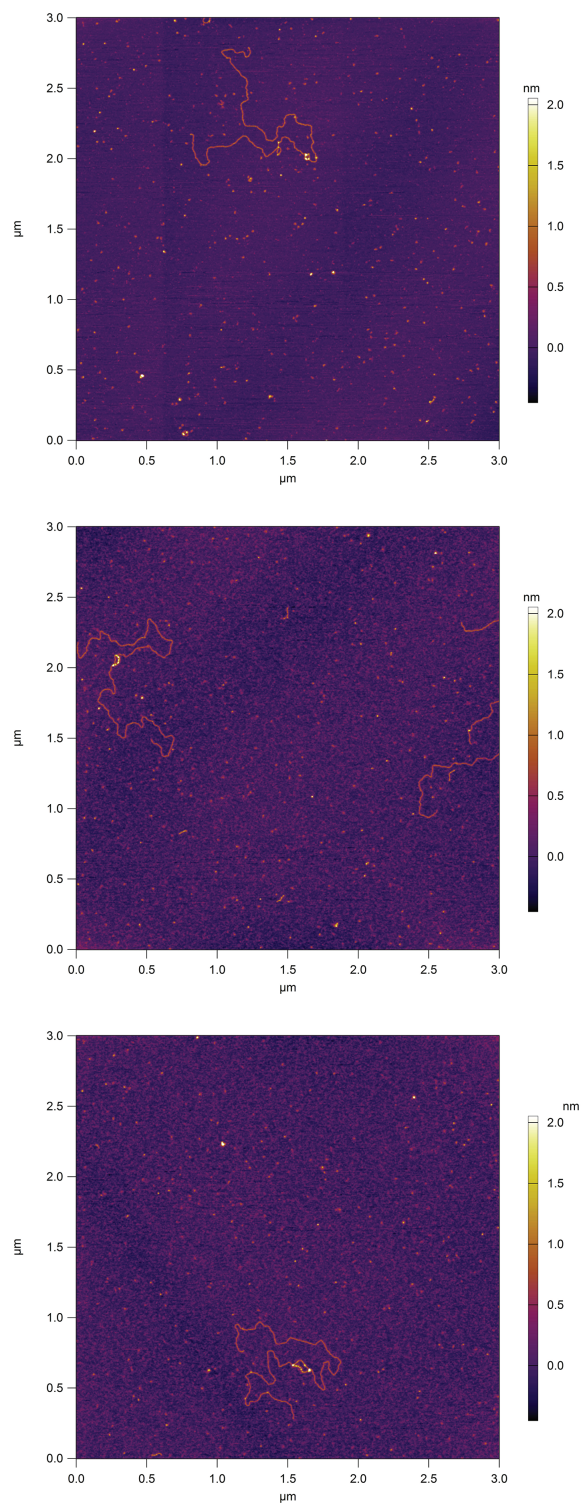

Figure 1 - figure supplement 1D

Supplement: supp [file elife-72286-supp-v1.zip]

Figure 8 - figure supplement 1

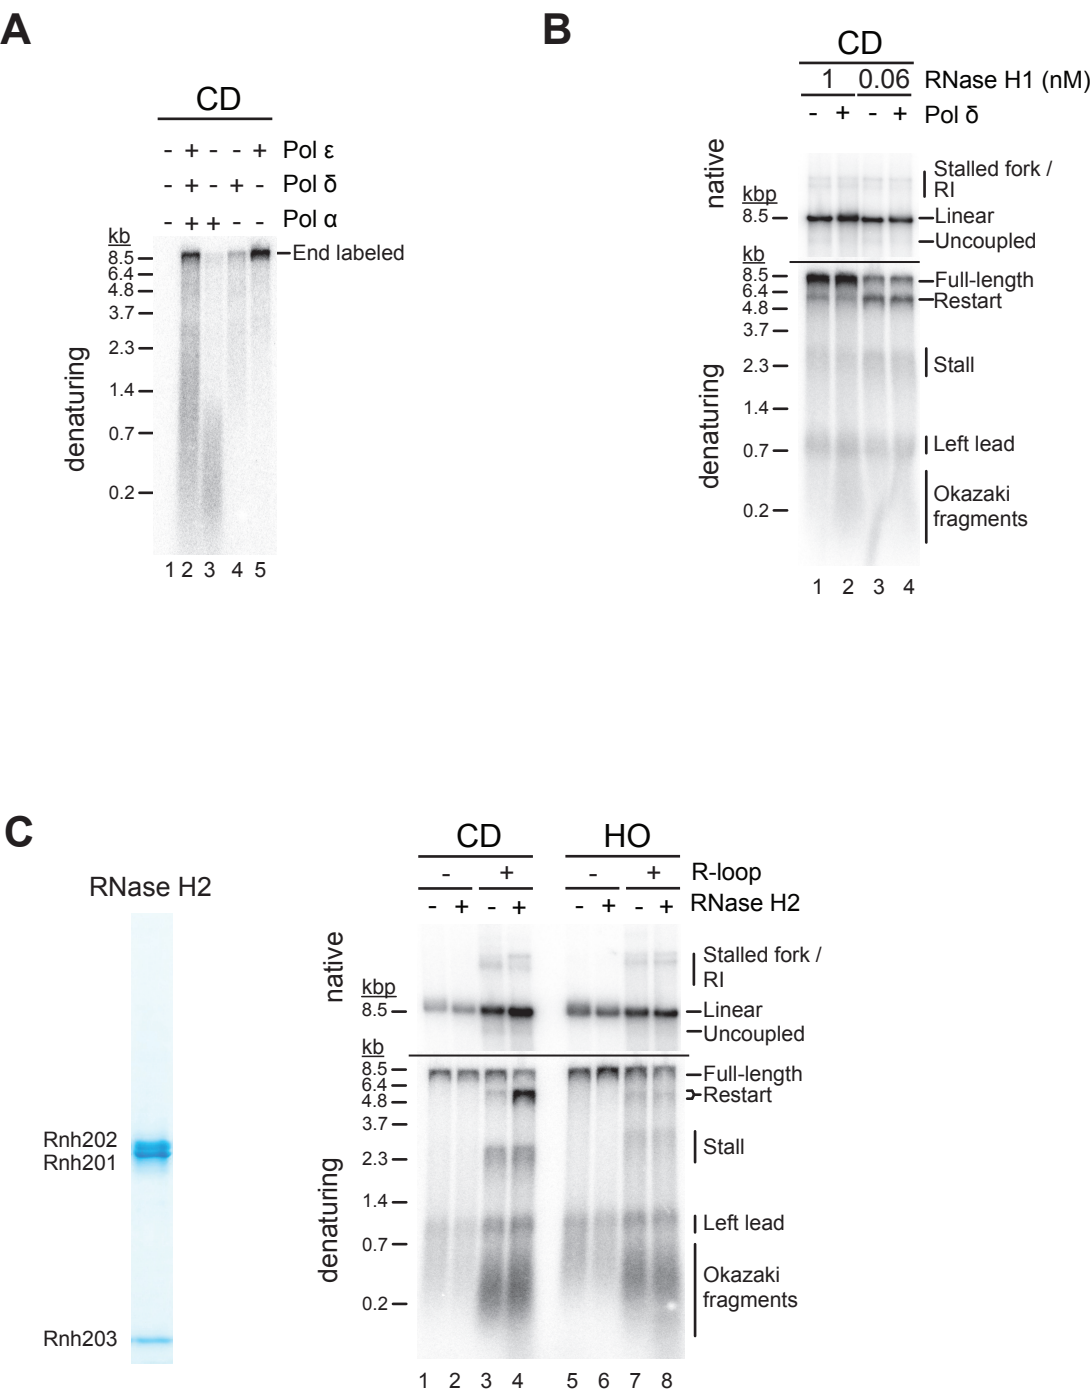

Supplement: supp [file elife-72286-supp-v1.zip]

**Figure 7 - figure supplement 1 - source data 1**

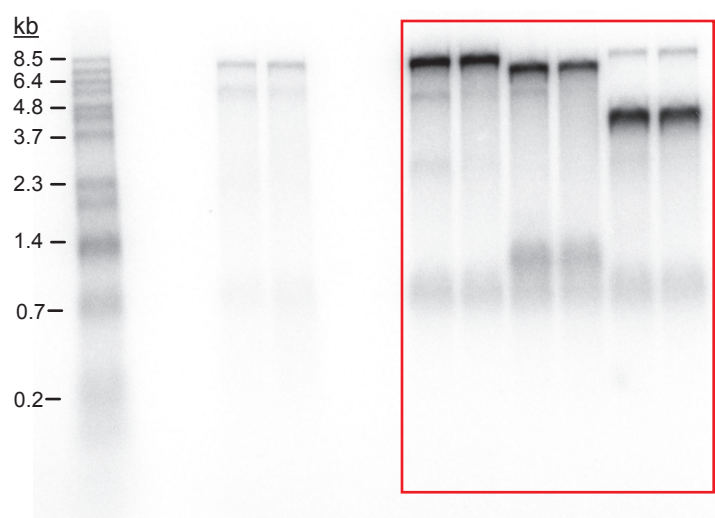

Figure 7 - figure supplement 1A

Supplement: supp [file elife-72286-supp-v1.zip]

## Figure 2 - source data 1

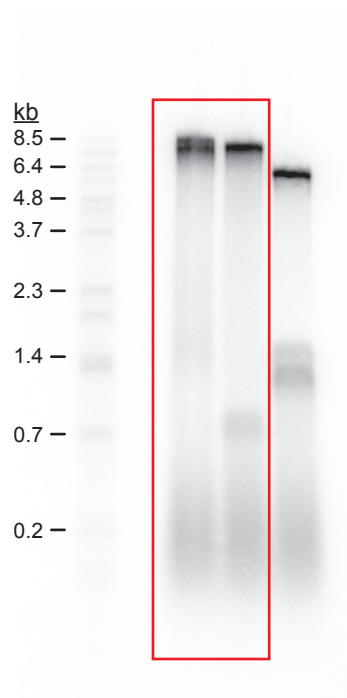

Figure 2B

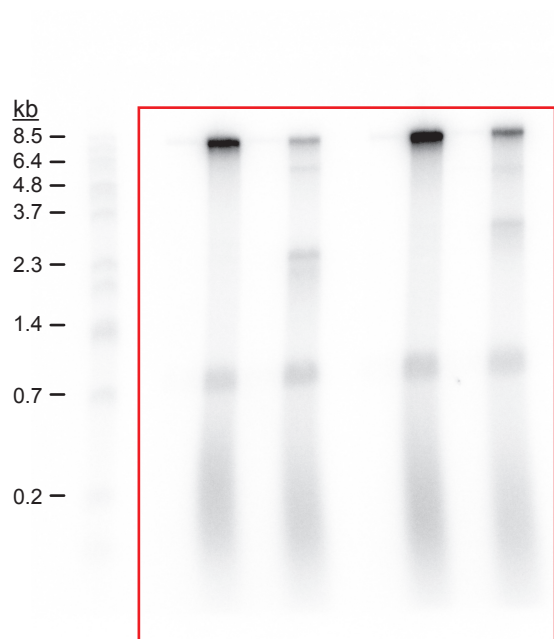

Figure 2C - denaturing

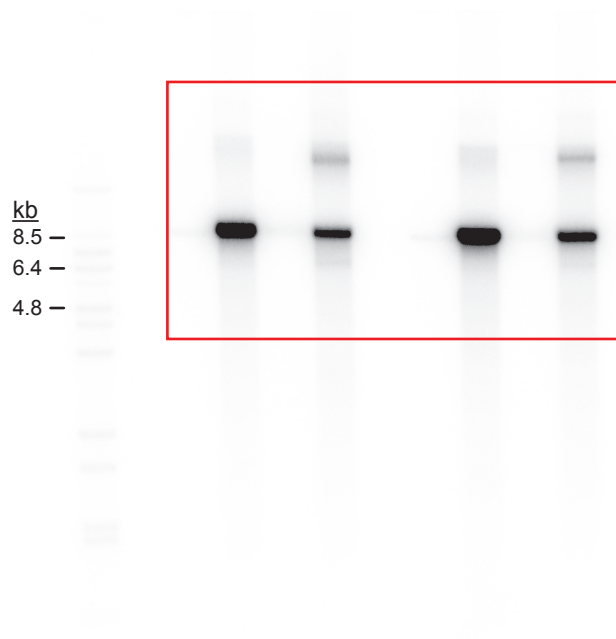

Figure 2C - native

Supplement: supp [file elife-72286-supp-v1.zip]

# Figure 1 - figure supplement 1

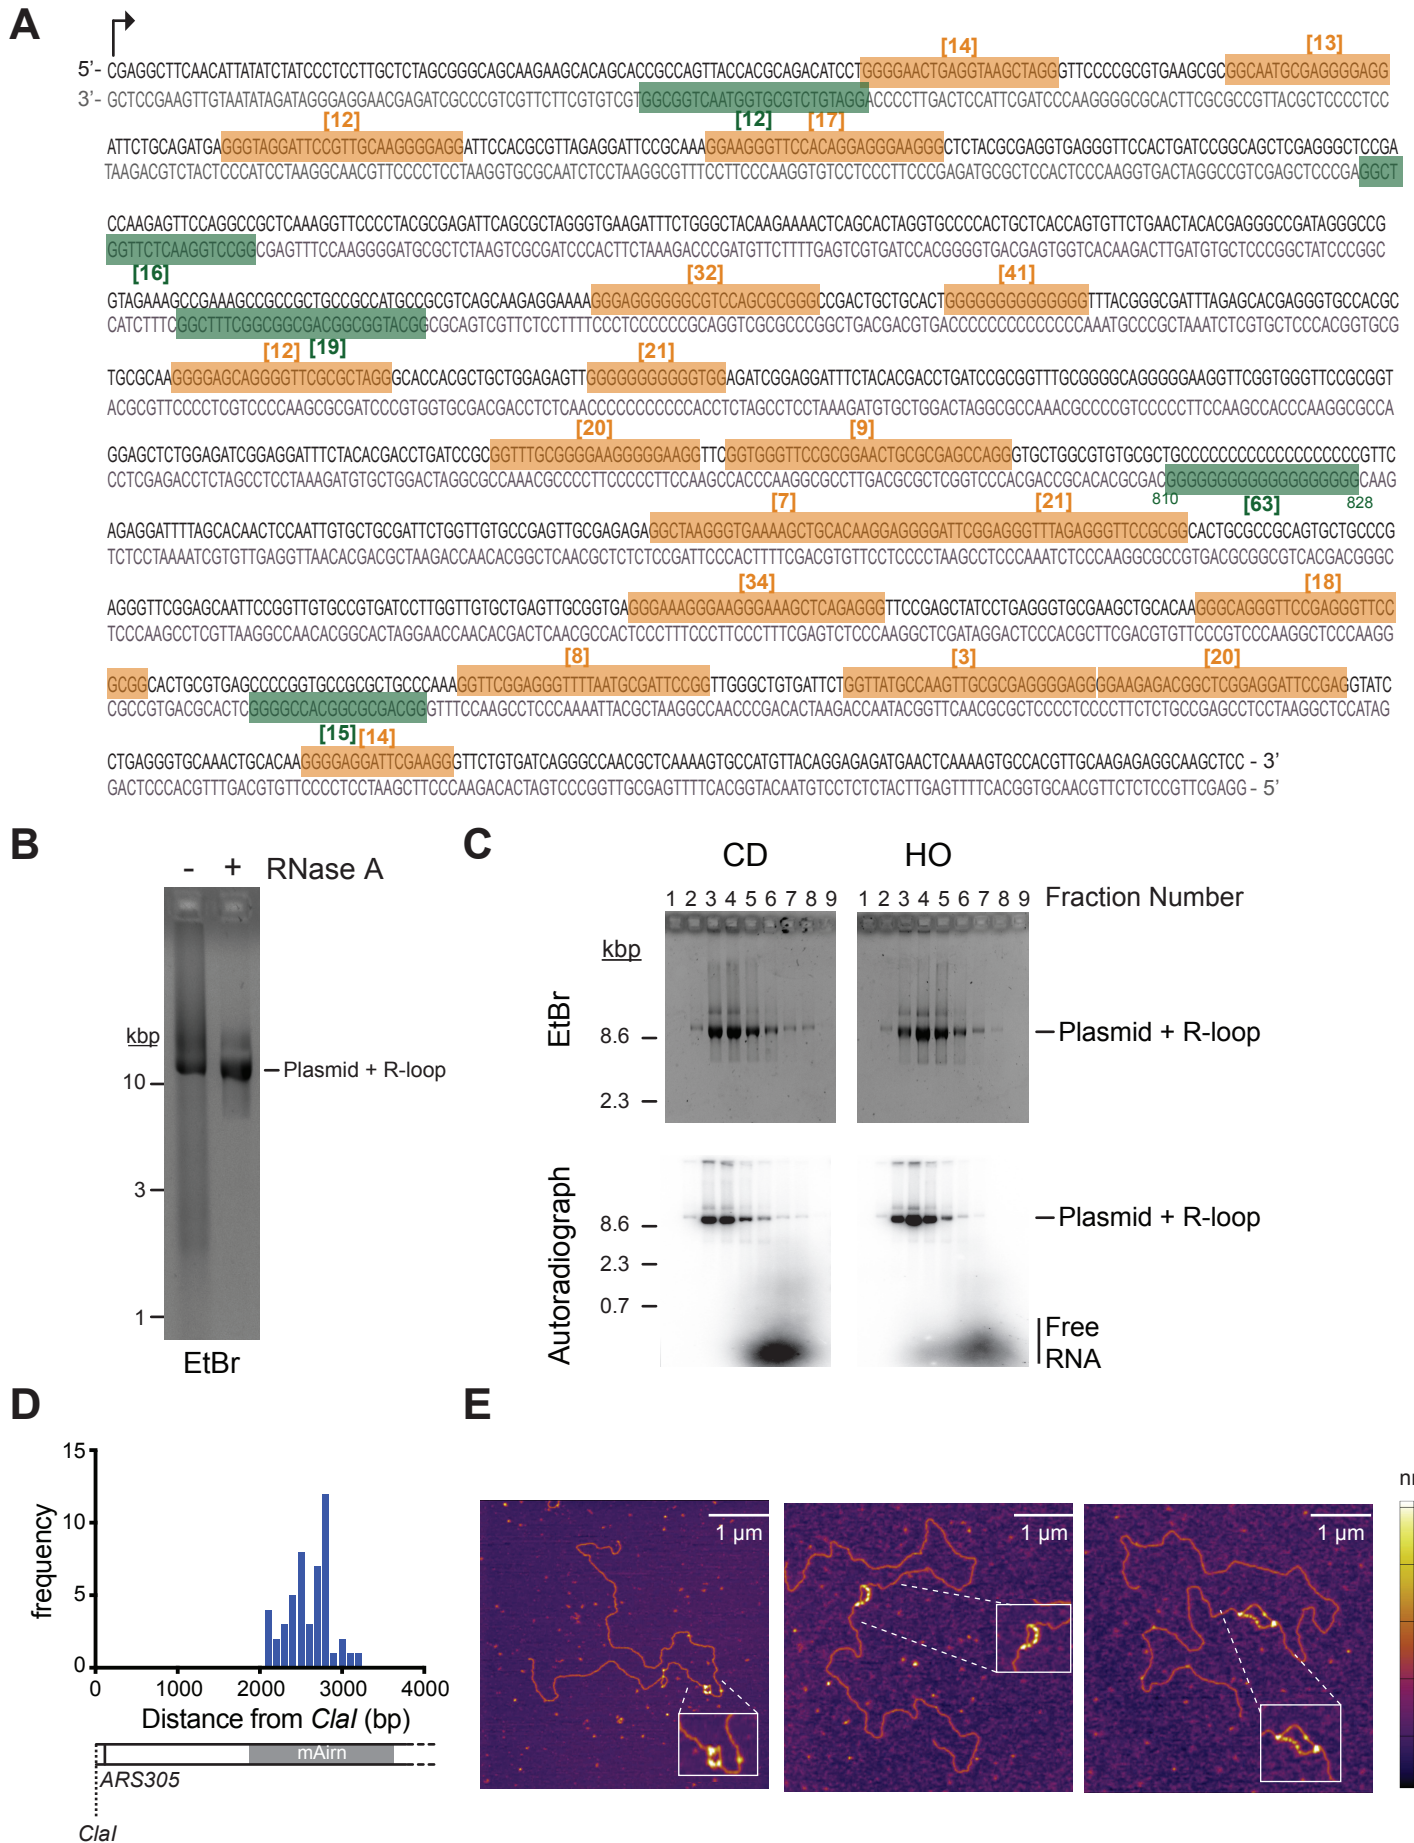

Supplement: supp [file elife-72286-supp-v1.zip]

Figure 2 - figure supplement 1

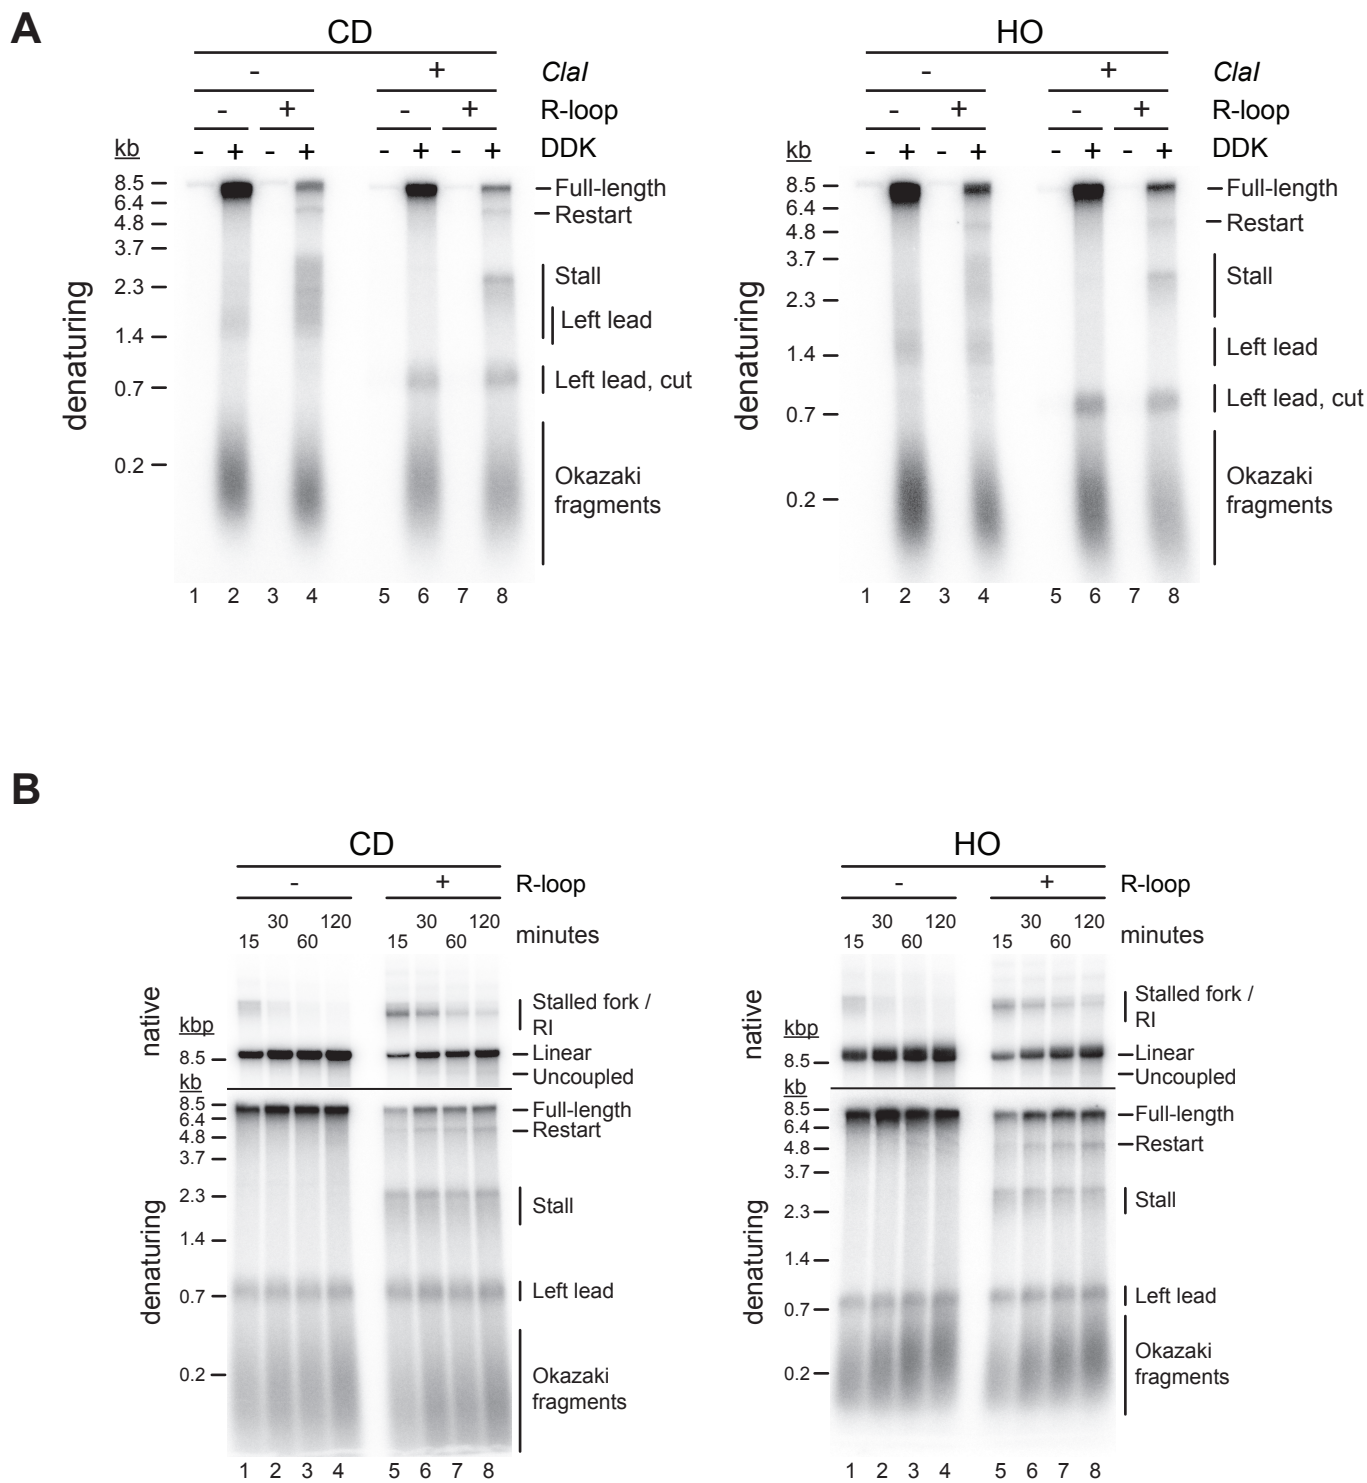

Supplement: supp [file elife-72286-supp-v1.zip]

Figure 4 - figure supplement 2

A

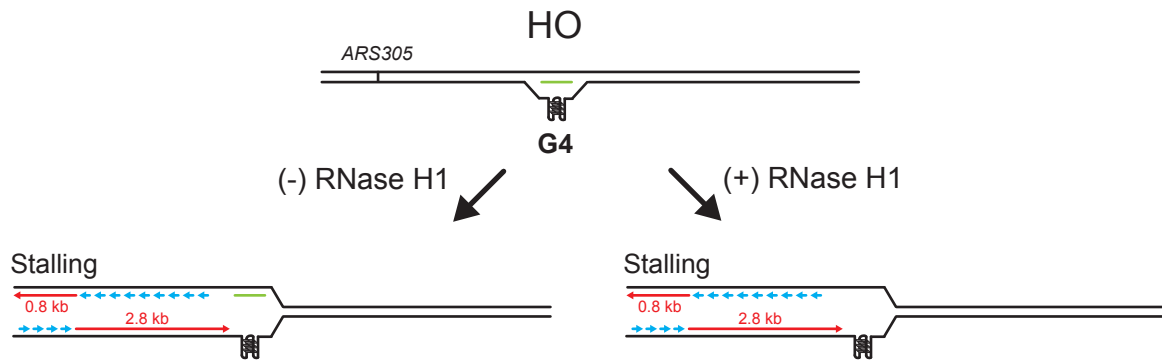

B

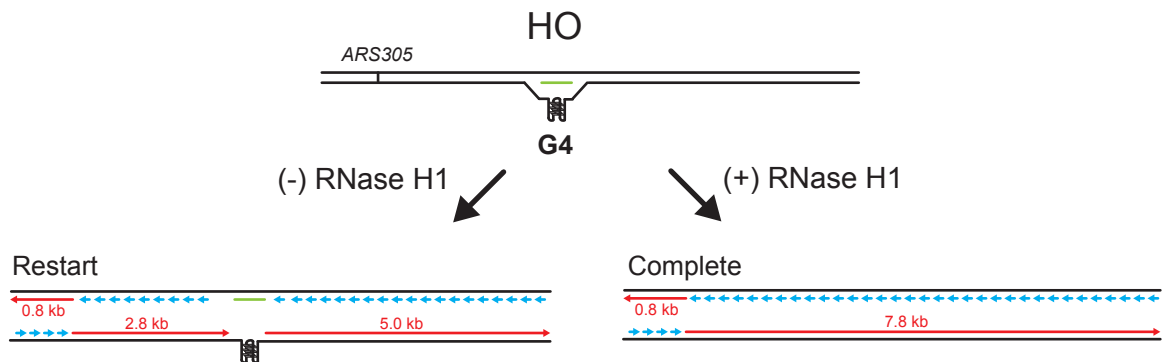

Supplement: supp [file elife-72286-supp-v1.zip]

Figure 2 - source data 2

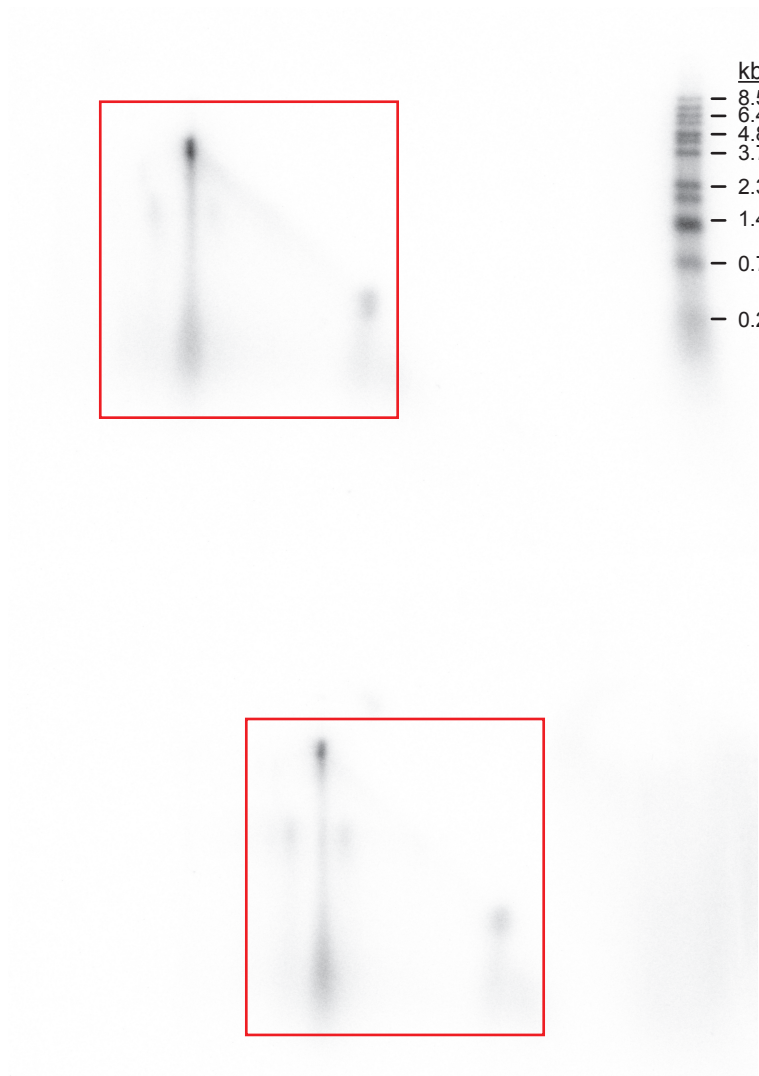

Figure 2E - 2nd dimension (alkaline)

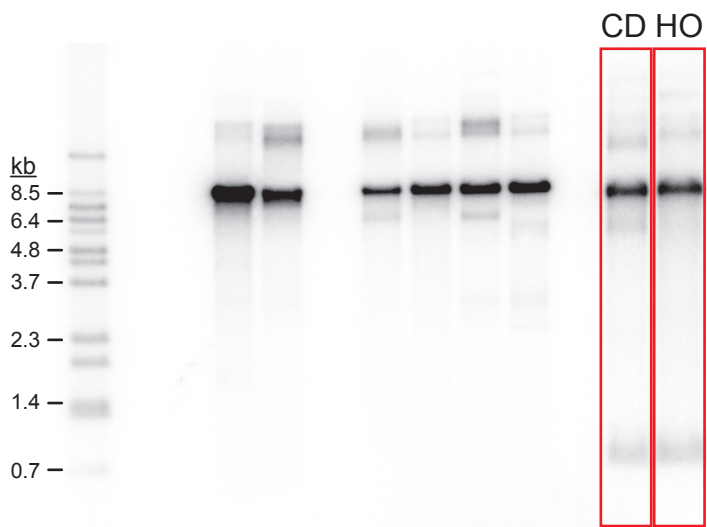

Figure 2E - 1st dimension (native)

Supplement: supp [file elife-72286-supp-v1.zip]

Figure 1 - source data 2

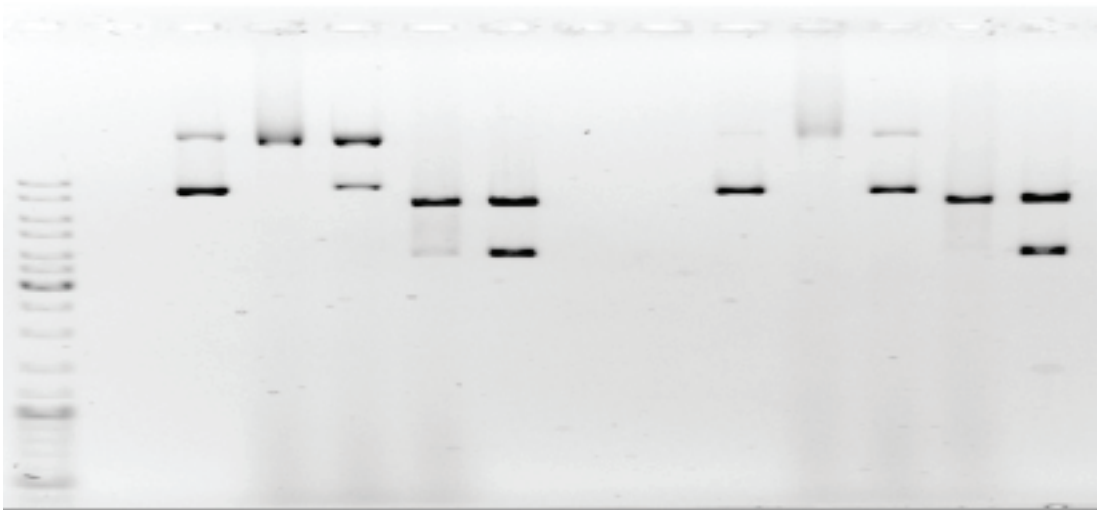

Figure 1D

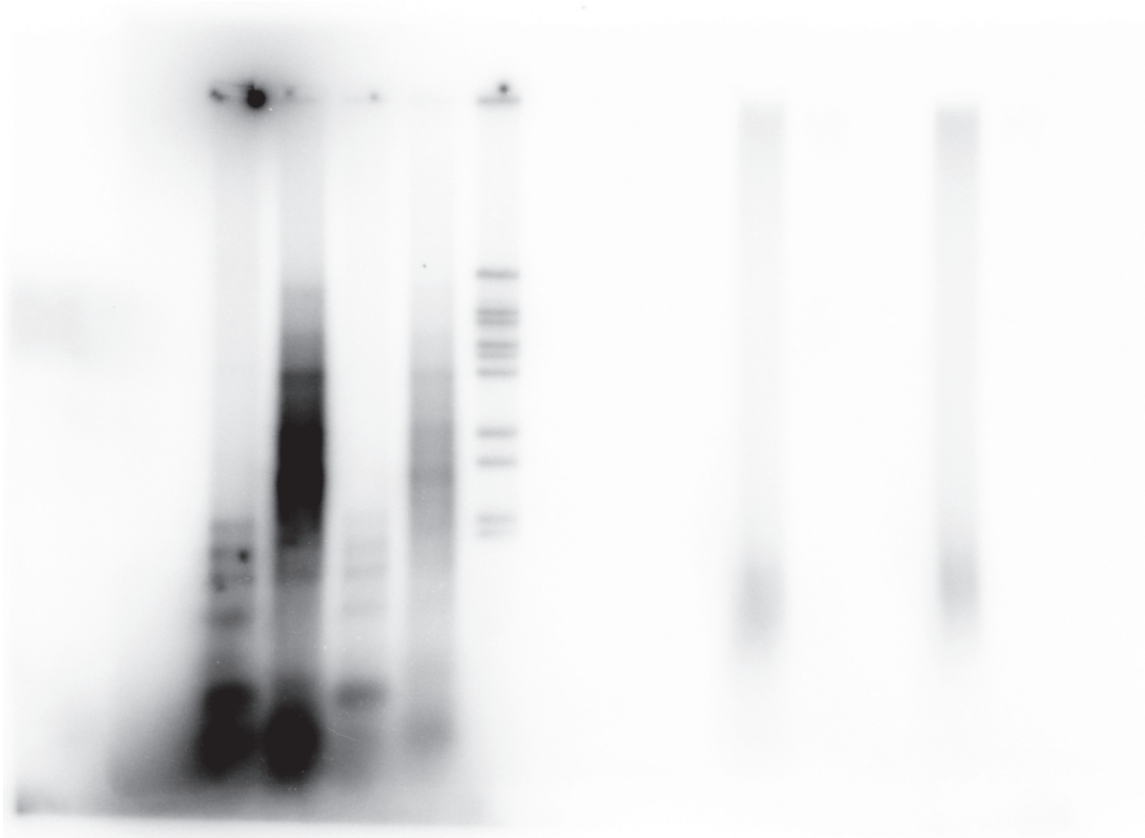

Figure 1E

Supplement: supp [file elife-72286-supp-v1.zip]

# Figure 2 - figure supplement 2

**A**

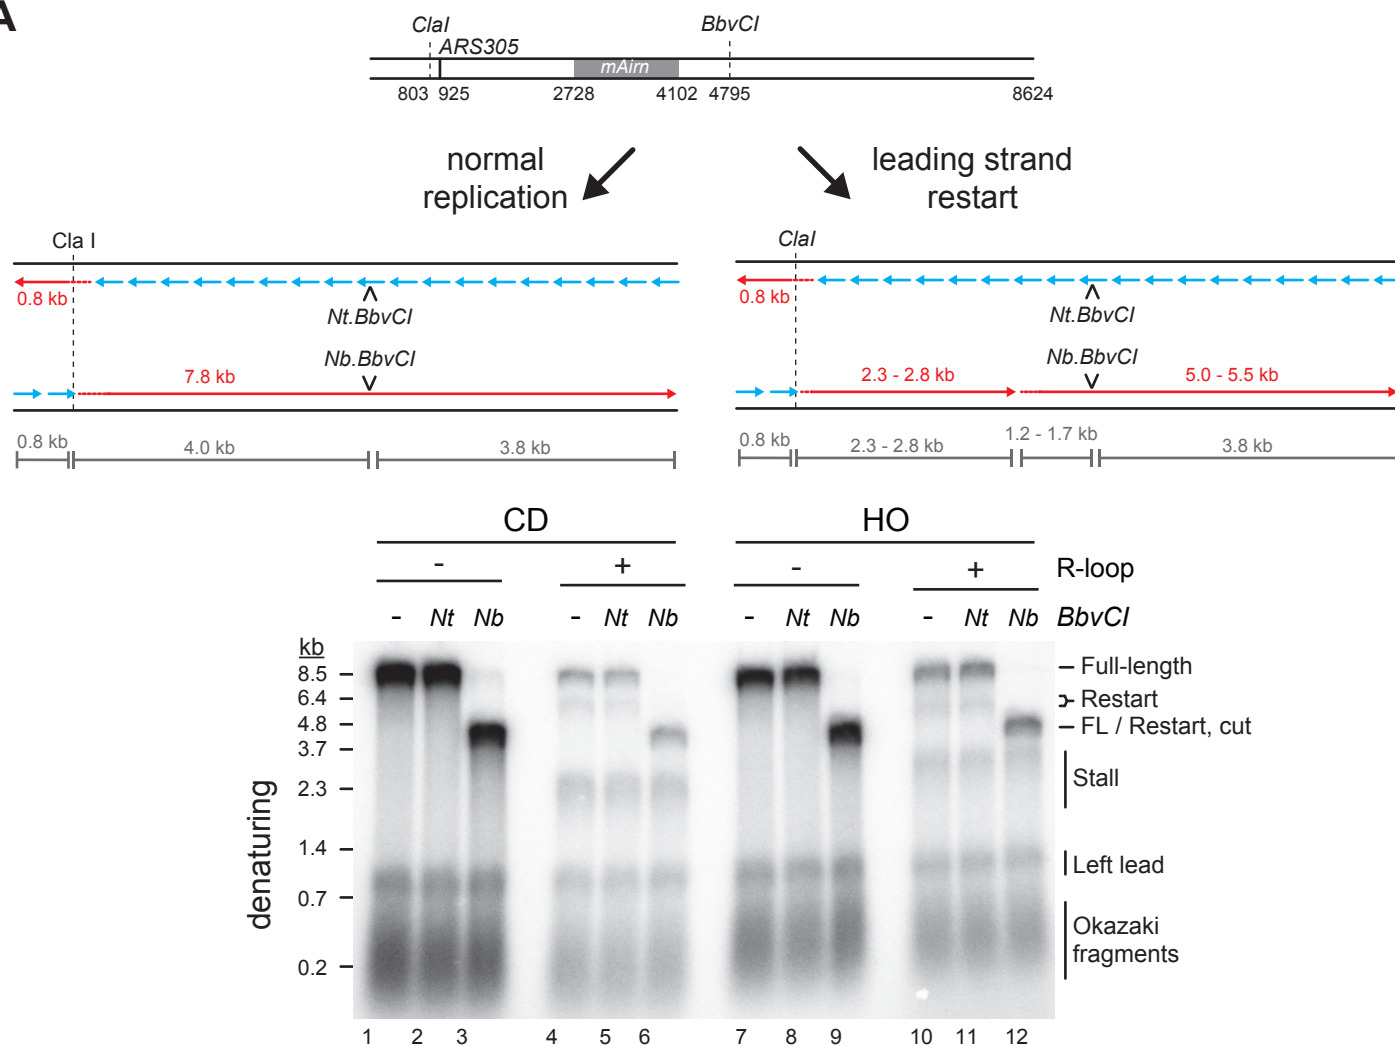

**B**

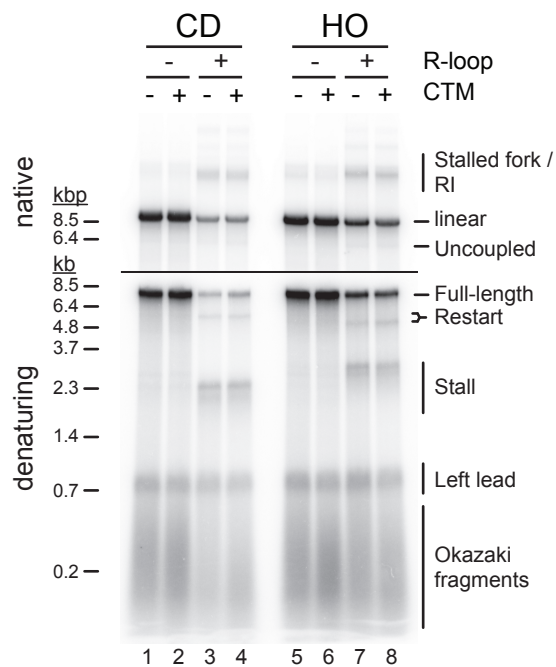

Supplement: supp [file elife-72286-supp-v1.zip]

Figure 5 - source data 2

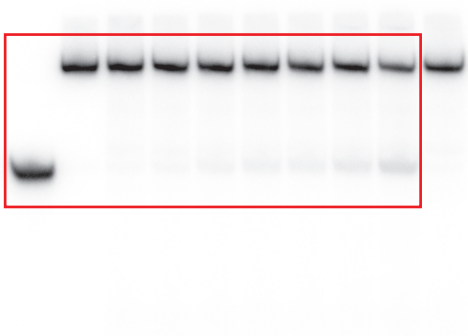

Figure 5D, G4-wt

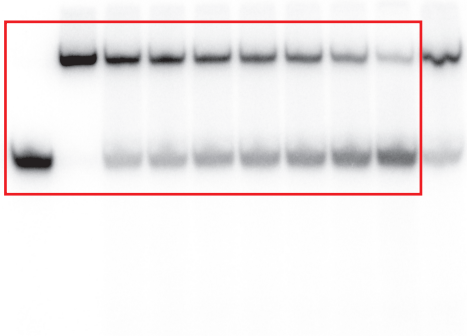

Figure 5D, G4-mut

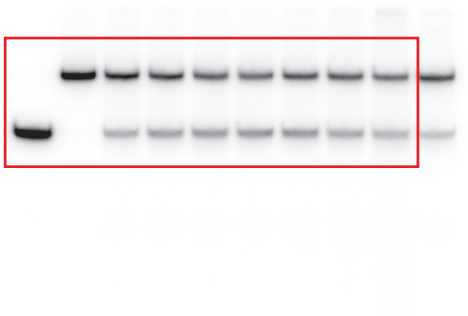

Figure 5E, G4-wt

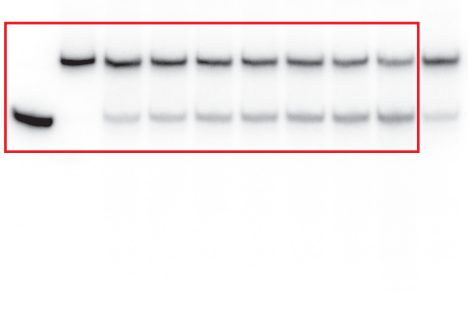

Figure 5E, G4-mut

Supplement: supp [file elife-72286-supp-v1.zip]

**Figure 1 - source data 3**

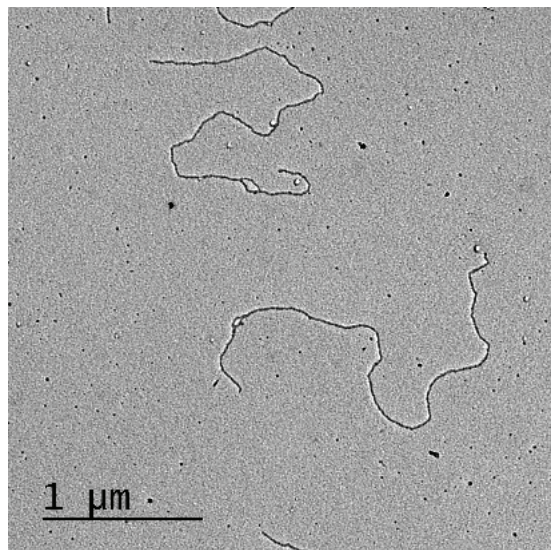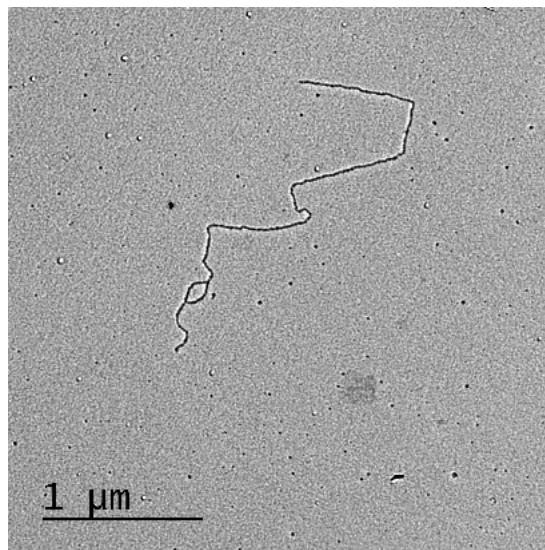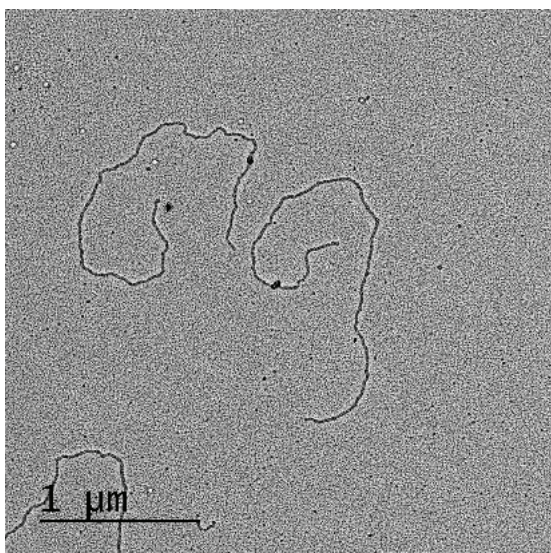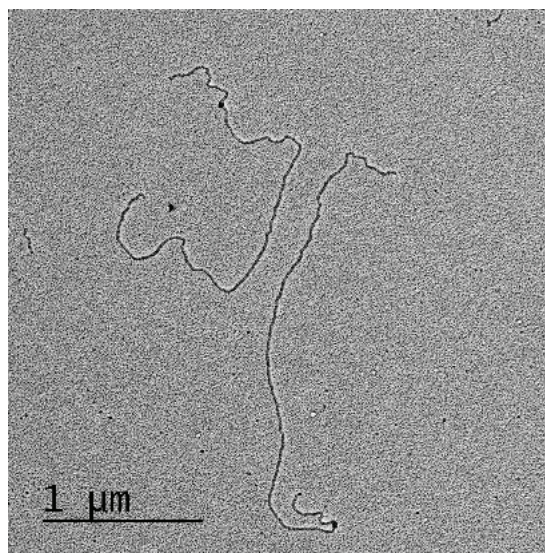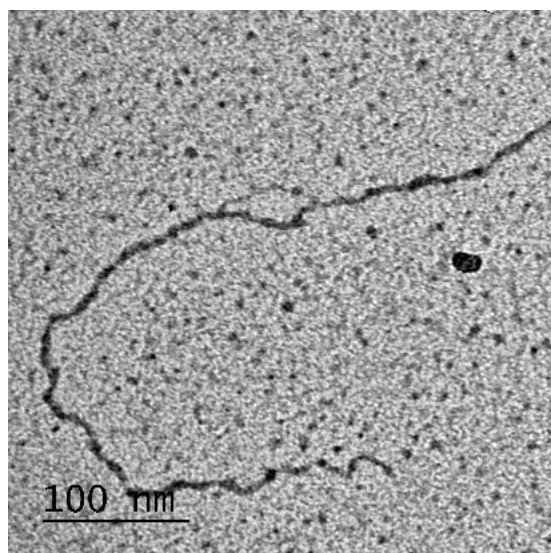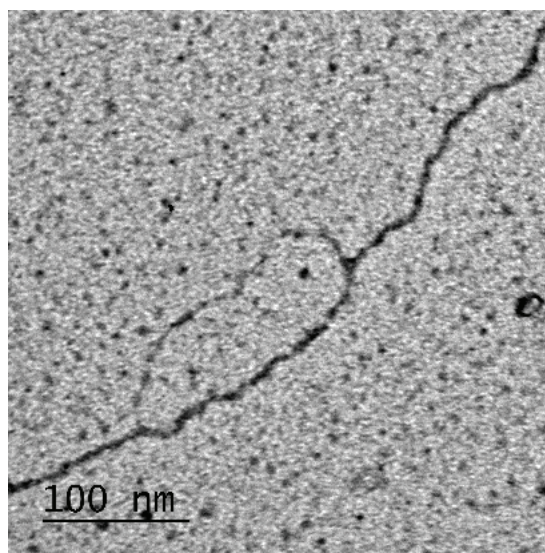

**Figure 1F**

Supplement: supp [file elife-72286-supp-v1.zip]

# Figure 7 - figure supplement 1

**A**

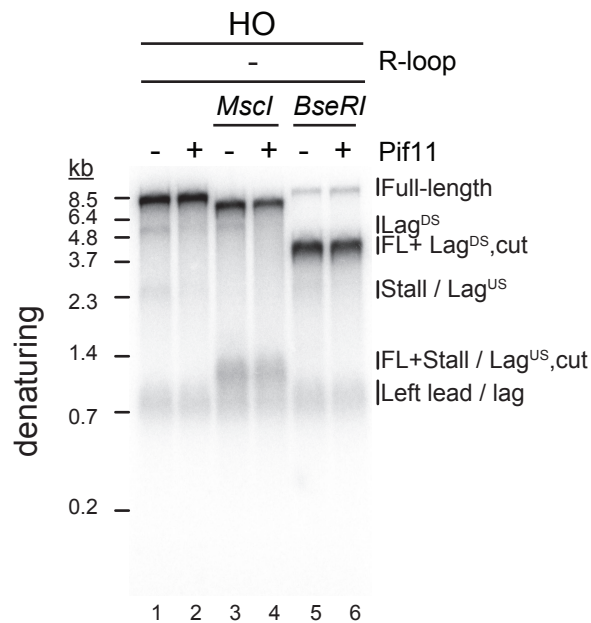

**B**

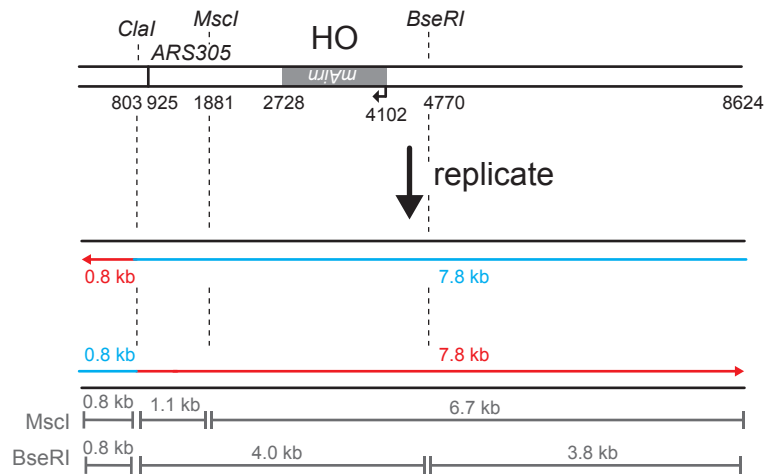

**C**

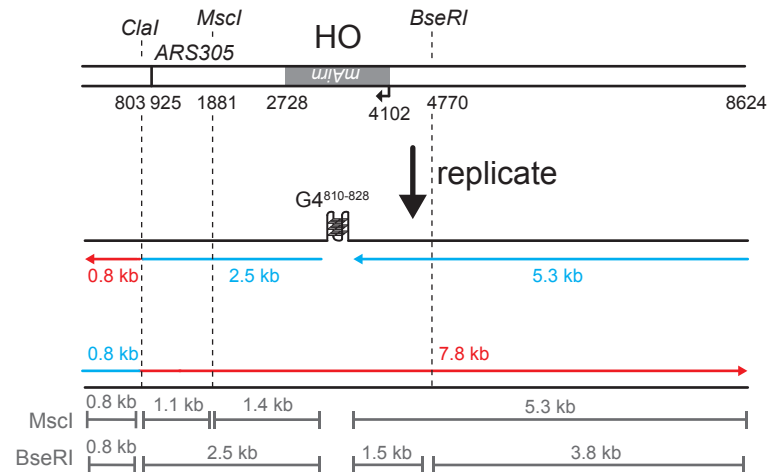

Supplement: supp [file elife-72286-supp-v1.zip]

Figure 2 - source data 3

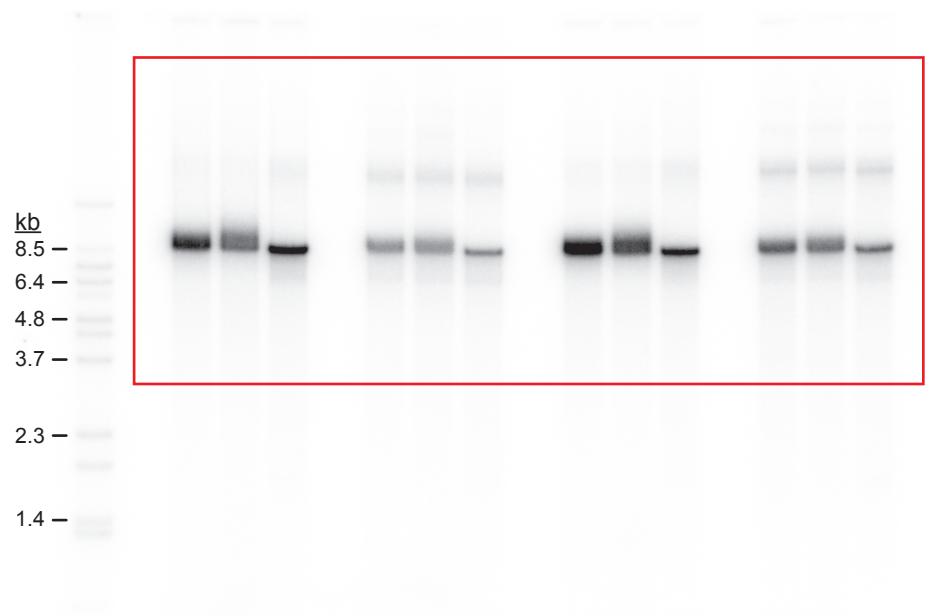

Figure 2F - native

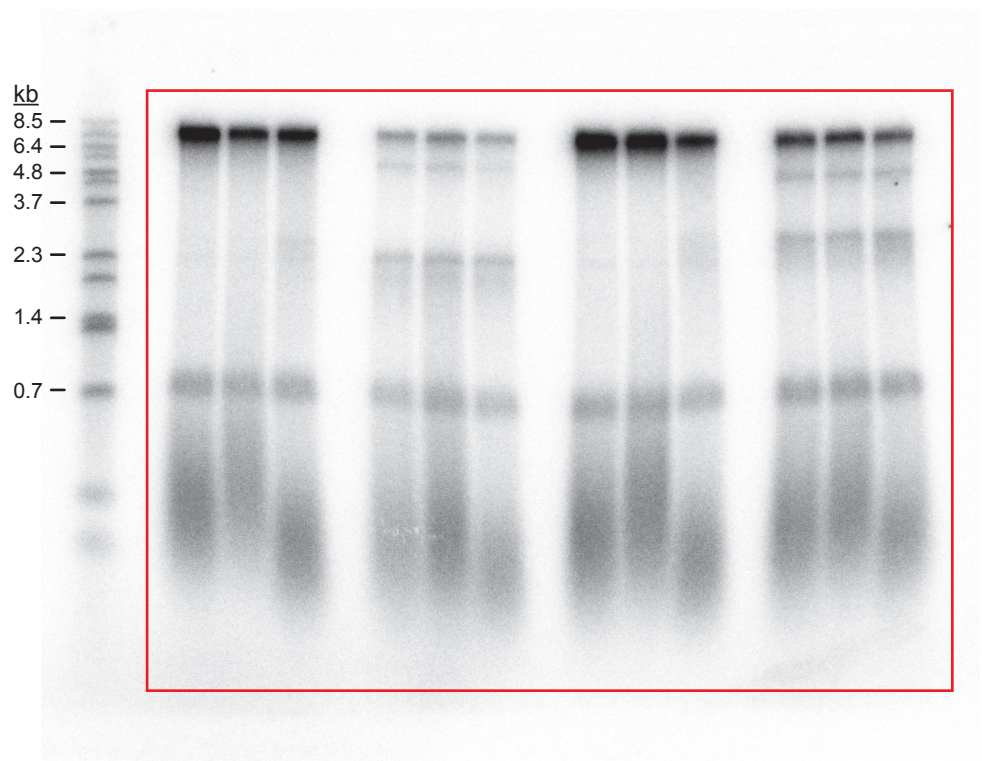

Figure 2F - denaturing

Supplement: supp [file elife-72286-supp-v1.zip]

**Figure 1- figure supplement 1 - source data 1**

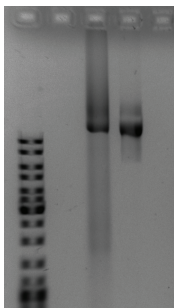

Figure 1 - figure supplement 1B

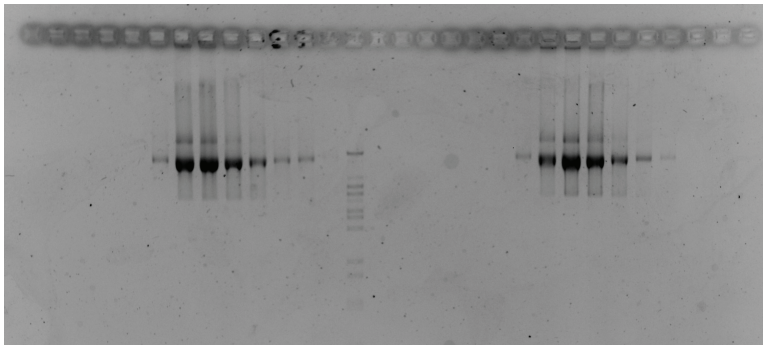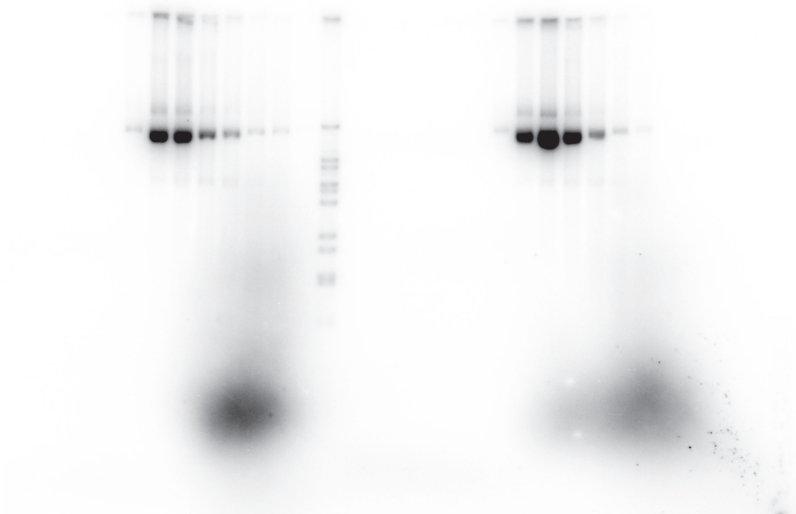

Figure 1 - figure supplement 1C

Supplement: supp [file elife-72286-supp-v1.zip]

Figure 5 - source data 1

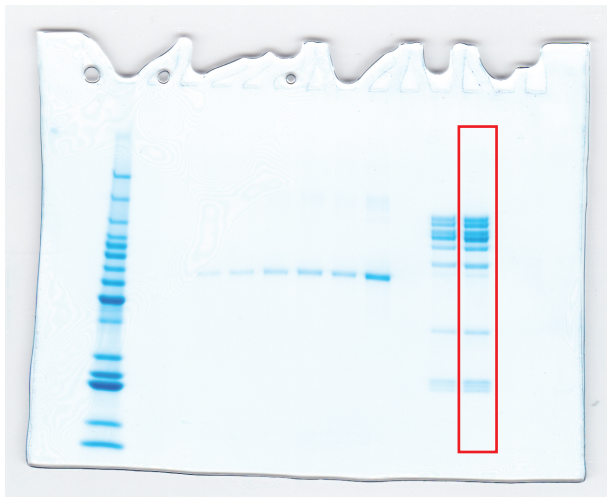

Figure 5A

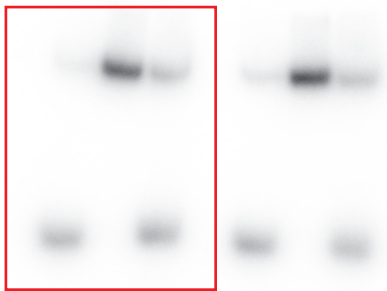

Figure 5B, i

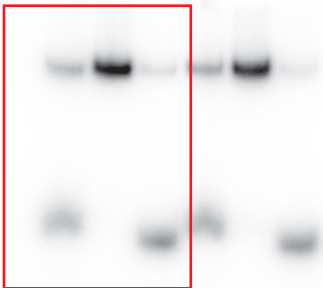

Figure 5B, ii

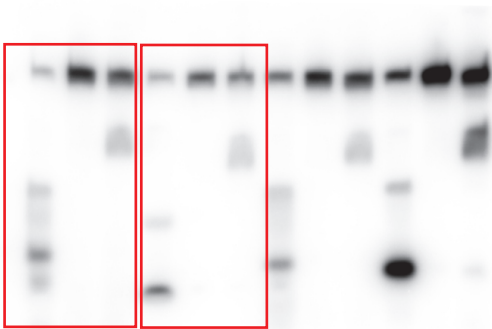

Figure 5B, iii+iv

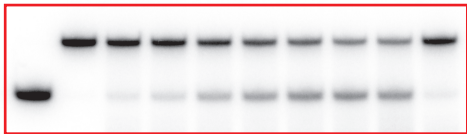

Figure 5C, DNA:DNA

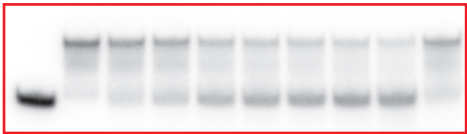

Figure 5C, RNA:DNA

Supplement: supp [file elife-72286-supp-v1.zip]
